# Supplementary material for: Pyrazolyl-pyrimidones inhibit the function of human solute carrier protein SLC11A2 (hDMT1) by metal chelation
Source: RSC Med Chem. 2020 Jun 2;11(9):1023–31. doi: 10.1039/d0md00085j (PMC7649969; doi:10.1039/d0md00085j)
Supplement: Supplementary file 2 [file MD-011-D0MD00085J-s002.xlsx]

## Sheet: Feuil1
ID	Smile	IC50 (µM)
5	O=C1C=C(C)N=C(N2N=C(C)C=C2C)N1	13.1 ± 0.7
6	CC1=NN(C2=NC(C)=CC(N2)=O)C(C)=C1C	10.0 ± 0.4
7	O=C1C=C(C)N=C(N2N=C(C)C(CC)=C2C)N1	4.2 ± 0.4
8	O=C1C=C(C)N=C(N2N=C(C)C(C3=CC=CC=C3)=C2C)N1
9	O=C1C=C(C)N=C(N2N=C(C)C(CC3=CC=CC=C3)=C2C)N1
10	O=C1C=C(N=C(N1)N2N=C(C=C2C)C(C)(C)C)C
11	O=C1C=C(N=C(N1)N2N=C(C=C2C)C3=CC=CC=C3)C
12	O=C1C=C(N=C(N1)N2N=C3CCCC3=C2C)C
13	O=C1C=C(N=C(N1)N2N=C(CCCC3)C3=C2C)C	1.1 ± 0.01
14	CC1=CC(NC(N2N=C3CCOCC3=C2C)=N1)=O
15	CC1=CC(NC(N2N=C(CCNC3)C3=C2C)=N1)=O
16	O=C(N1)C=C(C)N=C1N2C(CC)=CC(CC)=N2	3.8 ± 0.2
17	CC1=CC(NC(N2N=C(CCCC3)C3=C2CC)=N1)=O	2.26 ± 0.3
18	O=C1C=C(C)N=C(N2N=C3C4=C2CCCC4CCC3)N1	0.94 ± 0.2
19	O=C1C(C)=C(C)N=C(N2N=C(C)C=C2C)N1	12.5 ± 0.3
20	CC(C=C1C)=NN1C2=NC(C)=CC(C)=N2
21	O=C1C=C(CC)NN1C2=NC(C)=CC(N2)=O
22	O=C1C=C(C)N=C(N2NC(C)=C(CC3=CC=CC=C3)C2=O)N1
23	OC1=C(C(NC2=CC=CC(C(F)(F)F)=C2)=O)C(C)=NN1C(N3)=NC(C)=CC3=O
24	CC(NN1C2=NC(CC)=CC(N2)=O)=CC1=O
25	CC(NN1C2=NC=C(C(OCC)=O)C(N2)=O)=CC1=O
Substructure :	C1=CC=C(N=C1)N1C=CC=N1
ID	Smile
CHEMBL1080679	O=C(Nc1ccc(c2ccncc2)c(n1)n3cccn3)C4CC4
CHEMBL1082823	CCCC1CCC(=C(C1)NC(=O)C(C)Cc2ccn(n2)c3ccc(O)cn3)C(=O)O
CHEMBL1082824	CC(Cc1ccn(n1)c2ccc(O)cn2)C(=O)NC3=C(CCC(C3)c4cccc(F)c4)C(=O)O
CHEMBL1084059	CC(Cc1ccn(n1)c2ccc(O)cn2)C(=O)NC3=C(CCCC3)C(=O)O
CHEMBL1084060	OC(=O)[C@H]1CCCC[C@H]1NC(=O)CCc2ccn(n2)c3ccc(O)cn3
CHEMBL1084332	CC(Cc1ccn(n1)c2ccc(O)cn2)C(=O)NC3=C(CC[C@@H](C)C3)C(=O)O
CHEMBL1084448	CC(Cc1cnn(c1)c2ccc(O)cn2)C(=O)NC3=C(CCCC3)C(=O)O
CHEMBL1084877	C[C@@H]1CCCN1CCc2ccc3nc(ccc3c2)c4cnn(c4C)c5cc(cc(C)n5)C(F)(F)F
CHEMBL1085148	Cc1c(CCC(=O)NC2=C(CCCC2)C(=O)O)cnn1c3ccc(O)cn3
CHEMBL1085149	CC(Cc1cnn(c1C)c2ccc(O)cn2)C(=O)NC3=C(CCCC3)C(=O)O
CHEMBL1085150	OC(=O)C1=C(CCCC1)NC(=O)CCc2cnn(c2)c3ccc(O)cn3
CHEMBL1085401	CC(Cc1cnn(c1C)c2ccc(O)cn2)C(=O)Nc3ccccc3C(=O)O
CHEMBL1085616	CC(Cc1ccn(n1)c2ccc(O)cn2)C(=O)NC3=C(CC(CC3)c4cc(F)cc(F)c4)C(=O)O
CHEMBL1085842	CC(Cc1ccn(n1)c2ccc(O)cn2)C(=O)NC3=C(CCC(C3)c4cc(F)c(F)c(F)c4)C(=O)O
CHEMBL1085875	CC(Cc1ccn(n1)c2ccc(O)cn2)C(=O)Nc3ccccc3C(=O)O
CHEMBL1086108	Cc1c(CCC(=O)Nc2ccccc2C(=O)O)cnn1c3ccc(O)cn3
CHEMBL1086541	CC(Cc1ccn(n1)c2ccc(O)cn2)C(=O)NC3=C(CCC(C3)c4cccc(F)c4F)C(=O)O
CHEMBL1089182	CCOc1ccc(cc1)C(=O)NCCNC(=O)c2cn(nc2C(F)(F)F)c3ccccn3
CHEMBL1089457	CN1C(=O)C(=Cc2cnn(c12)c3ncccc3C(F)(F)F)c4cc(ccc4C)C(=O)NC5CC5
CHEMBL1089704	CC(C)(C)c1cc(NC(=O)Nc2ccc(Oc3ccnc4NC(=O)Nc34)cc2)n(n1)c5ccccn5
CHEMBL121125	CCCCc1nn(c2ccccn2)c(C(=O)OCC)c1Cc3ccc(cc3)c4ccccc4c5nn[nH]n5
CHEMBL123767	CCCCc1nn(c2ccccn2)c(C(=O)O)c1Cc3ccc(cc3)c4ccccc4c5nn[nH]n5
CHEMBL1271658	FC(F)(F)c1cc(nn1c2ccc(NC(=O)c3ccccc3)cn2)c4cccnc4
CHEMBL1289426	CCNc1c(cnn1c2ccccn2)C(=O)Nc3cc(ccc3C)C(=O)Nc4ccon4
CHEMBL1290626	Cc1ccc(cc1NC(=O)c2cnn(c2N)c3ccccn3)C(=O)Nc4ccon4
CHEMBL1300350	COc1ccc(OC)c(c1)S(=O)(=O)NC(C)c2cnn(c2C)c3ccccn3
CHEMBL1301349	CN(C)C(=O)c1ccc(nc1)n2cccn2
CHEMBL1302830	CNc1c(cnn1c2ccccn2)[N+](=O)[O-]
CHEMBL1303266	Cc1cc(nc2ccccc12)n3nc(C)c4C5C(Cc34)C5(C)C
CHEMBL1313911	CCOC(=O)c1cnn(c1N)c2ccc(cn2)C(F)(F)F
CHEMBL1318838	Cc1cc(C)n(n1)c2ccc(Cl)c(n2)C(=O)Nc3ccc(cc3)c4nnc5CCCCCn45
CHEMBL1323319	CCOC(=O)c1c(C)nn(c1C)c2ncccc2NC(=O)CCC(=O)O
CHEMBL1343963	Cc1cc(NC(=O)Nc2cccc(Cl)c2)n(n1)c3ccccn3
CHEMBL1348515	CCNC(=O)Nc1ccc(nc1)n2nc(C)c(C(=O)OCC)c2C
CHEMBL1348548	CCOC(=O)c1cnn(c1N)c2ccccn2
CHEMBL1348919	COc1ccc(cc1)c2cc(C(=O)O)c3c(C)nn(c4ccccn4)c3n2
CHEMBL1349408	Cc1ccn(n1)c2cccc(n2)n3ccc(C)n3
CHEMBL1350282	OC(=O)c1cc(nn1c2ccccn2)c3cccnc3
CHEMBL1352333	Cc1cc(C)n(n1)c2ccc(Cl)c(n2)C(=O)OCC(=O)N
CHEMBL1352720	Fc1ccc(NC(=O)c2ccc(nc2)n3cccn3)c(F)c1
CHEMBL1353628	OC(=O)c1ccc(nc1)n2cccn2
CHEMBL1361253	Cc1cc(C)n(n1)c2ccc(Cl)c(n2)C(=O)Nc3ccc(OC(F)(F)F)cc3
CHEMBL1367593	CC1CCCCN1C(=O)COC(=O)c2nc(ccc2Cl)n3nc(C)cc3C
CHEMBL1387314	Cc1cc(NC(=O)c2cccc(c2)S(=O)(=O)N3CCCCCC3)n(n1)c4ccccn4
CHEMBL1390855	Cc1nn(c(N)c1N=O)c2ccccn2
CHEMBL1391076	CSCc1oc(cc1)C(=O)NC(C)c2cnn(c2C)c3ccccn3
CHEMBL1400352	Cc1cc(NC(=O)c2cncc(Br)c2)n(n1)c3ccccn3
CHEMBL1402225	CCOC(=O)c1cnn(c1N)c2cc(C)c3ccccc3n2
CHEMBL1404737	COc1ccccc1NC(=O)c2ccc(nc2)n3cccn3
CHEMBL1411832	Cc1cc(C)n(n1)c2ccc(Cl)c(n2)C(=O)O
CHEMBL1415069	Cc1oc(cc1)C2C3=C(O)CCCC3=Nc4c2c(C)nn4c5ccccn5
CHEMBL1417310	CCc1c(C)c(C#N)c2nc3ccccc3n2c1n4nc(C)cc4C
CHEMBL1421112	CCOC(=O)c1cc(nc2c1c(C)nn2c3ccccn3)c4ccccc4
CHEMBL1423486	CN1CCN(CC1)C(=O)c2ccc(nc2)n3cccn3
CHEMBL1423637	Cc1ccc(NC(=O)c2ccc(nc2)n3cccn3)cc1
CHEMBL1424266	Cc1nn(c2CCc3cnc(nc3c12)N4CCOCC4)c5ccccn5
CHEMBL1433273	Cc1cc(NC(=O)c2cc(ccc2C)S(=O)(=O)N3CCCCC3)n(n1)c4ccccn4
CHEMBL1441987	Cc1cc(NC(=O)c2ccc(cc2)C#N)n(n1)c3ccccn3
CHEMBL1446061	CC(=C)C1Cc2c(C)nn(c2C1)c3ccccn3
CHEMBL144866	CCN1c2ncccc2C(=O)N(C)c3ccc(nc13)n4cccn4
CHEMBL145091	Cc1cnn(c1)c2nccc3nc(O)ccc23
CHEMBL1451761	CN(C)S(=O)(=O)c1cccc(c1)C(=O)Nc2cc(C)nn2c3ccccn3
CHEMBL1451847	Cc1nn(c(C)c1Oc2ccccc2O)c3ccccn3
CHEMBL145863	Cc1cccc(c1)C(=O)N2CCC(CNCc3cccc(n3)n4cccn4)CC2
CHEMBL1460295	Cc1nn(c2ccccn2)c3nc(cc(C(=O)N4CCOCC4)c13)c5cccs5
CHEMBL146124	Clc1ccc(cc1)C(=O)N2CCC(CNCc3cccc(n3)n4cccn4)CC2
CHEMBL146394	O=C(N1CCC(CNCc2cccc(n2)n3cccn3)CC1)c4cccc(c4)C#N
CHEMBL1465264	Nc1cccnc1n2nc(cc2C(F)(F)F)C(F)(F)F
CHEMBL146563	O=C(N1CCC(CNCc2cccc(n2)n3cccn3)CC1)c4ccccc4
CHEMBL1467064	CCOC(=O)c1cc(nc2c1c(C)nn2c3ccccn3)c4ccncc4
CHEMBL1468717	COc1ccc(O)c(c1)C(=O)c2cnn(c2)c3ccccn3
CHEMBL147341	Clc1ccc(cc1Cl)C(=O)N2CCC(CNCCc3cccc(n3)n4cccn4)CC2
CHEMBL147479	CCOc1cccc(c1)C(=O)N2CCC(CNCc3cccc(n3)n4cccn4)CC2
CHEMBL147522	Clc1ccccc1C(=O)N2CCC(CNCc3cccc(n3)n4cccn4)CC2
CHEMBL1477717	COc1ccc(cc1)c2ccn(n2)c3cccc(F)n3
CHEMBL147810	Clc1ccc(cc1Cl)S(=O)(=O)N2CCC(CNCc3cccc(n3)n4cccn4)CC2
CHEMBL147869	Clc1ccc(CN2CCC(CNCc3cccc(n3)n4cccn4)CC2)cc1Cl
CHEMBL1479214	Cc1cc(nc2ccccc12)n3nc(C)c4CCCc34
CHEMBL147922	Fc1ccc(cc1Cl)C(=O)N2CCC(CNCc3cccc(n3)n4cccn4)CC2
CHEMBL147947	Clc1cccc(c1)C(=O)NCC2CCN(Cc3cccc(n3)n4cccn4)CC2
CHEMBL1483054	CCOC(=O)c1cc(nn1c2ccccn2)c3ccccc3
CHEMBL148901	Clc1ccc(cc1Cl)C(=O)NCC#CCNCc2cccc(n2)n3cccn3
CHEMBL148902	CN(CCCCNCc1cccc(n1)n2cccn2)C(=O)c3ccccc3
CHEMBL148908	CN1C(=O)C=NN(CCCCNCc2cccc(n2)n3cccn3)C1=O
CHEMBL149093	CCCN(CCC)Cc1cccc(n1)n2cccn2
CHEMBL149148	O=C(C1CCCCC1)N2CCC(CNCc3cccc(n3)n4cccn4)CC2
CHEMBL149208	COc1ccc2[nH]cc(CCNCc3cccc(n3)n4cccn4)c2c1
CHEMBL149209	COc1ccc(CCNCc2cccc(n2)n3cccn3)cc1
CHEMBL149648	Clc1cccc(c1)C(=O)N2CCC(CNCc3cccc(n3)n4cccn4)CC2
CHEMBL1497197	Nc1nn(cc1c2ccc(Cl)cc2)c3cccc(F)n3
CHEMBL149760	COC(=O)c1ccc(cc1Cl)C(=O)N2CCC(CNCc3cccc(n3)n4cccn4)CC2
CHEMBL1500114	COc1ccc(NC(=O)c2nc(ccc2Cl)n3nc(C)cc3C)cc1Cl
CHEMBL150184	Cc1cccc(c1)C(=O)NCCCCNCc2cccc(n2)n3cccn3
CHEMBL1502689	Cc1nn(c2ccccn2)c3nc(cc(C(=O)NCc4occc4)c13)c5cccs5
CHEMBL1505273	Cc1nn(c2CCc3cnc(N)nc3c12)c4ccccn4
CHEMBL1507631	Cc1nn(c2ccccn2)c3N=C4CCCC(=C4C(c5ccccn5)c13)O
CHEMBL1509625	COc1ccc(OC)c(NC(=O)c2ccc(nc2)n3cccn3)c1
CHEMBL1516515	Cc1nn(c2CCC(Br)C(=O)c12)c3ccccn3
CHEMBL1518874	Cc1nn(c(C)c1Oc2ccccc2O)c3ccc(cn3)C(F)(F)F
CHEMBL1525178	COC(=O)c1nc(ccc1Cl)n2nc(C)cc2C
CHEMBL1526865	Cc1cc(C)n(n1)c2ccc(Cl)c(n2)C(=O)Nc3cc(ccc3Cl)C(F)(F)F
CHEMBL1532716	Cc1cc(C)c(C2C3=C(O)c4ccccc4C3=Nc5c2c(C)nn5c6ccccn6)c(C)c1
CHEMBL1534071	Cc1cc(C)c2nc(cc(C)c2c1)n3nc(C)cc3N
CHEMBL1541376	Cc1nn(c2ccccn2)c3N=C4C(=C(O)c5ccccc45)C(c6c(F)cccc6Cl)c13
CHEMBL1543143	Clc1ccc(CNC(=O)c2ccc(nc2)n3cccn3)cc1
CHEMBL1549037	Nc1nn(cc1c2ccccc2)c3cccc(F)n3
CHEMBL155297	CCCC[C@H](NC(=O)OC(C(C)C)C(C)C)C(=O)C(=O)Nc1ccnn1c2ccccn2
CHEMBL1555917	COc1cccc(NC(=O)c2ccc(nc2)n3cccn3)c1
CHEMBL1559876	NS(=O)(=O)c1ccc(NC(=O)CSc2nc(O)c3cnn(c4ccccn4)c3n2)cc1
CHEMBL1561842	ONc1cccnc1n2nc(cc2C(F)(F)F)C(F)(F)F
CHEMBL1566041	Cc1cc(C)n(n1)c2cccc(F)n2
CHEMBL1569652	Cc1cc(N)n(n1)c2cc(C)c3ccccc3n2
CHEMBL1570765	Cc1cc(C)n(n1)c2ccc3cccc(NS(=O)(=O)C)c3n2
CHEMBL1582838	Cc1cc(OCC(=O)Nc2cc(C)nn2c3ccccn3)c4C5=C(CCC5)C(=O)Oc4c1
CHEMBL1582958	COc1ccc(NC(=O)c2ccc(nc2)n3cccn3)cc1
CHEMBL1584002	CCOC(=O)c1cc(nc2c1c(C)nn2c3ccccn3)c4cccs4
CHEMBL1588637	CNC(=O)c1ccc(nc1)n2cccn2
CHEMBL1589096	Cc1nn(c2ccccn2)c3N=C4C(=C(O)c5ccccc45)C(c6ccccc6Cl)c13
CHEMBL1596042	Cc1cc(NC(=O)c2ccc(F)cc2)n(n1)c3ccccn3
CHEMBL1599057	CCCc1c(C)nn(c1C)c2ncccc2[N+](=O)[O-]
CHEMBL1606659	Cc1nn(c2N=C3CC(C)(C)CC(=C3C(c4ccncc4)c12)O)c5ccccn5
CHEMBL1613167	CCOC(=O)c1cc(nn1c2ccccn2)c3cccnc3
CHEMBL165994	Oc1c2CSc3ccccc3c2nn1c4ccccn4
CHEMBL1668561	Cc1cc(C)n(n1)c2nc(SCC#N)c(C#N)c3CCCCc23
CHEMBL1668563	CCOC(=O)CSc1nc(c2CCCCc2c1C#N)n3nc(C)cc3C
CHEMBL1668653	Cc1cc(C)n(n1)c2nc(SCC(=O)N)c(C#N)c3CCCCc23
CHEMBL1668655	CC(=O)CSc1nc(c2CCCCc2c1C#N)n3nc(C)cc3C
CHEMBL1668657	Cc1cc(C)n(n1)c2nc(SCC(=O)c3ccccc3)c(C#N)c4CCCCc24
CHEMBL1673372	CC[C@H]1OC(=O)[C@H](C)C(=O)[C@H](C)[C@@H](O[C@@H]2O[C@H](C)C[C@@H]([C@H]2O)N(C)C)[C@@]3(C)C[C@@H](C)\C(=N/C(=O)C)\[C@H](C)[C@H](OC\C(=N/OCc4ccc(nc4)n5cccn5)\CO3)[C@]1(C)O
CHEMBL1688555	CC[C@H]1OC(=O)[C@H](C)C(=O)[C@H](C)[C@@H](O[C@@H]2O[C@H](C)C[C@@H]([C@H]2O)N(C)C)[C@@]3(C)C[C@@H](C)C(=O)[C@H](C)[C@@H](OC\C(=N/OCc4ccc(nc4)n5cccn5)\CO3)[C@]1(C)O
CHEMBL1701485	CNc1c(cnn1c2cccc(Cl)n2)[N+](=O)[O-]
CHEMBL1711344	Cc1cc(C)n(n1)c2ccc(Cl)c(n2)C(=O)NCc3ccccc3
CHEMBL1713687	Cc1cc(N)n(n1)c2ccccn2
CHEMBL1722444	Cc1ccc(nc1)n2nc(C)c3C(=O)CC(C)(C)C(Br)c23
CHEMBL1733957	CN(C)\C=N\c1ncnc2c1cnn2c3ccc(cn3)C(F)(F)F
CHEMBL1735186	Cc1nn(c2ccc(Cl)cn2)c3C(Br)C(C)(C)CC(=O)c13
CHEMBL173770	CS(=O)(=O)c1ccc(nc1)n2nc(cc2c3ccc(F)cc3)C(F)F
CHEMBL1741676	CN(C)S(=O)(=O)c1ccc(cc1)C(=O)Nc2cc(C)nn2c3ccccn3
CHEMBL174219	CS(=O)(=O)c1ccc(nc1)n2nc(cc2c3ccccc3)C(F)F
CHEMBL1742204	COc1ccc(NC(=O)c2ccc(nc2)n3cccn3)c(OC)c1
CHEMBL174586	CS(=O)(=O)c1ccc(nc1)n2nc(cc2c3ccc(Br)cc3)C(F)(F)F
CHEMBL174724	COc1ccc(cc1F)c2cc(nn2c3ccc(cn3)S(=O)(=O)C)C(F)F
CHEMBL174860	CS(=O)(=O)c1ccc(nc1)n2nc(cc2c3ccc(Cl)cc3)C(F)F
CHEMBL174982	CS(=O)(=O)c1ccc(nc1)n2nc(C(F)F)c(Br)c2c3ccccc3
CHEMBL175340	CC(C)c1ccc(cc1)c2cc(nn2c3ccc(cn3)S(=O)(=O)C)C(F)F
CHEMBL175485	CS(=O)(=O)c1ccc(nc1)n2nc(C(F)F)c(Cl)c2c3ccccc3
CHEMBL175826	CS(=O)(=O)c1ccc(nc1)n2nc(cc2c3ccccc3)C(F)(F)F
CHEMBL1760583	Cc1ccc(CN2C(=O)Nc3c(N)nc(cc23)n4cccn4)cn1
CHEMBL176265	CCOc1ccc(cc1)c2cc(nn2c3ccc(cn3)S(=O)(=O)C)C(F)(F)F
CHEMBL176642	CS(=O)(=O)c1ccc(nc1)n2nc(cc2c3ccc(Cl)cc3)C(F)(F)F
CHEMBL176677	CCCc1ccc(cc1)c2cc(nn2c3ccc(cn3)S(=O)(=O)C)C(F)F
CHEMBL176934	CN(C)c1ccc(cc1)c2cc(nn2c3ccc(cn3)S(=O)(=O)C)C(F)(F)F
CHEMBL176983	COc1ccc(cc1)c2cc(nn2c3ccc(cn3)S(=O)(=O)C)C(F)(F)F
CHEMBL1771717	Cc1nc(C)n(n1)c2ccc(Nc3cc(ccn3)c4ccn(n4)c5ccccn5)cc2
CHEMBL177244	COc1ccc(cc1)c2cc(nn2c3ccc(cn3)S(=O)(=O)C)C(F)F
CHEMBL177397	CS(=O)(=O)c1ccc(nc1)n2nc(cc2c3ccc(Br)cc3)C(F)F
CHEMBL177649	COc1ccc(cc1Br)c2cc(nn2c3ccc(cn3)S(=O)(=O)C)C(F)(F)F
CHEMBL178190	NC(=O)c1nn(c2ccccn2)c3c1ccc4[nH]ncc34
CHEMBL1802905	CN(C)S(=O)(=O)Nc1ccc2C=Cc3ncc(cc3C(=O)c2c1)c4cnn(c4)c5ccccn5
CHEMBL1813796	Nc1c2C(=O)NC(=Cc2nn1c3ccccn3)c4ccccc4
CHEMBL182771	N#Cc1cccc(c1)c2ccn(n2)c3ccccn3
CHEMBL1829504	c1ccc(nc1)c2n[nH]cc2c3ccnc(c3)n4cccn4
CHEMBL182973	N#Cc1cccc(c1)c2cnn(c2)c3ccccn3
CHEMBL1830471	Cc1ccc(cc1)c2cc(CCC(=O)N3CCN(Cc4ccc(cc4)C(C)(C)C)CC3)nn2c5ccc6ccccc6n5
CHEMBL1830472	CC(C)(C)c1ccc(CN2CCN(CC2)C(=O)CCc3cc(c4ccc(F)cc4)n(n3)c5ccc6ccccc6n5)cc1
CHEMBL1830473	CC(C)(C)c1ccc(CN2CCN(CC2)C(=O)CCc3cc(c4ccc(cc4)C(F)(F)F)n(n3)c5ccc6ccccc6n5)cc1
CHEMBL1830479	CCOC(=O)C1CCN(CC1)C(=O)CCc2cc(c3ccc(C)cc3)n(n2)c4ccc5ccccc5n4
CHEMBL1830480	CC(C)c1ccc(OC(=O)CCc2cc(c3ccc(C)cc3)n(n2)c4ccc5ccccc5n4)cc1
CHEMBL1873958	Cc1cc(NC(=O)C2CCC2)n(n1)c3ccccn3
CHEMBL1875968	COc1oc(cc1)C(=O)NC(C)c2cnn(c2C)c3ccccn3
CHEMBL1881835	CCOC(=O)c1c(C)nn(c1C)c2ncccc2NC(=O)NC(C)C
CHEMBL188662	CSc1nn(c2N=C(C)NC(=O)c12)c3ccccn3
CHEMBL1887822	Cc1nn(c2CCc3sc(N)nc3c12)c4ccccn4
CHEMBL1888927	Cc1cc(Nc2ncc(Cl)cc2Cl)n(n1)c3ccccn3
CHEMBL1891957	CCOc1ccc(NC(=O)c2ccc(nc2)n3cccn3)cc1
CHEMBL189850	Cc1nn(c(Oc2ccccc2)c1\C=N\OCc3ccc(cc3)C(=O)OC(C)(C)C)c4ccccn4
CHEMBL1898831	Cc1cc(C)n(n1)c2ncccc2[N+](=O)[O-]
CHEMBL1904180	CNC(=O)COC(=O)c1nc(ccc1Cl)n2nc(C)cc2C
CHEMBL1905410	Cc1nn(c2ccccn2)c3C(N=[N+]=[N-])C(C)(C)CC(=O)c13
CHEMBL1906448	Cc1nn(c2ccccn2)c3C(Br)C(C)(C)CC(=O)c13
CHEMBL1916266	CCC(CC)NC(=O)c1cnn(c1NS(=O)(=O)c2ccc(C)cc2)c3ccccn3
CHEMBL1933361	CCCC(Oc1cnn(c1)c2ccc(cn2)C(F)(F)F)c3ccc(cc3)C(=O)NCCC(=O)O
CHEMBL1933787	Oc1c2c(CCc3ccccc23)nn1c4ccccn4
CHEMBL1933789	Oc1c2c(CCc3ccccc23)nn1c4ccccn4=O
CHEMBL1933791	COc1ccc(cc1)c2ccc3c(CCc4nn(c(O)c34)c5ccccn5)c2
CHEMBL1933792	Oc1c2c(CCc3cc(ccc23)c4ccccc4)nn1c5ccccn5
CHEMBL1933793	Cc1ccc(cc1)c2ccc3c(CCc4nn(c(O)c34)c5ccccn5)c2
CHEMBL1933794	Oc1c2c(CCc3cc(Br)ccc23)nn1c4ccccn4
CHEMBL1933795	Oc1c2c(CCc3cc(ccc23)C#N)nn1c4ccccn4
CHEMBL1933796	COc1ccc2c(CCc3nn(c(O)c23)c4ccccn4)c1
CHEMBL193903	Oc1nnc(Cc2cccc(NC(=O)c3ccc(nc3)n4cccn4)c2)c5ccccc15
CHEMBL1968852	OC(=O)c1ccn(n1)c2cccc(n2)n3ccc(n3)C(=O)O
CHEMBL197705	CC(C)(C)CNc1c(C#N)c(nn1c2ccc(cn2)S(=O)(=O)N)C(F)(F)F
CHEMBL197869	CCC(C)CNc1c(C#N)c(nn1c2ccc(cn2)S(=O)(=O)N)C(F)F
CHEMBL198024	CS(=O)(=O)c1ccc(nc1)n2nc(c(C#N)c2NC3CC4CCC3C4)C(F)(F)F
CHEMBL198189	CS(=O)(=O)c1ccc(nc1)n2nc(c(C#N)c2N3CCCCC3)C(F)(F)F
CHEMBL199017	CC(C)NC(=O)c1cc(Cl)cc(C)c1NC(=O)c2cc(nn2c3ncccc3Cl)C(F)(F)F
CHEMBL1990969	OC(=O)CN(CC(=O)O)Cc1ccn(n1)c2cccc(n2)n3ccc(CN(CC(=O)O)CC(=O)O)n3
CHEMBL199337	CS(=O)(=O)c1ccc(nc1)n2nc(c(C#N)c2NCc3cccs3)C(F)(F)F
CHEMBL199344	CC1CC(C)CN(C1)c2c(C#N)c(nn2c3ccc(cn3)S(=O)(=O)C)C(F)(F)F
CHEMBL199346	CS(=O)(=O)c1ccc(nc1)n2nc(C(F)F)c(C#N)c2N3CCCCCC3
CHEMBL199431	CC(C)C(C)Nc1c(C#N)c(nn1c2ccc(cn2)S(=O)(=O)C)C(F)(F)F
CHEMBL1994605	Cc1nn(c2CCC(=C(SC#N)c12)C=O)c3ccccn3
CHEMBL199681	CS(=O)(=O)c1ccc(nc1)n2nc(C(F)F)c(C#N)c2NC3CC4CCC3C4
CHEMBL199682	C[C@@H]1C[C@H](C)CN(C1)c2c(C#N)c(nn2c3ccc(cn3)S(=O)(=O)N)C(F)F
CHEMBL199901	CS(=O)(=O)c1ccc(nc1)n2nc(C(F)F)c(C#N)c2NCC3OCCO3
CHEMBL199992	CS(=O)(=O)c1ccc(nc1)n2nc(c(C#N)c2NCC3CC3)C(F)(F)F
CHEMBL200152	CC(C)(C)CNc1c(C#N)c(nn1c2ccc(cn2)S(=O)(=O)C)C(F)F
CHEMBL200406	CC(C)Nc1c(C#N)c(nn1c2ccc(cn2)S(=O)(=O)C)C(F)(F)F
CHEMBL2004615	CSc1nn(c(N)c1C(=O)N)c2ccccn2
CHEMBL200518	NS(=O)(=O)c1ccc(nc1)n2nc(c(C#N)c2NC3CC4CCC3C4)C(F)(F)F
CHEMBL200559	CC1CC(C)CN(C1)c2c(C#N)c(nn2c3ccc(cn3)S(=O)(=O)N)C(F)(F)F
CHEMBL200812	C[C@@H]1CN(C[C@H](C)O1)c2c(C#N)c(nn2c3ccc(cn3)S(=O)(=O)C)C(F)F
CHEMBL200909	C[C@@H]1CN(C[C@H](C)O1)c2c(C#N)c(nn2c3ccc(cn3)S(=O)(=O)N)C(F)F
CHEMBL201179	C[C@@H]1CN(C[C@H](C)O1)c2c(C#N)c(nn2c3ccc(cn3)S(=O)(=O)C)C(F)(F)F
CHEMBL201696	CS(=O)(=O)c1ccc(nc1)n2nc(c(C#N)c2NCC3CCCO3)C(F)(F)F
CHEMBL201829	CCCC(C)Oc1c(C#N)c(nn1c2ccc(cn2)S(=O)(=O)C)C(F)(F)F
CHEMBL201881	COc1cc(nn1c2ccc(cn2)S(=O)(=O)C)C(F)(F)F
CHEMBL2022872	c1ccc(nc1)n2cc(cn2)c3ccnc4ccccc34
CHEMBL2023234	C[C@]12Cc3cnn(c3C=C1CC[C@H]4[C@@H]5CC[C@](O)(C(=O)CSc6nc7ccccc7s6)[C@@]5(C)C[C@H](O)[C@H]24)c8ccccn8
CHEMBL2024684	CN1C=Nc2ccc(cc2C1=O)c3ccnn3c4cccc(C)n4
CHEMBL2024685	Cc1cccc(n1)n2nccc2c3ccc4N=CN(C=C)C(=O)c4c3
CHEMBL2024686	CN1C=Nc2ccc(cc2C1=O)c3c(C)cnn3c4cccc(C)n4
CHEMBL2024687	CN1C=Nc2ccc(cc2C1=O)c3cc(C)nn3c4cccc(C)n4
CHEMBL2024688	Cc1cccc(n1)n2ncc(C)c2c3ccc4N=CNC(=O)c4c3
CHEMBL2024689	CCc1cc(c2ccc3N=CN(C)C(=O)c3c2)n(n1)c4cccc(C)n4
CHEMBL2024690	Cc1cccc(n1)n2nccc2c3ccc4N=CNC(=O)c4c3
CHEMBL2024691	CCc1cnn(c2cccc(C)n2)c1c3ccc4N=CNC(=O)c4c3
CHEMBL2024692	CCN1C=Nc2ccc(cc2C1=O)c3ccnn3c4cccc(C)n4
CHEMBL2024693	Cc1cccc(n1)n2nc3CCCc3c2c4ccc5N=CNC(=O)c5c4
CHEMBL202693	CS(=O)(=O)c1ccc(nc1)n2nc(cc2OC3CCCCC3)C(F)(F)F
CHEMBL202856	Cc1cccc(Oc2c(C#N)c(nn2c3ccc(cn3)S(=O)(=O)C)C(F)(F)F)c1C
CHEMBL203542	CCC(CC)Oc1cc(nn1c2ccc(cn2)S(=O)(=O)C)C(F)(F)F
CHEMBL203697	CCOCCSc1c(C#N)c(nn1c2ccc(cn2)S(=O)(=O)C)C(F)(F)F
CHEMBL203850	CC(C)Oc1c(C)c(nn1c2ccc(cn2)S(=O)(=O)C)C(F)(F)F
CHEMBL204029	CCC(Oc1c(C#N)c(nn1c2ccc(cn2)S(=O)(=O)C)C(F)(F)F)C(C)C
CHEMBL204178	CS(=O)(=O)c1ccc(nc1)n2nc(c(C#N)c2SCc3ccccc3F)C(F)(F)F
CHEMBL204198	CS(=O)(=O)c1ccc(nc1)n2nc(c(C#N)c2OC3CCOC3)C(F)(F)F
CHEMBL204252	CCC(CC)Oc1c(C#N)c(nn1c2ccc(cn2)S(=O)(=O)C)C(F)(F)F
CHEMBL204453	CS(=O)(=O)c1ccc(nc1)n2nc(c(C#N)c2Oc3ccccc3)C(F)(F)F
CHEMBL204506	CS(=O)(=O)c1ccc(nc1)n2nc(c(C#N)c2SCc3ccccc3)C(F)(F)F
CHEMBL204559	CCC(CC)Oc1c(C)c(nn1c2ccc(cn2)S(=O)(=O)C)C(F)(F)F
CHEMBL204641	CS(=O)(=O)c1ccc(nc1)n2nc(c(C#N)c2OCC3CCC=CC3)C(F)(F)F
CHEMBL204703	CS(=O)(=O)c1ccc(nc1)n2nc(c(C#N)c2OC3CCC3)C(F)(F)F
CHEMBL204707	CCC(C)Sc1c(C#N)c(nn1c2ccc(cn2)S(=O)(=O)C)C(F)(F)F
CHEMBL204859	CS(=O)(=O)c1ccc(nc1)n2nc(c(C#N)c2OCC3CCC3)C(F)(F)F
CHEMBL205163	CC1CCCCC1Oc2c(C#N)c(nn2c3ccc(cn3)S(=O)(=O)C)C(F)(F)F
CHEMBL205178	CCCCOc1cc(nn1c2ccc(cn2)S(=O)(=O)C)C(F)(F)F
CHEMBL205308	CS(=O)(=O)c1ccc(nc1)n2nc(cc2c3ccc(c4occc4)c(c3)C(=O)N)C(F)(F)F
CHEMBL205351	CS(=O)(=O)c1ccc(nc1)n2nc(cc2c3ccc(c4occc4)c(c3)C#N)C(F)(F)F
CHEMBL205938	CS(=O)(=O)c1ccc(nc1)n2nc(cc2c3ccc(cc3)c4cncs4)C(F)(F)F
CHEMBL206207	CS(=O)(=O)c1ccc(nc1)n2nc(cc2c3ccc(c(c3)C#N)c4nccs4)C(F)(F)F
CHEMBL206359	CS(=O)(=O)c1ccc(nc1)n2nc(cc2c3ccc(cc3)c4occc4)C(F)(F)F
CHEMBL206402	Cc1scnc1c2ccc(cc2)c3cc(nn3c4ccc(cn4)S(=O)(=O)C)C(F)(F)F
CHEMBL206705	Clc1ccc(cc1)c2cnn(c2)c3ccccn3
CHEMBL207702	CS(=O)(=O)c1ccc(nc1)n2nc(cc2c3ccc(cc3F)c4cscn4)C(F)(F)F
CHEMBL207814	O=C(Nc1cc(nn1c2ccccn2)c3ccccc3)c4ccccc4
CHEMBL208450	CS(=O)(=O)c1ccc(nc1)n2nc(cc2c3ccc(cc3)c4occc4)C(F)F
CHEMBL2094568	Cc1cc(C)n(n1)c2ccc3c(Cl)cc(Cl)c(O)c3n2
CHEMBL210404	COc1ccccc1N2CCN(Cc3cnn(c3)c4ccccn4)CC2
CHEMBL2115110	CC(C)c1nn(c2ccccn2)c(c1\C=C\[C@@H]3C[C@@H](O)CC(=O)O3)c4ccc(F)cc4
CHEMBL212160	COc1ccccc1N2CCN(Cc3cn4c(cccc4n3)n5cccn5)CC2
CHEMBL2131252	COc1ccc(C)cc1S(=O)(=O)NC(C)c2cnn(c2C)c3ccccn3
CHEMBL2138035	COc1ccc(Cl)cc1S(=O)(=O)NC(C)c2cnn(c2C)c3ccccn3
CHEMBL2147771	Cc1cc(N2CCN(CC2)[C@@H]3CN[C@@H](C3)C(=O)N4CCSC4)n(n1)c5ccccn5
CHEMBL2147774	Cc1cc(N2CCN(CC2)[C@@H]3CN[C@@H](C3)C(=O)N4CCSC4)n(n1)c5ccc(cn5)C#N
CHEMBL218070	OC(=O)c1cnn(c1)c2ccc(COCc3ccc(cc3)C#N)cn2
CHEMBL218233	COc1cccc(c1)c2ccc(nc2)n3cc(cn3)C(=O)O
CHEMBL218424	Cc1cccc(COCc2ccc(nc2)n3cc(cn3)C(=O)O)c1
CHEMBL220695	OC(=O)c1cnn(c1)c2ccc(cn2)c3ccc(Cl)cc3
CHEMBL220743	OC(=O)c1cnn(c1)c2ccccn2
CHEMBL220796	OC(=O)c1cnn(c1)c2ccc(cn2)c3cccc(Cl)c3
CHEMBL221012	OC(=O)c1cnn(c1)c2ccc(COCc3ccc(Cl)cc3)cn2
CHEMBL221013	OC(=O)c1cnn(c1)c2ccc(COCc3cccc(Cl)c3)cn2
CHEMBL221189	OC(=O)c1cnn(c1)c2ccc(COCc3ccccc3)cn2
CHEMBL221232	OC(=O)c1cnn(c1)c2ccc(cn2)c3ccccc3Cl
CHEMBL221241	CC(C)c1ccc(COCc2ccc(nc2)n3cc(cn3)C(=O)O)cc1
CHEMBL221316	CC(C)c1ccc(cc1)c2ccc(nc2)n3cc(cn3)C(=O)O
CHEMBL2218401	Cc1nn(c(C)c1CC(=O)NCc2ccc(F)cc2Cl)c3ccccn3
CHEMBL2218405	Cc1nn(c(C)c1CC(=O)NCc2ccc(F)cc2Cl)c3ccc(cn3)C#N
CHEMBL2218406	Cc1nn(c(C)c1CC(=O)NCc2ccc(F)cc2Cl)c3ncc(Cl)cc3Cl
CHEMBL2218408	Cc1nn(c(C)c1CC(=O)NCc2ccc(F)cc2Cl)c3ccc(Cl)cn3
CHEMBL2218413	Cc1nn(c(C)c1CC(=O)NCc2ccc(F)cc2Cl)c3ncccc3C(F)(F)F
CHEMBL221861	OC(=O)c1cnn(c1)c2ccc(cn2)c3cccs3
CHEMBL2218613	CCOc1cccc(n1)n2cc(CC(=O)NCc3ccc(F)cc3Cl)cn2
CHEMBL222009	OC(=O)c1cnn(c1)c2ccc(cn2)c3cncnc3
CHEMBL222010	COc1ccc(cc1)c2ccc(nc2)n3cc(cn3)C(=O)O
CHEMBL222114	COc1ccc(COCc2ccc(nc2)n3cc(cn3)C(=O)O)cc1
CHEMBL222115	OC(=O)c1cnn(c1)c2ccc(COCc3ccc(cc3)c4ccccc4C#N)cn2
CHEMBL2227702	CC(C)NC(=O)c1cc(Cl)cc(C)c1NC(=O)c2cc(COC(=O)C)nn2c3ncccc3Cl
CHEMBL2229660	CNC(=O)c1cc(Cl)cc(C)c1NC(=O)NC(=O)c2cc(nn2c3ncccc3Cl)C(F)(F)F
CHEMBL2229661	Cc1cc(Cl)cc(C(=O)NC2CC2)c1NC(=O)NC(=O)c3cc(nn3c4ncccc4Cl)C(F)(F)F
CHEMBL2229662	CCCCNC(=O)c1cc(Cl)cc(C)c1NC(=O)NC(=O)c2cc(nn2c3ncccc3Cl)C(F)(F)F
CHEMBL2229663	Cc1cc(Cl)cc(C(=O)NC(C)(C)C)c1NC(=O)NC(=O)c2cc(nn2c3ncccc3Cl)C(F)(F)F
CHEMBL2229664	Cc1cc(Cl)cc(C(=O)NC2CCCCC2)c1NC(=O)NC(=O)c3cc(nn3c4ncccc4Cl)C(F)(F)F
CHEMBL2229665	CC(C)NC(=O)c1cc(Cl)cc(C)c1NC(=O)NC(=O)c2cc(nn2c3ncccc3Cl)C(F)(F)F
CHEMBL2229666	Cc1cc(Br)cc(C(=O)NC2CC2)c1NC(=O)NC(=O)c3cc(nn3c4ncccc4Cl)C(F)(F)F
CHEMBL2229666	Cc1cc(Br)cc(C(=O)NC2CC2)c1NC(=O)NC(=O)c3cc(nn3c4ncccc4Cl)C(F)(F)F
CHEMBL2229667	CCCNC(=O)c1cc(Cl)ccc1NC(=O)NC(=O)c2cc(nn2c3ncccc3Cl)C(F)(F)F
CHEMBL2229668	Cc1cccc(C(=O)NC2CC2)c1NC(=O)NC(=O)c3cc(nn3c4ncccc4Cl)C(F)(F)F
CHEMBL2229669	FC(F)(F)c1cc(C(=O)NC(=O)Nc2ccc(Cl)cc2C(=O)NC3CC3)n(n1)c4ncccc4Cl
CHEMBL2229670	CCCNC(=O)c1cccc(C)c1NC(=O)NC(=O)c2cc(nn2c3ncccc3Cl)C(F)(F)F
CHEMBL2229671	CC(C)NC(=O)c1cc(Cl)cc(C)c1NC(=S)NC(=O)c2cc(Cl)nn2c3ncccc3Cl
CHEMBL2229673	CC(C)NC(=O)c1cccc(C)c1NC(=S)NC(=O)c2cc(Cl)nn2c3ncccc3Cl
CHEMBL2229674	CC(C)CCNC(=O)c1cccc(C)c1NC(=S)NC(=O)c2cc(Cl)nn2c3ncccc3Cl
CHEMBL2229675	CNC(=O)c1cc(Cl)cc(C)c1NC(=S)NC(=O)c2cc(Br)nn2c3ncccc3Cl
CHEMBL2229676	CC(C)NC(=O)c1cc(Br)cc(C)c1NC(=S)NC(=O)c2cc(Br)nn2c3ncccc3Cl
CHEMBL2229677	Cc1cc(Cl)cc(C(=O)NC(C)(C)C)c1NC(=S)NC(=O)c2cc(Br)nn2c3ncccc3Cl
CHEMBL2229678	Cc1cc(Cl)cc(C(=O)NC2CCCCC2)c1NC(=S)NC(=O)c3cc(Br)nn3c4ncccc4Cl
CHEMBL2229679	CC(C)CCNC(=O)c1cccc(C)c1NC(=S)NC(=O)c2cc(Br)nn2c3ncccc3Cl
CHEMBL2229680	CNC(=O)c1cc(Cl)cc(C)c1NC(=S)NC(=O)c2cc(nn2c3ncccc3Cl)C(F)(F)F
CHEMBL2229681	CCNC(=O)c1cc(Cl)cc(C)c1NC(=S)NC(=O)c2cc(nn2c3ncccc3Cl)C(F)(F)F
CHEMBL2229682	Cc1cc(Cl)cc(C(=O)NC2CCCCC2)c1NC(=S)NC(=O)c3cc(nn3c4ncccc4Cl)C(F)(F)F
CHEMBL2229683	Cc1cc(Cl)cc(C(=O)NC2CC2)c1NC(=S)NC(=O)c3cc(nn3c4ncccc4Cl)C(F)(F)F
CHEMBL2229684	Cc1cc(Br)cc(C(=O)NCc2ccccc2)c1NC(=S)NC(=O)c3cc(nn3c4ncccc4Cl)C(F)(F)F
CHEMBL2229685	CNC(=O)c1cc(Cl)cc(C)c1NC(=S)NC(=O)c2cc(Cl)nn2c3ncccc3Cl
CHEMBL2229915	CNC(=O)c1cc(Cl)cc(C)c1NC(=O)c2cc(CNS(=O)(=O)C)nn2c3ncccc3Cl
CHEMBL2229916	CNC(=O)c1cc(Cl)cc(C)c1NC(=O)c2cc(CNC(=O)C(F)(F)F)nn2c3ncccc3Cl
CHEMBL2229917	CNC(=O)c1cc(Cl)cc(C)c1NC(=O)c2cc(CNC(=O)c3ccccc3)nn2c4ncccc4Cl
CHEMBL2229918	CNC(=O)c1cc(Cl)cc(C)c1NC(=O)c2cc(CNC(=O)C)nn2c3ncccc3Cl
CHEMBL2229919	CNC(=O)c1cc(Cl)cc(C)c1NC(=O)c2cc(CN)nn2c3ncccc3Cl
CHEMBL2229920	CNC(=O)c1cc(Cl)cc(C)c1NC(=O)c2cc(CN=[N+]=[N-])nn2c3ncccc3Cl
CHEMBL2229921	CNC(=O)c1cc(Cl)cc(C)c1NC(=O)c2cc(C=O)nn2c3ncccc3Cl
CHEMBL2229922	CNC(=O)c1cc(Cl)cc(C)c1NC(=O)c2cc(CO)nn2c3ncccc3Cl
CHEMBL2229923	CNC(=O)c1cc(Cl)cc(C)c1NC(=O)c2cc(COC(=O)c3ccccc3)nn2c4ncccc4Cl
CHEMBL2229924	CNC(=O)c1cc(Cl)cc(C)c1NC(=O)c2cc(COC(=O)COC(=O)C)nn2c3ncccc3Cl
CHEMBL2229925	CNC(=O)c1cc(Cl)cc(C)c1NC(=O)c2cc(COC(=O)CCCCl)nn2c3ncccc3Cl
CHEMBL2229926	CNC(=O)c1cc(Cl)cc(C)c1NC(=O)c2cc(COC(=O)C(F)(F)F)nn2c3ncccc3Cl
CHEMBL2229927	CNC(=O)c1cc(Cl)cc(C)c1NC(=O)c2cc(COS(=O)(=O)c3ccc(C)cc3)nn2c4ncccc4Cl
CHEMBL2229928	CNC(=O)c1cc(Cl)cc(C)c1NC(=O)c2cc(COS(=O)(=O)C)nn2c3ncccc3Cl
CHEMBL2229929	CCCNC(=O)c1cccc(C)c1NC(=O)c2cc(COC(=O)C)nn2c3ncccc3Cl
CHEMBL2229930	CC(=O)OCc1cc(C(=O)Nc2c(C)cccc2C(=O)NC3CC3)n(n1)c4ncccc4Cl
CHEMBL2229931	CC(C)NC(=O)c1cccc(C)c1NC(=O)c2cc(COC(=O)C)nn2c3ncccc3Cl
CHEMBL2229932	CNC(=O)c1cccc(C)c1NC(=O)c2cc(COC(=O)C)nn2c3ncccc3Cl
CHEMBL2229933	CC(=O)OCc1cc(C(=O)Nc2c(C)cc(Cl)cc2C(=O)NCc3ccccc3)n(n1)c4ncccc4Cl
CHEMBL2229934	CONC(=O)c1cc(Cl)cc(C)c1NC(=O)c2cc(COC(=O)C)nn2c3ncccc3Cl
CHEMBL2229935	CC(=O)OCc1cc(C(=O)Nc2c(C)cc(Cl)cc2C(=O)NC3CC3)n(n1)c4ncccc4Cl
CHEMBL2229936	CC(=O)OCc1cc(C(=O)Nc2c(C)cc(Cl)cc2C(=O)NC(C)(C)C)n(n1)c3ncccc3Cl
CHEMBL2229937	CNC(=O)c1cc(Cl)cc(C)c1NC(=O)c2cc(COC(=O)C)nn2c3ncccc3Cl
CHEMBL2229938	CCCCNC(=O)c1cc(C(=O)Nc2c(C)cc(Cl)cc2C(=O)NC)n(n1)c3ncccc3Cl
CHEMBL2229939	CNC(=O)c1cc(Cl)cc(C)c1NC(=O)c2cc(nn2c3ncccc3Cl)C(=O)NC4CCCCC4
CHEMBL2229940	CNC(=O)c1cc(Cl)cc(C)c1NC(=O)c2cc(nn2c3ncccc3Cl)C(=O)Nc4ccccc4
CHEMBL2229941	CNC(=O)c1cc(Cl)cc(C)c1NC(=O)c2cc(nn2c3ncccc3Cl)C(=O)NC(C)(C)C
CHEMBL2229942	CNC(=O)c1cc(Cl)cc(C)c1NC(=O)c2cc(nn2c3ncccc3Cl)C(=O)NC(C)C
CHEMBL2229943	CNC(=O)c1cc(Cl)cc(C)c1NC(=O)c2cc(nn2c3ncccc3Cl)C(=O)NCc4ccccc4
CHEMBL2229944	CCCCNC(=O)c1cc(Cl)cc(C)c1NC(=O)c2cc(nn2c3ncccc3Cl)C(=O)NC
CHEMBL2229945	CNC(=O)c1cc(C(=O)Nc2c(C)cc(Cl)cc2C(=O)NCc3ccccc3)n(n1)c4ncccc4Cl
CHEMBL2229946	CNC(=O)c1cc(C(=O)Nc2c(C)cc(Cl)cc2C(=O)NOC)n(n1)c3ncccc3Cl
CHEMBL2229947	CNC(=O)c1cc(C(=O)Nc2c(C)cc(Cl)cc2C(=O)NC3CC3)n(n1)c4ncccc4Cl
CHEMBL2229948	CNC(=O)c1cc(C(=O)Nc2c(C)cc(Cl)cc2C(=O)NC(C)(C)C)n(n1)c3ncccc3Cl
CHEMBL2229949	CNC(=O)c1cc(C(=O)Nc2c(C)cc(Cl)cc2C(=O)NC(C)C)n(n1)c3ncccc3Cl
CHEMBL2229950	CNC(=O)c1cc(C(=O)Nc2c(C)cc(Cl)cc2C(=O)NC)n(n1)c3ncccc3Cl
CHEMBL2229951	CNC(=O)c1cc(Cl)cc(C)c1NC(=O)c2cc(nn2c3ncccc3Cl)C(=O)OC4CCCCC4
CHEMBL2229952	CNC(=O)c1cc(Cl)cc(C)c1NC(=O)c2cc(nn2c3ncccc3Cl)C(=O)OCc4ccccc4
CHEMBL2229953	CNC(=O)c1cc(Cl)cc(C)c1NC(=O)c2cc(nn2c3ncccc3Cl)C(=O)OC(C)C
CHEMBL2229954	CCOC(=O)c1cc(C(=O)Nc2c(C)cc(Cl)cc2C(=O)NCc3ccccc3)n(n1)c4ncccc4Cl
CHEMBL2229955	CCOC(=O)c1cc(C(=O)Nc2c(C)cccc2C(=O)NC(C)C)n(n1)c3ncccc3Cl
CHEMBL2229956	CCCNC(=O)c1cccc(C)c1NC(=O)c2cc(nn2c3ncccc3Cl)C(=O)OCC
CHEMBL2229957	CCCCOC(=O)c1cc(C(=O)Nc2c(C)cc(Cl)cc2C(=O)NC)n(n1)c3ncccc3Cl
CHEMBL2229958	CCOC(=O)c1cc(C(=O)Nc2c(C)cc(Cl)cc2C(=O)NC(C)C)n(n1)c3ncccc3Cl
CHEMBL2229959	CCOC(=O)c1cc(C(=O)Nc2c(C)cc(Cl)cc2C(=O)NC(C)(C)C)n(n1)c3ncccc3Cl
CHEMBL2229960	CCOC(=O)c1cc(C(=O)Nc2c(C)cc(Cl)cc2C(=O)NC3CC3)n(n1)c4ncccc4Cl
CHEMBL2229961	CCOC(=O)c1cc(C(=O)Nc2c(C)cc(Cl)cc2C(=O)NOC)n(n1)c3ncccc3Cl
CHEMBL2229962	CCOC(=O)c1cc(C(=O)Nc2c(C)cc(Cl)cc2C(=O)NC)n(n1)c3ncccc3Cl
CHEMBL2235359	CCOC(=O)c1cnn(c2ccc3ccccc3n2)c1c4ccccc4
CHEMBL2253179	Clc1cccc(NC(=O)c2cc(Br)nn2c3ncccc3Cl)c1
CHEMBL2253180	Fc1ccc(NC(=O)c2cc(Br)nn2c3ncccc3Cl)cc1
CHEMBL2253181	Clc1ccc(NC(=O)c2cc(Br)nn2c3ncccc3Cl)cc1
CHEMBL2253182	Clc1cccnc1n2nc(Br)cc2C(=O)Nc3ccc(I)cc3
CHEMBL2253183	[O-][N+](=O)c1ccc(NC(=O)c2cc(Br)nn2c3ncccc3Cl)cc1
CHEMBL2253184	CCOc1ccc(NC(=O)c2cc(Br)nn2c3ncccc3Cl)cc1
CHEMBL2253185	Fc1ccc(NC(=O)c2cc(Br)nn2c3ncccc3Cl)cc1Cl
CHEMBL2253186	Cc1ccc(NC(=O)c2cc(Br)nn2c3ncccc3Cl)c(C)c1
CHEMBL2253187	Cc1cc(ccc1NC(=O)c2cc(Br)nn2c3ncccc3Cl)[N+](=O)[O-]
CHEMBL2253188	Cc1cccc(C)c1NC(=O)c2cc(Br)nn2c3ncccc3Cl
CHEMBL2253189	Cc1cccc(c1NC(=O)c2cc(Br)nn2c3ncccc3Cl)[N+](=O)[O-]
CHEMBL2253190	[O-][N+](=O)c1ccc(NC(=O)c2cc(Br)nn2c3ncccc3Cl)c(Cl)c1
CHEMBL2253191	[O-][N+](=O)c1ccc(NC(=O)c2cc(Br)nn2c3ncccc3Cl)c(Br)c1
CHEMBL2253192	[O-][N+](=O)c1cc(Cl)ccc1NC(=O)c2cc(Br)nn2c3ncccc3Cl
CHEMBL2253193	Clc1ccc(Cl)c(NC(=O)c2cc(Br)nn2c3ncccc3Cl)c1
CHEMBL2253194	Cc1cc(Cl)cc(C)c1NC(=O)c2cc(Br)nn2c3ncccc3Cl
CHEMBL2253195	Cc1cc(Br)cc(C)c1NC(=O)c2cc(Br)nn2c3ncccc3Cl
CHEMBL2253196	Cc1cc(cc(Cl)c1NC(=O)c2cc(Br)nn2c3ncccc3Cl)[N+](=O)[O-]
CHEMBL2253197	Cc1cc(Cl)cc(c1NC(=O)c2cc(Br)nn2c3ncccc3Cl)[N+](=O)[O-]
CHEMBL2285699	Cc1cc(Cl)cc(C(=O)NC(C)(C)CS(=N)(=O)C)c1NC(=O)c2cc(OCC(F)(F)F)nn2c3ncccc3Cl
CHEMBL2286761	CNC(=O)c1cc(cc(C)c1NC(=O)c2cc(Br)nn2c3ncccc3Cl)C#N
CHEMBL2288186	CNS(=N)(=O)CC(C)NC(=O)c1cc(Cl)cc(C)c1NC(=O)c2cc(Br)nn2c3ncccc3Cl
CHEMBL2288187	CN=S(=O)(CC(C)NC(=O)c1cc(cc(C)c1NC(=O)c2cc(Br)nn2c3ncccc3Cl)C#N)NN(C)C
CHEMBL2288188	CONS(=O)(=NC)CC(C)NC(=O)c1cc(cc(C)c1NC(=O)c2cc(Br)nn2c3ncccc3Cl)C#N
CHEMBL2288189	Cc1cc(cc(C(=O)NC(C)(C)CS(=O)(=N[N+](=O)[O-])C)c1NC(=O)c2cc(Br)nn2c3ncccc3Cl)C#N
CHEMBL2288190	CNS(=N)(=O)CC(C)NC(=O)c1cc(cc(C)c1NC(=O)c2cc(Br)nn2c3ncccc3Cl)C#N
CHEMBL2288191	Cc1cc(Cl)cc(C(=O)NC(C)(C)CS(=O)(=NC#N)C)c1NC(=O)c2cc(nn2c3ncccc3Cl)C(F)(F)F
CHEMBL2288192	Cc1cc(cc(C(=O)NC(C)(C)CS(=N)(=O)C)c1NC(=O)c2cc(Br)nn2c3ncccc3Cl)C#N
CHEMBL2288193	Cc1cc(cc(C(=O)NC(C)(C)CS(=O)(=NC#N)C)c1NC(=O)c2cc(Br)nn2c3ncccc3Cl)C#N
CHEMBL2288194	Cc1cc(Cl)cc(C(=O)NC(C)(C)CS(=N)(=O)C)c1NC(=O)c2cc(nn2c3ncccc3Cl)C(F)(F)F
CHEMBL2288195	Cc1cc(cc(C(=O)NC(C)(C)CS(=N)(=O)C)c1NC(=O)c2cc(OCC(F)(F)F)nn2c3ncccc3Cl)C#N
CHEMBL2288266	Cc1cc(C)n(n1)c2ccc3ccccc3n2
CHEMBL2288267	Cc1cc(C)n(n1)c2cc(C)c3ccccc3n2
CHEMBL2296731	Cc1cc(nc2ccccc12)n3nc(N)c(\N=N\c4ccc(F)cc4)c3N
CHEMBL2325271	O=S(=O)(Nc1nccs1)c2ccc(Oc3cc(nn3c4ccccn4)C5CC5)c(c2)C#N
CHEMBL2326425	FC(F)(F)c1ccn(n1)c2ccc(Oc3ccc(cc3C#N)S(=O)(=O)Nc4nccs4)cn2
CHEMBL2332341	Fc1cnc(c2[nH]cc(C(=O)C(=O)N3CCN(CC3)C(=O)c4ccccc4)c12)n5cccn5
CHEMBL2332342	Cc1ccn(n1)c2ncc(F)c3c(c[nH]c23)C(=O)C(=O)N4CCN(CC4)C(=O)c5ccccc5
CHEMBL2332343	Cc1ccnn1c2ncc(F)c3c(c[nH]c23)C(=O)C(=O)N4CCN(CC4)C(=O)c5ccccc5
CHEMBL2338244	CC1(C)CCN([C@@H]2C3CC4CC2C[C@](O)(C4)C3)C(=O)c5cnn(c6ccccn6)c15
CHEMBL2338262	O[C@@]12CC3CC(C1)[C@H](C(C3)C2)N4CCCc5c(cnn5c6ccccn6)C4=O
CHEMBL2367469	O[C@@H]1C[C@H](OC(=O)C1)\C=C\c2c(c3ccc(F)cc3)n(nc2C(F)(F)F)c4ccccn4
CHEMBL2367476	CC(C)c1nn(c2ccc3ccccc3n2)c(c1\C=C\[C@@H]4C[C@@H](O)CC(=O)O4)c5ccc(F)cc5
CHEMBL237543	OC(=O)c1ccccc1NC(=O)CCc2ccn(n2)c3ccc(O)cn3
CHEMBL2376927	Clc1ccccc1Nc2ccc3c(cnn3c4cccc(n4)C(=O)NCCN5CCOCC5)c2
CHEMBL2376930	Clc1ccccc1Nc2ccc3c(cnn3c4cc(ccn4)C(=O)NCCN5CCOCC5)c2
CHEMBL238113	CC1CN(CCN1S(=O)(=O)c2c[nH]c3c(nccc23)n4cccn4)C(=O)c5ccccc5
CHEMBL2381822	CCCC(Nc1ccc(nc1)n2cc(cn2)C(F)(F)F)c3ccc(cc3)C(=O)NCCC(=O)O
CHEMBL2381829	CCCC(Oc1ccc(nc1)n2cc(cn2)C(F)(F)F)c3ccc(cc3)C(=O)NCCC(=O)O
CHEMBL239796	CC(C)(C)CNc1cc(nn1c2ccc(cn2)S(=O)(=O)C)C(F)(F)F
CHEMBL2401979	Cc1ccc(cc1NC(=O)c2cnn(c2C)c3ncccc3C(F)(F)F)C(=O)NC4CC4
CHEMBL2407225	CCC(=O)Nc1cc(CNc2c(C#N)c(C)nn2c3ccccn3)cc(Cl)c1O
CHEMBL2407227	CCC(=O)Nc1cc(CNc2c(C#N)c(C)nn2c3nccc4ccccc34)cc(Cl)c1O
CHEMBL2409109	Cc1cc(NC(=O)Nc2ccc(F)c(F)c2)n(n1)c3ccccn3
CHEMBL241743	CS(=O)(=O)c1ccc(nc1)n2nc(cc2OCC3CCC3)C(F)(F)F
CHEMBL241744	CC(C)(C)COc1cc(nn1c2ccc(cn2)S(=O)(=O)C)C(F)(F)F
CHEMBL241937	Clc1ccccc1C(=O)Nc2c(Br)c(nn2c3ccccn3)C(=O)NCCC4CCN(CC4)c5ccncc5
CHEMBL2426647	CC(C)(C(c1ccccc1)c2ccc3c(cnn3c4ccccn4)c2)C(=O)Nc5nncs5
CHEMBL2436458	CN1CCC(CC1)Nc2ccc3ncc(c4cnn(c4)c5ccc(F)cn5)n3n2
CHEMBL2436463	CN1CCC(CC1)Nc2ccc3ncc(c4cnn(c4)c5ncccc5F)n3n2
CHEMBL2448721	CO\N=C(/C)\c1ccc(c(NC(=O)c2cnn(c2)c3ccccn3)c1)n4ccnc4
CHEMBL245440	CS(=O)(=O)c1ccc(nc1)n2nc(cc2NCC3CC3)C(F)(F)F
CHEMBL245442	CS(=O)(=O)c1ccc(nc1)n2nc(cc2NC3CCCC3)C(F)(F)F
CHEMBL245608	CC(C)(C)COc1c(C#N)c(nn1c2ccc(cn2)S(=O)(=O)C)C(F)(F)F
CHEMBL245641	CS(=O)(=O)c1ccc(nc1)n2nc(C(F)F)c(C#N)c2NC3CCCC3
CHEMBL245991	CC1=Nc2c(cnn2c3ccccn3)C(=O)N1c4ccc(Cl)cc4
CHEMBL247870	CS(=O)(=O)c1ccc(nc1)n2nc(c(C#N)c2c3ccccc3)C(F)(F)F
CHEMBL247896	CS(=O)(=O)c1ccc(nc1)n2nc(C(F)F)c(C#N)c2c3ccccc3
CHEMBL248097	C[C@@H]1CN([C@H](C)CO1)c2cc(nn2c3ccc(cn3)S(=O)(=O)C)C(F)(F)F
CHEMBL248302	C[C@@H]1CN([C@H](C)CO1)c2c(C#N)c(nn2c3ccc(cn3)S(=O)(=O)C)C(F)F
CHEMBL248303	CC1CCCN(C1)c2cc(nn2c3ccc(cn3)S(=O)(=O)C)C(F)(F)F
CHEMBL248502	CC1CCCN(C1)c2c(C#N)c(nn2c3ccc(cn3)S(=O)(=O)C)C(F)(F)F
CHEMBL248504	CS(=O)(=O)c1ccc(nc1)n2nc(cc2NC3CCC3)C(F)(F)F
CHEMBL248580	CNC(=O)c1cc(Cl)cc(C)c1NC(=O)c2cc(Cl)nn2c3ncccc3Cl
CHEMBL248789	CNC(=O)c1cc(cc(C)c1NC(=O)c2cc(nn2c3ncccc3Cl)C(F)(F)F)C(F)(F)F
CHEMBL248979	COc1cc(C(=O)Nc2c(C)cc(Cl)cc2C(=O)NC(C)C)n(n1)c3ncccc3Cl
CHEMBL248989	CNC(=O)c1cc(Cl)cc(C)c1NC(=O)c2cc(OC(F)F)nn2c3ncccc3Cl
CHEMBL248990	CC(C)NC(=O)c1cc(Cl)cc(C)c1NC(=O)c2cc(OC(F)F)nn2c3ncccc3Cl
CHEMBL251207	CNC(=O)c1cc(I)cc(C)c1NC(=O)c2cc(nn2c3ncccc3Cl)C(F)(F)F
CHEMBL253000	CS(=O)(=O)c1ccc(nc1)n2nc(cc2c3ccncc3)C(F)(F)F
CHEMBL253008	CC(C)Cc1cc(nn1c2ccc(cn2)S(=O)(=O)C)C(F)(F)F
CHEMBL253639	CS(=O)(=O)c1ccc(nc1)n2nc(cc2c3ccccn3)C(F)(F)F
CHEMBL254260	CS(=O)(=O)c1ccc(nc1)n2nc(cc2c3ccccc3F)C(F)(F)F
CHEMBL255506	Cc1cc(Oc2ccccc2NC(=O)Nc3ccc(OC(F)(F)F)cc3)n(n1)c4ccccn4
CHEMBL258653	CNC(=O)c1ccc(C)c(Nc2ncnc3c2cnn3c4ccccn4)c1
CHEMBL259089	CNC(=O)c1cc(Cl)cc(Cl)c1NC(=O)c2cc(F)nn2c3ncccc3Cl
CHEMBL259090	CNC(=O)c1cc(Cl)cc(C)c1NC(=O)c2cc(F)nn2c3ncccc3Cl
CHEMBL259914	CNC(=O)c1cc(F)cc(Cl)c1NC(=O)c2cc(Br)nn2c3ncccc3Cl
CHEMBL260053	CNC(=O)c1cc(F)cc(F)c1NC(=O)c2cc(F)nn2c3ncccc3Cl
CHEMBL260496	CNC(=O)c1cc(Cl)cc(Cl)c1NC(=O)c2cc(Br)nn2c3ncccc3F
CHEMBL260857	CNC(=O)c1cc(Cl)cc(Cl)c1NC(=O)c2cc(nn2c3ncccc3Cl)C(F)(F)F
CHEMBL261213	CNC(=O)c1cc(Cl)cc(Cl)c1NC(=O)c2cc(Br)nn2c3ncccc3Cl
CHEMBL261525	CCCN1C(=O)N(CC)c2nc([nH]c2C1=O)c3cnn(c3)c4ccccn4
CHEMBL262431	FC(F)(F)c1cccc(c1)C(=O)N2CCC(CNCc3cccc(n3)n4cccn4)CC2
CHEMBL263886	CC[C@H]1OC(=O)[C@H](C)C(=O)[C@H](C)[C@@H](O[C@@H]2O[C@H](C)C[C@@H]([C@H]2O)N(C)C)[C@@]3(C)C[C@@H](C)\C(=N/C(=O)C)\[C@H](C)[C@@H](OC\C(=N/OCc4ccc(nc4)n5cccn5)\CO3)[C@]1(C)O
CHEMBL264572	CCCCCSc1c(C#N)c(nn1c2ccc(cn2)S(=O)(=O)C)C(F)(F)F
CHEMBL269093	COc1cccc(COCc2ccc(nc2)n3cc(cn3)C(=O)O)c1
CHEMBL277777	CNC(=O)c1cc(F)cc(Cl)c1NC(=O)c2cc(F)nn2c3ncccc3Cl
CHEMBL287792	COc1ccc2c(O[C@@H]3C[C@@H]4N(C3)C(=O)[C@H](CCCCC\C=C/[C@@H]5C[C@]5(NC4=O)C(=O)O)NC(=O)OC(C)(C)C)cc(nc2c1)n6cccn6
CHEMBL291153	COc1ccc2c(O[C@@H]3C[C@@H]4N(C3)C(=O)[C@H](CCCCC\C=C/[C@@H]5C[C@]5(NC4=O)C(=O)O)NC(=O)OC(C)(C)C)cc(nc2c1)n6cc(C)cn6
CHEMBL295025	Clc1ccc(cc1Cl)C(=O)N2CCC(CNCc3cccc(n3)n4cccn4)CC2
CHEMBL295765	Cc1cc(c2ccc(NS(=O)(=O)C)cc2)n(n1)c3ccc(cn3)[N+](=O)[O-]
CHEMBL296902	CS(=O)(=O)Nc1ccc(cc1)c2cc(nn2c3ccc(cn3)[N+](=O)[O-])C(F)(F)F
CHEMBL297208	Clc1ccc(cc1Cl)C(=O)N2CCC(CNCc3cccc(n3)n4cccn4)(CC2)C#N
CHEMBL302471	OC(=O)c1cc(c2ccc(cc2)c3ccc(Cl)cc3Cl)n(n1)c4ccccn4
CHEMBL302490	COc1cccc(n1)n2ncc3c(N\N=C\c4ccncc4)ncnc23
CHEMBL304339	N(\N=C\c1ccncc1)c2ncnc3c2cnn3c4ccccn4
CHEMBL307462	COc1ccc(cc1)S(=O)(=O)Nc2ccc(cc2)c3cc(N)n(n3)c4ccccn4
CHEMBL308349	Clc1ccc(c(Cl)c1)c2ccc(cc2)c3cc(nn3c4ccccn4)n5cnnn5
CHEMBL3092144	Cc1c(nn(c2cccc(n2)C(=O)O)c1c3ccccc3)c4ccccc4
CHEMBL3112942	Clc1ccc(Oc2cccc(CN3CCC4(CC3)CN(C4)C(=O)Nc5ccc(nc5)n6cccn6)c2)cc1
CHEMBL3113750	COc1cccc(OC)c1C2CCCC(=O)N2Cc3ccnc(c3)n4cccn4
CHEMBL312303	Cc1cc(nn1c2ccccn2)C(=O)Nc3cc(Cl)cc(Cl)c3
CHEMBL3126672	COc1c(cc(Cc2ccc(nc2)n3cccn3)c4ccccc14)C(=O)N[C@H]5CCCC[C@@H]5O
CHEMBL317917	CCCOc1c(cnn1c2ccccn2)c3csc(n3)c4cc(sc4SC)C(=N)N
CHEMBL3192006	COC(=O)c1ccccc1\N=C\C2=C(O)c3c(C)nn(c3CC2)c4ccccn4
CHEMBL3192169	Oc1c(\C=N\c2cccc(c2)C(F)(F)F)cnn1c3cccc(Cl)n3
CHEMBL3196221	Oc1c(\C=N\c2ccc(Oc3ccccc3)cc2)cnn1c4cccc(Cl)n4
CHEMBL3196935	CN(C)\C=N\c1c(cnn1c2ccc(cn2)C(F)(F)F)C#N
CHEMBL3199049	C\C(=N/OC(=O)Nc1ccccc1)\c2cnn(c2C)c3cc(cc(C)n3)C(F)(F)F
CHEMBL3199056	Oc1c(\C=N\c2ccc(Cl)cc2)cnn1c3cccc(Cl)n3
CHEMBL3210919	COc1ccc(NC2=C(CCc3c2c(C)nn3c4ccccn4)\C=N\c5ccc(OC)cc5)cc1
CHEMBL3221481	COCC[C@H](Oc1ncnc2c1cnn2c3ncccc3Cl)C(=O)Nc4ccc(C)cn4
CHEMBL3221483	COC[C@H](Oc1ncnc2c1cnn2c3ncccc3Cl)C(=O)Nc4ccc(C)cn4
CHEMBL3221484	COC[C@H](Oc1ncnc2c1cnn2c3ncccc3Cl)C(=O)Nc4cnc(C)cn4
CHEMBL3221485	CCOC[C@H](Oc1ncnc2c1cnn2c3ncccc3Cl)C(=O)Nc4ccc(C)cn4
CHEMBL3221487	CCOC[C@H](Oc1ncnc2c1cnn2c3ncccc3Cl)C(=O)Nc4cnc(C)cn4
CHEMBL3221489	CC(C)OC[C@H](Oc1ncnc2c1cnn2c3ncccc3Cl)C(=O)Nc4ccc(C)cn4
CHEMBL3221490	Cc1ccc(NC(=O)[C@H](COC2CCC2)Oc3ncnc4c3cnn4c5ncccc5Cl)nc1
CHEMBL3221492	Cc1cnc(NC(=O)[C@H](COC2CCC2)Oc3ncnc4c3cnn4c5ncccc5Cl)cn1
CHEMBL3221493	CC(C)OC[C@H](Oc1ncnc2c1cnn2c3ncccc3Cl)C(=O)Nc4ccc(Cl)cn4
CHEMBL3221495	CCOC[C@H](Oc1ncnc2c1cnn2c3ncccc3Cl)C(=O)Nc4ccc(Cl)cn4
CHEMBL3221496	CC(C)OC[C@H](Oc1ncnc2c1cnn2c3ncccc3Cl)C(=O)Nc4ccc(F)cn4
CHEMBL3221498	CCOC[C@H](Oc1ncnc2c1cnn2c3ncccc3Cl)C(=O)Nc4ccc(F)cn4
CHEMBL3221499	CC(C)OC[C@H](Oc1ncnc2c1cnn2c3ncccc3Cl)C(=O)Nc4ccccn4
CHEMBL3221501	CCOC[C@H](Oc1ncnc2c1cnn2c3ncccc3Cl)C(=O)Nc4ccccn4
CHEMBL3221502	CC(C)OC[C@H](Oc1ncnc2c1cnn2c3ncccc3Cl)C(=O)Nc4ccc(cn4)C#N
CHEMBL3221504	CCOC[C@H](Oc1ncnc2c1cnn2c3ncccc3Cl)C(=O)Nc4ccc(cn4)C#N
CHEMBL3221505	Cc1ccc(NC(=O)[C@H](CCO)Oc2ncnc3c2cnn3c4ncccc4Cl)nc1
CHEMBL3221506	OCCOC[C@H](Oc1ncnc2c1cnn2c3ncccc3Cl)C(=O)Nc4ccc(Cl)cn4
CHEMBL3221507	OCCOC[C@H](Oc1ncnc2c1cnn2c3ncccc3Cl)C(=O)Nc4ccc(cn4)C#N
CHEMBL3221509	C[C@@H](CO)OC[C@H](Oc1ncnc2c1cnn2c3ncccc3Cl)C(=O)Nc4ccc(Cl)cn4
CHEMBL3221510	C[C@@H](CO)OC[C@H](Oc1ncnc2c1cnn2c3ncccc3Cl)C(=O)Nc4ccc(F)cn4
CHEMBL3221511	C[C@@H](CO)OC[C@H](Oc1ncnc2c1cnn2c3ncccc3Cl)C(=O)Nc4ccc(cn4)C#N
CHEMBL3221512	C[C@H](CO)OC[C@H](Oc1ncnc2c1cnn2c3ncccc3Cl)C(=O)Nc4ccc(Cl)cn4
CHEMBL3221513	C[C@H](CO)OC[C@H](Oc1ncnc2c1cnn2c3ncccc3Cl)C(=O)Nc4ccc(F)cn4
CHEMBL3221514	C[C@H](CO)OC[C@H](Oc1ncnc2c1cnn2c3ncccc3Cl)C(=O)Nc4ccc(cn4)C#N
CHEMBL3221515	OC1CN(C[C@H](Oc2ncnc3c2cnn3c4ncccc4Cl)C(=O)Nc5ccc(Cl)cn5)C1
CHEMBL3221516	OC1CN(C[C@H](Oc2ncnc3c2cnn3c4ncccc4Cl)C(=O)Nc5ccc(F)cn5)C1
CHEMBL3230552	OC(=O)C1CCc2c(C1)cnn2c3ccccn3
CHEMBL3230561	OC(=O)C1CCc2nn(cc2C1)c3ccccn3
CHEMBL3235470	Cc1ccc(cc1)c2nn(c3ccc4ccccc4n3)c5ncncc25
CHEMBL3235471	Clc1ccc(cc1)c2nn(c3ccc4ccccc4n3)c5ncncc25
CHEMBL3235472	COc1ccc(cc1)c2nn(c3ccc4ccccc4n3)c5ncncc25
CHEMBL3236003	CC(C)(C)OC(=O)NCc1noc(n1)c2nn(c3ccccn3)c4ccccc24
CHEMBL3236309	NCc1noc(n1)c2nn(c3ccccn3)c4ccccc24
CHEMBL3236486	Cc1nn(cc1CN2CCC3(CC2)OCC(F)(F)c4cc(Cl)sc34)c5ncccc5c6ncc[nH]6
CHEMBL324134	Oc1c2cnc3CCCCc3c2nn1c4ccccn4
CHEMBL3262183	Cc1nn(c2NC(=O)C(=Cc12)CNCc3cccc(c3)C(F)(F)F)c4ccccn4
CHEMBL3325812	CCCC(=O)c1cnn(c1C)c2ccc(N)cn2
CHEMBL3337469	Cc1ccc(cc1)c2cc(nn2c3ccc4ccccc4n3)C(=O)N5CCN(CC5)c6cccc(n6)C(F)(F)F
CHEMBL3338794	Cc1ccc(cc1)c2cc(nn2c3ccc4ccccc4n3)C(=O)N5CCN(CC5)c6ccncc6
CHEMBL3338795	Cc1ccc(cc1)c2cc(nn2c3ccc4ccccc4n3)C(=O)N5CCN(CC5)c6ccccn6
CHEMBL3338796	Cc1ccc(cc1)c2cc(nn2c3ccc4ccccc4n3)C(=O)N5CCN(CC5)c6ncccc6C(F)(F)F
CHEMBL3338797	Cc1ccc(cc1)c2cc(nn2c3ccc4ccccc4n3)C(=O)N5CCN(CC5)c6ccc(cn6)C(F)(F)F
CHEMBL3338798	Cc1ccc(cc1)c2cc(nn2c3ccc4ccccc4n3)C(=O)N5CCN(CC5)c6ncc(cc6Cl)C(F)(F)F
CHEMBL3338799	Cc1ccc(cc1)c2cc(nn2c3ccc4ccccc4n3)C(=O)N5CCN(CC5)c6ncccc6C#N
CHEMBL3338800	Cc1ccc(cc1)c2cc(nn2c3ccc4ccccc4n3)C(=O)N5CCN(CC5)c6c(Cl)cncc6Cl
CHEMBL3338801	Cc1ccc(cc1)c2cc(nn2c3ccc4ccccc4n3)C(=O)Nc5ccncc5
CHEMBL3338802	Cc1ccc(cc1)c2cc(nn2c3ccc4ccccc4n3)C(=O)Nc5ccnc(Cl)c5
CHEMBL3338803	Cc1ccc(cc1)c2cc(nn2c3ccc4ccccc4n3)C(=O)Nc5ccncc5Br
CHEMBL3338804	Cc1ccc(cc1)c2cc(nn2c3ccc4ccccc4n3)C(=O)Nc5ncc(Br)cc5Br
CHEMBL3338805	Cc1ccc(cc1)c2cc(nn2c3ccc4ccccc4n3)C(=O)Nc5ccc(Cl)nc5Cl
CHEMBL3338806	COc1ncccc1NC(=O)c2cc(c3ccc(C)cc3)n(n2)c4ccc5ccccc5n4
CHEMBL3338807	Cc1ccc(cc1)c2cc(nn2c3ccc4ccccc4n3)C(=O)NCc5cccnc5
CHEMBL3342789	Clc1ccc(cc1)S(=O)(=O)Nc2ccnn2c3ccccn3
CHEMBL3342790	FC(F)(F)c1ccc(cc1)S(=O)(=O)Nc2ccnn2c3ccccn3
CHEMBL3342793	Fc1cc(Cl)ccc1S(=O)(=O)Nc2ccnn2c3ccccn3
CHEMBL3342794	Cc1ccnc(c1)n2nccc2NS(=O)(=O)c3ccc(cc3)C(F)(F)F
CHEMBL3342795	FC(F)(F)Sc1ccc(cc1)S(=O)(=O)Nc2ccnn2c3ccccn3
CHEMBL3342797	FC(F)(F)S(=O)(=O)c1ccc(cc1)S(=O)(=O)Nc2ccnn2c3ccccn3
CHEMBL3353207	Cc1ccc(nc1)n2nc(cc2NC(=O)c3cnn4cccnc34)N5CCN(CC5)C6CCCCCC6
CHEMBL3353208	Cc1ccc(nc1)n2nc(cc2NC(=O)c3cnn4cccnc34)N5CCN(CC5)C6CCOCC6
CHEMBL3353209	Cc1ccc(nc1)n2nc(cc2NC(=O)c3cnn4cccnc34)N5CCN(CC5)C6CCC6
CHEMBL3354944	CC(C)(NC(=O)c1nn(c2ccccn2)c3[C@@H]4C[C@@H]4Cc13)c5ccccc5
CHEMBL3354974	CC(C)(CO)NC(=O)c1nn(c2ccccn2)c3[C@@H]4C[C@@H]4Cc13
CHEMBL3409265	CCOc1nn(c(C)c1Cc2ccccc2)c3ccc(C)cn3
CHEMBL341628	Clc1cc(Cl)cc(c1)C(=O)N2CCC(CNCc3cccc(n3)n4cccn4)CC2
CHEMBL3437238	CC(C)NC(=O)N[C@H]1C[C@@H](C=C1)c2c(C)nn(c2C)c3ccccn3
CHEMBL3437480	Cc1nn(c(C)c1[C@H]2C[C@H](NC(=O)CCC(=O)O)C=C2)c3ccccn3
CHEMBL3438779	Cc1nn(c2NC(=O)CSC(c3cnn(C)c3)c12)c4ccccn4
CHEMBL3438941	Brc1cnn(c1)c2ncccc2NC(=O)C3CCCC3
CHEMBL3438942	Brc1cnn(c1)c2ccc(NC(=O)CC3CCCC3)cn2
CHEMBL3438944	Clc1cnn(c1)c2ccc(NC(=O)CC3CCCC3)cn2
CHEMBL3438965	Clc1cnn(c1)c2ncccc2NC(=O)C3CCCC3
CHEMBL3438966	Clc1cnn(c1)c2ncccc2NC(=O)C3CCCCC3
CHEMBL3438983	Clc1cnn(c1)c2ncccc2NC(=O)C3CC3
CHEMBL3443693	Cc1c(cnn1c2ccc(cn2)c3onc(n3)C(C)(C)C)C(=O)O
CHEMBL3443694	CC(C)c1noc(n1)c2ccc(nc2)n3ncc(C(=O)O)c3C
CHEMBL3443695	Cc1c(cnn1c2ccc(cn2)c3onc(n3)C4CC4)C(=O)O
CHEMBL3443696	CCCc1noc(n1)c2ccc(nc2)n3ncc(C(=O)O)c3C
CHEMBL3443697	Cc1noc(n1)c2ccc(nc2)n3ncc(C(=O)O)c3C
CHEMBL3448524	O=C(N1CCCC(C1)c2cnccn2)c3ccc(nc3)n4cccn4
CHEMBL3448637	O=C(N1CCC(C1)c2ccn[nH]2)c3ccc(nc3)n4cccn4
CHEMBL3448657	Cc1cncc(n1)C2CCN(CC2)C(=O)c3ccc(nc3)n4cccn4
CHEMBL3451531	CC(CNC(=O)c1cccc(n1)n2cccn2)Cn3ccnc3
CHEMBL3451838	CC(CN1CCCC1=O)NC(=O)Nc2cccnc2n3cccn3
CHEMBL3451840	CC(CN1CCOCC1)NC(=O)Nc2cccnc2n3cccn3
CHEMBL3451846	O=C(NCCN1CCCCCC1=O)Nc2cccnc2n3cccn3
CHEMBL3452560	CC(C)Cn1cnc(c1)S(=O)(=O)Nc2cccnc2n3cccn3
CHEMBL3452571	CCCn1cnc(c1)S(=O)(=O)Nc2cccnc2n3cccn3
CHEMBL3452576	CCn1cc(nc1C)S(=O)(=O)Nc2cccnc2n3cccn3
CHEMBL3453713	CCc1c(cnn1c2ccccn2)C(=O)N3CCOC(C)(C)C3
CHEMBL3453715	CC(C)c1c(cnn1c2ccccn2)C(=O)N3CC(C)OC(C)(C)C3
CHEMBL3453720	CCc1c(cnn1c2ccccn2)C(=O)N3CC(C)OC(C)(C)C3
CHEMBL3453877	CN(Cc1cnn(C)c1)C(=O)Nc2cccnc2n3cccn3
CHEMBL3453883	CN(CCc1ccccn1)C(=O)Nc2cccnc2n3cccn3
CHEMBL3453940	COCCN(Cc1ccccn1)C(=O)Nc2cccnc2n3cccn3
CHEMBL3454431	Oc1ccc(cc1)C2CCN(CC2)C(=O)c3ccc(nc3)n4cccn4
CHEMBL345504	C[C@@H]1CC2C3CCC4=Cc5c(CC4(C)C3C(O)CC2(C)[C@@]1(O)C(=O)CO)cnn5c6ccccn6
CHEMBL3455482	CCN(CC)CCCC(C)NC(=O)c1cccnc1n2cccn2
CHEMBL3455493	CCC(CC)NC(=O)c1cccnc1n2cccn2
CHEMBL3456341	CSCCC(NC(=O)N)C(=O)Nc1ccc(nc1)n2cccn2
CHEMBL3457162	O=C(NCCN1CCOCC1)NCc2cccnc2n3cccn3
CHEMBL3457163	O=C(CCC(=O)N1CCOCC1)NCc2cccnc2n3cccn3
CHEMBL3457547	CCOC(=O)c1cnn(c1N)c2cc(C)ccn2
CHEMBL3459281	CC(C)(C)c1cc(NC(=O)C2COCCO2)n(n1)c3ccccn3
CHEMBL3459292	CC(C)(C)c1cc(NC(=O)C2CCCO2)n(n1)c3ccccn3
CHEMBL3459344	CC(C)C(=O)Nc1cc(nn1c2ccccn2)C(C)(C)C
CHEMBL3462035	Cc1cnn(c1)c2cccc(n2)N3CCCC3
CHEMBL3462038	Cc1cnn(c1)c2cccc(n2)N3CCCCC3
CHEMBL3462062	Cc1cnn(c1)c2cccc(n2)N3CCN(CC3)c4cc(C)nc(C)n4
CHEMBL3462563	CC(C)OCCN1CCN(CC1)C(=O)c2cccc(n2)n3cccn3
CHEMBL3463741	FC(F)CN1CCC(CC1)NCc2ccc(nc2)n3cccn3
CHEMBL3465255	CC(O)(CNC(=O)c1cccnc1n2cccn2)c3occc3
CHEMBL3465264	CC(O)(CNC(=O)c1cccnc1n2cccn2)c3cccs3
CHEMBL3465266	CC(O)(CNC(=O)c1cccnc1n2cccn2)c3ccsc3
CHEMBL3465296	O=C(Nc1cccnc1n2cccn2)N3CCCC(C3)N4CCCC4
CHEMBL3466177	NS(=O)(=O)c1cnn(c1)c2ccc(NC(=O)CC3CCCC3)cn2
CHEMBL3466178	NS(=O)(=O)c1cnn(c1)c2ccc(NC(=O)C3CCCCC3)cn2
CHEMBL3466296	COc1cccc(CNCc2cccnc2n3cccn3)c1OC
CHEMBL3466352	COc1ccc(CNc2cccnc2n3cccn3)cc1OC
CHEMBL3466369	COc1cccc(CNc2cccnc2n3cccn3)c1OC
CHEMBL3466371	COc1ccc(CNc2cccnc2n3cccn3)c(OC)c1OC
CHEMBL3467439	CCNc1cc2CN(CCc2nn1)C(=O)c3ccc(nc3)n4cccn4
CHEMBL3467445	CN(C)c1cc2CN(CCc2nn1)C(=O)c3ccc(nc3)n4cccn4
CHEMBL3467448	CNc1cc2CN(CCc2nn1)C(=O)c3ccc(nc3)n4cccn4
CHEMBL3469307	O=C(N1CCN(CC2CC2)CC1)c3cccnc3n4cccn4
CHEMBL347060	O=C(N1CCC(CNCc2cccc(n2)n3cccn3)CC1)C45C[C@@H]6C[C@@H](C[C@@H](C6)C4)C5
CHEMBL3479742	CC(N)c1cnn(c1C)c2ccccn2
CHEMBL3487718	Cc1cnn(c1)C2CCCN(C2)C(=O)c3ccc(nc3)n4cccn4
CHEMBL3488452	Cc1nccn1C2CCCN(C2)C(=O)c3ccc(nc3)n4cccn4
CHEMBL3489683	CC(C)N1CC(CC1=O)C(=O)NCc2cccnc2n3cccn3
CHEMBL3489684	CN1CC(CC1=O)C(=O)NCc2ccnc(c2)n3cccn3
CHEMBL3489685	CC(C)CN1CC(CC1=O)C(=O)NCc2ccnc(c2)n3cccn3
CHEMBL3489702	CCN1CC(CC1=O)C(=O)NCc2ccnc(c2)n3cccn3
CHEMBL3489722	Cc1cnn(CC2CCCN2C(=O)c3ccc(nc3)n4cccn4)c1
CHEMBL3490143	Cc1cc(C)n(n1)c2ccc(CNCc3ccc(F)c(F)c3)cn2
CHEMBL3490144	Cc1oc(CNCc2ccc(nc2)n3nc(C)cc3C)cc1
CHEMBL3490145	Cc1cc(C)n(n1)c2ccc(CNCc3cccc(c3)C#N)cn2
CHEMBL3490146	Cc1cc(C)n(n1)c2ccc(CNCc3ccc(F)cc3F)cn2
CHEMBL3490180	COc1cc(CNCc2ccc(nc2)n3nc(C)cc3C)cc(OC)c1
CHEMBL3490409	O=C(N1CCCC(C1)n2cccn2)c3ccc(nc3)n4cccn4
CHEMBL3491484	CCC1CN(CCO1)C(=O)NCc2cccnc2n3cccn3
CHEMBL3491524	CN1CCCN(CC1)C(=O)NCc2cccnc2n3cccn3
CHEMBL3491525	CCN1CCN(CC1)C(=O)NCc2cccnc2n3cccn3
CHEMBL3491526	CCC1CCCN(C1)C(=O)NCc2cccnc2n3cccn3
CHEMBL3491529	CC(=O)NC1CCCN(C1)C(=O)Nc2cccnc2n3cccn3
CHEMBL3493272	COCCN1CC(CC1=O)C(=O)NCc2cccnc2n3cccn3
CHEMBL3493273	O=C(NCc1ccnc(c1)n2cccn2)C3CN(CC4CC4)C(=O)C3
CHEMBL3493274	CC(C)CN1CC(CC1=O)C(=O)NCc2cccnc2n3cccn3
CHEMBL3493277	CN1CC(CC1=O)C(=O)NCc2cccnc2n3cccn3
CHEMBL3493281	CCN1CC(CC1=O)C(=O)NCc2cccnc2n3cccn3
CHEMBL3494225	O=C(CCC1CCCO1)NCc2ccnc(c2)n3cccn3
CHEMBL3495054	CC(C)N1CC(CC1=O)C(=O)NCc2ccnc(c2)n3cccn3
CHEMBL3495117	COCCN1CC(CC1=O)C(=O)NCc2ccnc(c2)n3cccn3
CHEMBL3495238	COc1ccc(C)cc1CNCc2ccc(nc2)n3nc(C)cc3C
CHEMBL3495239	CC(C)Oc1ccc(CNCc2ccc(nc2)n3nc(C)cc3C)cc1
CHEMBL3495240	Cc1ccc(CNCc2ccc(nc2)n3nc(C)cc3C)cc1
CHEMBL3495424	Cc1cc2NCC(CNCc3ccc(nc3)n4cccn4)Cn2n1
CHEMBL3496006	CC(C)CN1CCN(CC1)C(=O)NCc2cccnc2n3cccn3
CHEMBL3496007	CC(=O)NC1CCCN(C1)C(=O)NCc2cccnc2n3cccn3
CHEMBL3496965	O=C(N1CCC(CC1)Nc2cccnn2)c3ccc(nc3)n4cccn4
CHEMBL3496987	O=C(N1CCCN(CC1)c2cccnn2)c3ccc(nc3)n4cccn4
CHEMBL3496994	O=C(NCc1cccnc1n2cccn2)C3CN(CC4CC4)C(=O)C3
CHEMBL350389	CCc1nn(c(CC)c1CCCCCCOc2ccc(OC)cc2Cl)c3ccccn3
CHEMBL355812	CCc1ccc(cc1)c2cc(nn2c3ccc(cn3)S(=O)(=O)C)C(F)F
CHEMBL356134	O=C(NCCNCc1cccc(n1)n2cccn2)C34C[C@@H]5C[C@@H](C[C@@H](C5)C3)C4
CHEMBL356142	Oc1ccc2c(nccc2n1)n3cccn3
CHEMBL357522	COc1ccc(cc1Cl)C(=O)N2CCC(CNCc3cccc(n3)n4cccn4)CC2
CHEMBL357773	Cc1ccc(cc1Cl)C(=O)N2CCC(CNCc3cccc(n3)n4cccn4)CC2
CHEMBL358312	Clc1ccc(cc1Cl)C(=O)N2CCCC(CNCc3cccc(n3)n4cccn4)C2
CHEMBL3586505	Cc1ccc(nc1)n2nc(cc2NC(=O)c3cnn4cccnc34)C5CCN(CC5)S(=O)(=O)C
CHEMBL3586506	CS(=O)(=O)N1CCC(CC1)c2cc(NC(=O)c3cnn4cccnc34)n(n2)c5ccc(cn5)C6CC6
CHEMBL3586509	CC(C)N1CCC(CC1)c2cc(NC(=O)c3cnn4cccnc34)n(n2)c5ccc(C)cn5
CHEMBL3586510	CN1CCN(CC1)c2cc(NC(=O)c3cnn4cccnc34)n(n2)c5ccc(C)cn5
CHEMBL3586511	Cc1ccc(nc1)n2nc(cc2NC(=O)c3cnn4cccnc34)N5CCN(CC5)S(=O)(=O)C
CHEMBL358808	Fc1cccc(c1)C(=O)N2CCC(CNCc3cccc(n3)n4cccn4)CC2
CHEMBL3588872	CCOc1nn(c(C)c1Oc2cc(Cl)cc(Cl)c2)c3ccc(cn3)C4CC4
CHEMBL3589137	COc1cc(ccc1OCC(C)(C)O)N2Cc3cn(nc3C2=O)c4ccc(Cl)cn4
CHEMBL3589201	CCOc1nn(c(C)c1Cc2ccccc2)c3ccccn3
CHEMBL3589202	CCOc1nn(c(C)c1Cc2ccccc2)c3cc(C)ccn3
CHEMBL3589203	CCOc1nn(c(C)c1Cc2ccccc2)c3ncccc3C
CHEMBL3589204	CCOc1nn(c(C)c1Cc2ccccc2)c3cccc(C)n3
CHEMBL3589205	CCOc1nn(c(C)c1Cc2ccccc2)c3ncccc3F
CHEMBL3589206	CCOc1nn(c(C)c1Cc2ccccc2)c3cccc(F)n3
CHEMBL3589207	CCOc1nn(c(C)c1Cc2ccccc2)c3ccc(cn3)C(F)(F)F
CHEMBL3589208	CCOc1nn(c(C)c1Cc2ccccc2)c3cccc(n3)C(F)(F)F
CHEMBL3589209	CCOc1nn(c(C)c1Cc2ccccc2)c3ccc(Cl)cn3
CHEMBL3589210	CCOc1nn(c(C)c1Cc2ccccc2)c3ccc(Br)cn3
CHEMBL3589211	CCOc1nn(c(C)c1Cc2ccccc2)c3ncc(Br)cc3F
CHEMBL3589212	CCOc1nn(c(C)c1Cc2ccccc2)c3ncc(Br)cc3C
CHEMBL3589213	CCOc1nn(c(C)c1Cc2ccccc2)c3ccc(cn3)C#N
CHEMBL3589214	CCOc1nn(c(C)c1Cc2ccccc2)c3ccc(cn3)C(=O)OC
CHEMBL3589215	CCOc1nn(c(C)c1Cc2ccccc2)c3ccc(cn3)C(=O)C
CHEMBL3589216	CCOc1nn(c(C)c1Cc2ccccc2)c3ccc(OC)cn3
CHEMBL3589217	CCOc1nn(c(C)c1Cc2ccccc2)c3ccc(cn3)C4CC4
CHEMBL3589750	CC(C)Oc1nn(c(C)c1Oc2c(F)cccc2F)c3ccc(C)cn3
CHEMBL3589751	CC(C)Oc1nn(c(C)c1Oc2c(F)cccc2F)c3ccc(cn3)C(F)(F)F
CHEMBL3589752	CC(C)Oc1nn(c(C)c1Oc2c(F)cccc2F)c3ncc(cc3F)C4CC4
CHEMBL3589753	CC(C)Oc1nn(c(C)c1Oc2c(F)cccc2F)c3ncc(cc3C#N)C4CC4
CHEMBL3589754	CC(C)Oc1nn(c(C)c1Oc2c(F)cccc2F)c3ccc(Br)cn3
CHEMBL3589755	CC(C)Oc1nn(c(C)c1Oc2c(F)cccc2F)c3ncc(Br)cc3F
CHEMBL3589756	CC(C)Oc1nn(c(C)c1Oc2c(F)cccc2F)c3ncc(Br)cc3C
CHEMBL3589757	COc1ccc(nc1)n2nc(OC(C)C)c(Oc3c(F)cccc3F)c2C
CHEMBL3589758	CC(C)Oc1nn(c(C)c1Oc2c(F)cccc2F)c3ccc(cn3)C(=O)C
CHEMBL3589759	CC(C)Oc1nn(c(C)c1Oc2c(F)cccc2F)c3ccc(cn3)C(C)(C)O
CHEMBL3589760	CCc1ccc(nc1)n2nc(OC(C)C)c(Oc3c(F)cccc3F)c2C
CHEMBL3589761	CCc1cnc(c(F)c1)n2nc(OC(C)C)c(Oc3c(F)cccc3F)c2C
CHEMBL3589762	CC(C)Oc1nn(c(C)c1Oc2c(F)cccc2F)c3ccc(cn3)C(C)(F)F
CHEMBL3589763	CCCc1cnc(c(F)c1)n2nc(OC(C)C)c(Oc3c(F)cccc3F)c2C
CHEMBL3589764	COc1cc(cnc1n2nc(OC(C)C)c(Oc3c(F)cccc3F)c2C)C4CC4
CHEMBL3589765	CC(C)Oc1nn(c(C)c1Oc2c(F)cccc2F)c3ncc(cc3N(C)C)C4CC4
CHEMBL3589766	CC(C)Oc1nn(c(C)c1Oc2c(F)cccc2F)c3ncc(cc3OCc4ccccc4)C5CC5
CHEMBL3589767	CC(C)Oc1nn(c(C)c1Oc2c(F)cccc2F)c3ncc(cc3O)C4CC4
CHEMBL3590032	CCOc1nn(c(C)c1Cc2ccccc2)c3ncc(cc3F)C4CC4
CHEMBL3590033	CCOc1nn(c(C)c1Cc2ccccc2)c3ncc(cc3C#N)C4CC4
CHEMBL3590034	CCOc1nn(c(C)c1Cc2ccccc2)c3ccc(cn3)C(C)(C)O
CHEMBL3590035	CCOc1nn(c(C)c1Cc2ccccc2)c3ccc(cn3)C(C)C
CHEMBL3590036	CCOc1nn(c(C)c1Oc2ccccc2)c3ccc(cn3)C4CC4
CHEMBL3590037	CCOc1nn(c(C)c1Oc2ccccc2F)c3ccc(cn3)C4CC4
CHEMBL3590038	CCOc1nn(c(C)c1Oc2ccccc2Cl)c3ccc(cn3)C4CC4
CHEMBL3590039	CCOc1nn(c(C)c1Oc2ccccc2Br)c3ccc(cn3)C4CC4
CHEMBL3590040	CCOc1nn(c(C)c1Oc2ccccc2C(F)(F)F)c3ccc(cn3)C4CC4
CHEMBL3590041	CCOc1nn(c(C)c1Oc2cccc(c2)C(F)(F)F)c3ccc(cn3)C4CC4
CHEMBL3590042	CCOc1nn(c(C)c1Oc2ccc(cc2)C(F)(F)F)c3ccc(cn3)C4CC4
CHEMBL3590043	CCOc1nn(c(C)c1Oc2cccc(Cl)c2Cl)c3ccc(cn3)C4CC4
CHEMBL3590044	CCOc1nn(c(C)c1Oc2cc(Cl)ccc2Cl)c3ccc(cn3)C4CC4
CHEMBL3590045	CC(C)Oc1nn(c(C)c1Oc2ccccc2F)c3ccc(cn3)C4CC4
CHEMBL3590046	CC(C)Oc1nn(c(C)c1Oc2cccc(F)c2)c3ccc(cn3)C4CC4
CHEMBL3590047	CC(C)Oc1nn(c(C)c1Oc2ccc(F)cc2)c3ccc(cn3)C4CC4
CHEMBL3590048	CC(C)Oc1nn(c(C)c1Oc2cccc(F)c2F)c3ccc(cn3)C4CC4
CHEMBL3590049	CC(C)Oc1nn(c(C)c1Oc2ccc(F)cc2F)c3ccc(cn3)C4CC4
CHEMBL3590050	CC(C)Oc1nn(c(C)c1Oc2cc(F)ccc2F)c3ccc(cn3)C4CC4
CHEMBL3590051	CC(C)Oc1nn(c(C)c1Oc2c(F)cccc2F)c3ccc(cn3)C4CC4
CHEMBL3590068	CC(C)Oc1nn(c(C)c1Oc2c(F)cccc2F)c3ccccn3
CHEMBL3603917	Cc1cc(cc(c1)c2ccnc(c2)n3cccn3)C#N
CHEMBL360705	COc1ccc(c(F)c1)c2cc(nn2c3ccc(cn3)S(=O)(=O)C)C(F)(F)F
CHEMBL3609105	COc1ccc2c(OCC[C@@H]3NC(=O)N(C)CCCC\C=C/[C@@H]4C[C@]4(NC3=O)C(=O)NS(=O)(=O)C5(C)CC5)cc(nc2c1C)n6ccc(n6)C(C)C
CHEMBL3609106	COc1ccc2c(OCC[C@@H]3NC(=O)N(C)CCCC\C=C/[C@@H]4C[C@]4(NC3=O)C(=O)NS(=O)(=O)C5(C)CC5)cc(nc2c1Cl)n6ccc(n6)C(C)C
CHEMBL3609110	COc1ccc2c(OCC[C@@H]3NC(=O)N(C)CCCC\C=C/[C@@H]4C[C@]4(NC3=O)C(=O)NS(=O)(=O)C5(C)CC5)cc(nc2c1C)n6ccc(n6)C(F)(F)F
CHEMBL3609111	COc1ccc2c(OCC[C@@H]3NC(=O)N(C)CCCC\C=C/[C@@H]4C[C@]4(NC3=O)C(=O)NS(=O)(=O)C5(C)CC5)cc(nc2c1Cl)n6ccc(n6)C(F)(F)F
CHEMBL3634159	COc1ccc2c(O[C@H]3C[C@@H]4N(C3)C(=O)N[C@@]5(C[C@H]5\C=C\CCCCN(C)C4=O)C(=O)NS(=O)(=O)C6(C)CC6)cc(nc2c1C)n7cc(cn7)C(C)C
CHEMBL3634160	COc1ccc2c(O[C@H]3C[C@@H]4N(C3)C(=O)N[C@@]5(C[C@H]5\C=C\CCCCN(C)C4=O)C(=O)NS(=O)(=O)C6(C)CC6)cc(nc2c1Cl)n7cc(cn7)C(F)(F)F
CHEMBL3640035	Cc1cccc(n1)n2ncc(C)c2c3cc4cnccc4s3
CHEMBL3642177	Cc1ccc(Nc2cncnc2)c(n1)C(=O)Nc3ccn(n3)c4ccccn4
CHEMBL3644765	O=C(Nc1cnn(c1)c2ccccn2)c3nc(ccc3Nc4cncnc4)C5CC5
CHEMBL3646723	COc1cc2ncc3c(c(nn3C)c4ccc(cc4)C#N)c2cc1OCc5ccc(nc5)n6cccn6
CHEMBL3648133	OC(=O)CCNC(=O)c1ccc(cc1)C(Nc2ccc(nc2)n3cc(cn3)C(F)(F)F)C4CCCCC4
CHEMBL3648134	CC(C)CC(Nc1cnc(c(C)c1)n2cc(cn2)C(F)(F)F)c3ccc(cc3)C(=O)NCCC(=O)O
CHEMBL3648135	OC(=O)CCNC(=O)c1ccc(cc1)C(Nc2ccc(nc2)n3cc(cn3)C(F)(F)F)C4CCC4
CHEMBL3648136	OC(=O)CCNC(=O)c1ccc(cc1)C(CC2CC2)Nc3ccc(nc3)n4cc(cn4)C(F)(F)F
CHEMBL3648137	CCCC(Nc1ccc(nc1)n2cc(cn2)C(F)(F)F)c3ccc(cc3F)C(=O)NCCC(=O)O
CHEMBL3648138	CCCC(Nc1ccc(nc1)n2cc(cn2)C(F)(F)F)c3ccc(cc3C)C(=O)NCCC(=O)O
CHEMBL3648139	CC1(C)CC(C1)C(Nc2ccc(nc2)n3cc(cn3)C(F)(F)F)c4ccc(cc4)C(=O)NCCC(=O)O
CHEMBL3648154	CCCC(Nc1ccc(nc1)n2cc(cn2)c3ccccc3)c4ccc(cn4)C(=O)NCCC(=O)O
CHEMBL3648155	CCCC(Oc1ccc(nc1)n2cc(cn2)c3ccccc3)c4ccc(cc4)C(=O)NCCC(=O)O
CHEMBL3648162	CCCC(Oc1cnc(c(C)c1)n2cc(cn2)C(F)(F)F)c3ccc(cc3)C(=O)NCCC(=O)O
CHEMBL3648167	CCCC(Nc1ccc(nc1)n2cc(cn2)c3ccccc3)c4ccc(cc4)C(=O)NCCC(=O)O
CHEMBL3648168	Cc1nn(cc1Cl)c2ccc(NC(C3CCCC3)c4ccc(cc4)C(=O)NCCC(=O)O)cn2
CHEMBL3648169	CCCC(Nc1ccc(nc1)n2cc(cn2)c3ccccn3)c4ccc(cc4)C(=O)NCCC(=O)O
CHEMBL3648170	CCCC(Nc1ccc(nc1)n2cc(cn2)c3ccccc3)c4ccc(cc4)C(=O)N(C)CCC(=O)O
CHEMBL3648174	CCCC(Nc1ccc(nc1)n2cc(cn2)C3CC3)c4ccc(cc4)C(=O)NCCC(=O)O
CHEMBL3648175	OC(=O)CCNC(=O)c1ccc(cc1)C(Nc2ccc(nc2)n3cc(cn3)C(F)(F)F)C4CCOCC4
CHEMBL3648182	CCCC(Nc1ccc(cn1)C(=O)NCCC(=O)O)c2ccc(nc2)n3cc(cn3)C(F)(F)F
CHEMBL3648187	CCC[C@@H](Nc1ccc(nc1)n2cc(cn2)C(C)(C)C)c3ccc(cc3)C(=O)NCCC(=O)O
CHEMBL3648188	CCC[C@H](Nc1ccc(nc1)n2cc(cn2)C(C)(C)C)c3ccc(cc3)C(=O)NCCC(=O)O
CHEMBL3648189	CC(C)C[C@@H](Nc1ccc(nc1)n2cc(cn2)C(F)(F)F)c3ccc(cn3)C(=O)NCCC(=O)O
CHEMBL3648190	CC(C)C[C@H](Nc1ccc(nc1)n2cc(cn2)C(F)(F)F)c3ccc(cn3)C(=O)NCCC(=O)O
CHEMBL3648191	OC(=O)CCNC(=O)c1ccc(cc1)[C@@H](Nc2ccc(nc2)n3cc(cn3)C(F)(F)F)C4CCCCC4
CHEMBL3648192	OC(=O)CCNC(=O)c1ccc(cc1)[C@H](Nc2ccc(nc2)n3cc(cn3)C(F)(F)F)C4CCCCC4
CHEMBL3648200	C[C@]1(COc2ccc(Cl)cn2)CN(C[C@@H]1c3ccc(Cl)cc3)C(=O)c4ccc(nc4)n5cccn5
CHEMBL3654429	N[C@H]1C[C@H](CCO[C@@H]1c2cc(F)ccc2F)N3Cc4cnn(c4C3)c5ccc(cn5)C(F)(F)F
CHEMBL3656586	COc1cccc(Nc2ncc3CCc4nn(c5ccccn5)c(C(C)C)c4c3n2)c1
CHEMBL3656589	COc1ccc(Nc2ncc3CCc4nn(c5ccccn5)c(C(C)C)c4c3n2)cc1
CHEMBL3657551	Cc1nn(cc1CN2CC[C@@H](O)C2)c3cccc(Nc4ccc5c(c4)c(cn5C)C(=O)C(F)(F)F)n3
CHEMBL3663710	Clc1ccc(nc1)n2ccc(n2)C(=O)Nc3ccc(cc3)[C@H]4CNCCO4
CHEMBL3663711	FC(F)(F)c1ccc(nc1)n2ccc(n2)C(=O)Nc3ccc(cc3)[C@H]4CNCCO4
CHEMBL3663713	FC(F)(F)c1ccc(nc1)n2ccc(n2)C(=O)Nc3ccc(cc3)[C@@H]4CNCCO4
CHEMBL366517	COc1ccc(cc1Cl)c2cc(nn2c3ccc(cn3)S(=O)(=O)C)C(F)F
CHEMBL366677	Cc1c(c2ccccc2)n(nc1C(F)(F)F)c3ccc(cn3)S(=O)(=O)C
CHEMBL3666841	Fc1cccc(F)c1C(=O)Nc2ccc(nc2)n3nc(cc3C4CC4)C5CC5
CHEMBL3666870	Cc1nnsc1C(=O)Nc2ccc(nc2)n3nc(cc3C4CC4)C(F)(F)F
CHEMBL3666871	Cc1ccccc1C(=O)Nc2ccc(nc2)n3nc(cc3C4CC4)C(F)(F)F
CHEMBL3666872	Fc1ccccc1C(=O)Nc2ccc(nc2)n3nc(cc3C4CC4)C(F)(F)F
CHEMBL3666873	Fc1cccc(C(=O)Nc2ccc(nc2)n3nc(cc3C4CC4)C(F)(F)F)c1F
CHEMBL3666874	Fc1cccc(F)c1C(=O)Nc2ccc(nc2)n3nc(cc3C4CC4)C(F)(F)F
CHEMBL3666875	FC(F)(F)c1cc(C2CC2)n(n1)c3ccc(NC(=O)c4cccnc4)cn3
CHEMBL3666876	FC(F)(F)c1cc(C2CC2)n(n1)c3ccc(NC(=O)c4ccncc4)cn3
CHEMBL3666877	Fc1cnccc1C(=O)Nc2ccc(nc2)n3nc(cc3C4CC4)C(F)(F)F
CHEMBL3666878	Fc1cccc(F)c1NC(=O)c2ccc(nc2)n3nc(cc3C4CC4)C(F)(F)F
CHEMBL366726	CSc1ccc(cc1)c2cc(nn2c3ccc(cn3)S(=O)(=O)C)C(F)F
CHEMBL3669481	O=C1N(Cc2ccnc(c2)n3cccn3)CCCC14CCN(CC4)c5cnc6ccccc6n5
CHEMBL3669498	O=C1N(Cc2cccc(n2)n3cccn3)CCCC14CCN(CC4)c5cnc6ccccc6n5
CHEMBL366992	CS(=O)(=O)c1ccc(nc1)n2nc(cc2c3ccc(F)cc3)C(F)(F)F
CHEMBL367123	CSc1ccc(cc1)c2cc(nn2c3ccc(cn3)S(=O)(=O)C)C(F)(F)F
CHEMBL367179	COc1ccc(cc1C)c2cc(nn2c3ccc(cn3)S(=O)(=O)C)C(F)F
CHEMBL367550	Cc1c(nn(c2ccc(cn2)S(=O)(=O)C)c1c3ccccc3)C(F)F
CHEMBL367617	COc1ccc(c(F)c1)c2cc(nn2c3ccc(cn3)S(=O)(=O)C)C(F)F
CHEMBL367785	Cc1ccc(cc1)c2cc(nn2c3ccc(cn3)S(=O)(=O)C)C(F)F
CHEMBL3678522	O=C(N1CCOCC1)c2nn(c3ccccn3)c4c2CS(=O)(=O)c5ccccc45
CHEMBL368173	COc1ccc(cc1F)c2cc(nn2c3ccc(cn3)S(=O)(=O)C)C(F)(F)F
CHEMBL3685499	CN(C)C(=O)c1nn(cc1NC(=O)c2nc(ccc2Nc3cncnc3)C4CC4)c5ccccn5
CHEMBL368724	COc1ccc(cc1Cl)c2c(Cl)c(nn2c3ccc(cn3)S(=O)(=O)C)C(F)F
CHEMBL3689061	CC(C(=O)NCc1cc(nn1c2ccccn2)C(C)(C)C)c3ccc(CNS(=O)(=O)C)c(F)c3
CHEMBL369315	CS(=O)(=O)c1ccc(nc1)n2nc(c(Cl)c2c3ccccc3)C(F)(F)F
CHEMBL3694461	C1CCC(CC1)c2cccnc2Oc3ccc4c(cnn4c5ccccn5)c3
CHEMBL3704648	Cc1cccc(n1)n2nccc2c3cc4cnccc4s3
CHEMBL3704649	Cc1cccc(n1)n2nc(C)cc2c3cc4cnccc4s3
CHEMBL3704650	CCc1cc(c2cc3cnccc3s2)n(n1)c4cccc(C)n4
CHEMBL3704651	CCc1cnn(c2cccc(C)n2)c1c3cc4cnccc4s3
CHEMBL3704652	Cc1cccc(n1)n2nc3CCCc3c2c4cc5cnccc5s4
CHEMBL3704653	Cc1cccc(n1)n2nc(C)c(C)c2c3cc4cnccc4s3
CHEMBL3704654	Cc1cccc(n1)n2ncc(C)c2c3cc4ccncc4s3
CHEMBL3704655	Cc1cccc(n1)n2nc3CCCc3c2c4cc5ccncc5s4
CHEMBL370579	CC1CCCN(C1)c2c(C#N)c(nn2c3ccc(cn3)S(=O)(=O)C)C(F)F
CHEMBL372393	CC(C)(C)CNc1c(C#N)c(nn1c2ccc(cn2)S(=O)(=O)N)C(F)F
CHEMBL3727830	CCN(CC)CCNC(=O)c1c(C)[nH]c(\C=C\2/C(=O)Nc3ccc(cc23)c4ccnn4c5ccccn5)c1C
CHEMBL3728142	CN1CCN(CC1)C(=O)c2c(C)[nH]c(\C=C\3/C(=O)Nc4ccc(cc34)c5cnn(c5)c6ccccn6)c2C
CHEMBL3731881	Cc1[nH]c(\C=C\2/C(=O)Nc3ccc(cc23)c4cnn(c4)c5ccccn5)c(C)c1C(=O)N6CCOCC6
CHEMBL3732142	Cc1[nH]c(\C=C\2/C(=O)Nc3ccc(cc23)c4cnn(c4)c5ccccn5)c(C)c1C(=O)NCCN6CCCC6
CHEMBL3732247	CCN(CC)CCNC(=O)c1c(C)[nH]c(\C=C\2/C(=O)Nc3ccc(cc23)c4cnn(c4)c5ccccn5)c1C
CHEMBL374147	COc1cc(COCc2ccc(nc2)n3cc(cn3)C(=O)O)cc(OC)c1
CHEMBL3746003	COc1cnc(c2[nH]cc(C(=O)C(=O)N3CCc4c(C3)cccc4c5ccccn5)c12)n6ccc(CO)n6
CHEMBL3746625	COc1cnc(c2[nH]cc(C(=O)C(=O)N3CCc4c(C3)cccc4c5ccccn5)c12)n6ccc(n6)C(F)(F)F
CHEMBL375008	OC(=O)c1cnn(c1)c2ccc(COCc3ccccc3Cl)cn2
CHEMBL377284	CS(=O)(=O)c1ccc(nc1)n2nc(cc2c3ccc(cc3)c4cscn4)C(F)(F)F
CHEMBL3774392	O=C1NC=Nc2c1ccnc2n3cc(CCN4CCC(Cc5ccccc5)CC4)cn3
CHEMBL3774456	Fc1cc(F)cc(c1)C2CCN(CCc3cnn(c3)c4nccc5C(=O)NC=Nc45)CC2
CHEMBL3774457	O=C1NC=Nc2c1ccnc2n3cc(CCN4CCC(CC4)c5ccccc5)cn3
CHEMBL3774537	Clc1cccc(c1)C2CCN(CCc3cnn(c3)c4nccc5C(=O)NC=Nc45)CC2
CHEMBL3774665	CS(=O)(=O)c1ccc(cc1)C2CCN(CCc3cnn(c3)c4nccc5C(=O)NC=Nc45)CC2
CHEMBL3774672	OCCc1cnn(c1)c2nccc3C(=O)NC=Nc23
CHEMBL3774701	CN(CCc1cnn(c1)c2nccc3C(=O)NC=Nc23)Cc4ccc(cc4)S(=O)(=O)C
CHEMBL3774710	O=C1NC=Nc2c1ccnc2n3cc(CCN4CCCC4)cn3
CHEMBL3774747	CN(CCc1cnn(c1)c2nccc3C(=O)NC=Nc23)Cc4ccc(F)cc4
CHEMBL3774749	O=C1NC=Nc2c1ccnc2n3cccn3
CHEMBL3774922	CN(CCCc1cnn(c1)c2nccc3C(=O)NC=Nc23)Cc4ccc(cc4)C#N
CHEMBL3774940	Clc1ccc(CC2CCN(CCc3cnn(c3)c4nccc5C(=O)NC=Nc45)CC2)cc1Cl
CHEMBL377499	CS(=O)(=O)c1ccc(nc1)n2nc(c(C#N)c2OCC3CCC(=C)CC3)C(F)(F)F
CHEMBL3775040	Fc1ccc(CC2CCN(CCc3cnn(c3)c4nccc5C(=O)NC=Nc45)CC2)cc1
CHEMBL3775121	Fc1ccc(C2CCN(CCc3cnn(c3)c4nccc5C(=O)NC=Nc45)CC2)c(F)c1
CHEMBL3775130	O=C1NC=Nc2c1ccnc2n3cc(CCN4CCC(Cc5noc(n5)C6CC6)CC4)cn3
CHEMBL3775135	CN(CCc1cnn(c1)c2nccc3C(=O)NC=Nc23)Cc4ccc(cc4)C#N
CHEMBL3775145	CN(CCc1cnn(c1)c2nccc3C(=O)NC=Nc23)Cc4ccc(Cl)c(Cl)c4
CHEMBL3775277	O=C1NC=Nc2c1ccnc2n3cc(CCN4CCC(CC4)c5ccncc5)cn3
CHEMBL3775451	O=C1NC=Nc2c1ccnc2n3cc(CCN4CCC(Cc5ccc6OCOc6c5)CC4)cn3
CHEMBL3775454	CN(C)CCc1cnn(c1)c2nccc3C(=O)NC=Nc23
CHEMBL3775465	COc1cccc(CC2CCN(CCc3cnn(c3)c4nccc5C(=O)NC=Nc45)CC2)c1
CHEMBL3775500	O=C1NC=Nc2c1ccnc2n3cc(CCN4CCCCC4)cn3
CHEMBL3775516	FC(F)(F)c1ccc(CC2CCN(CCc3cnn(c3)c4nccc5C(=O)NC=Nc45)CC2)cc1
CHEMBL3775545	COc1ccc(cc1)C2CCN(CCc3cnn(c3)c4nccc5C(=O)NC=Nc45)CC2
CHEMBL3775548	FC(F)(F)c1cccc(c1)C2CCN(CCc3cnn(c3)c4nccc5C(=O)NC=Nc45)CC2
CHEMBL3775668	O=C1NC=Nc2c1ccnc2n3cc(CCN4CCC(CC4)c5cccs5)cn3
CHEMBL3775814	O=C1NC=Nc2c1ccnc2n3cc(CCN4CCC(CC4)c5ccc(cc5)C#N)cn3
CHEMBL3775823	Clc1ccccc1C2CCN(CCc3cnn(c3)c4nccc5C(=O)NC=Nc45)CC2
CHEMBL3775894	Clc1cc(Cl)cc(c1)C2CCN(CCc3cnn(c3)c4nccc5C(=O)NC=Nc45)CC2
CHEMBL3775899	Clc1ccc(CC2CCN(CCc3cnn(c3)c4nccc5C(=O)NC=Nc45)CC2)cc1
CHEMBL3775953	Fc1ccc(cc1)C2CCN(CCc3cnn(c3)c4nccc5C(=O)NC=Nc45)CC2
CHEMBL3775956	O=C1NC=Nc2c1ccnc2n3cc(CCN4CCC(Cc5cccnc5)CC4)cn3
CHEMBL3775977	Clc1ccc(cc1)C2CCN(CCc3cnn(c3)c4nccc5C(=O)NC=Nc45)CC2
CHEMBL377674	CS(=O)(=O)c1ccc(nc1)n2nc(cc2c3cccc(c3)c4cscn4)C(F)(F)F
CHEMBL377797	CS(=O)(=O)c1ccc(nc1)n2nc(cc2c3ccc(c(Cl)c3)c4cscn4)C(F)(F)F
CHEMBL377927	CS(=O)(=O)c1ccc(nc1)n2nc(cc2OCC3CC3)C(F)(F)F
CHEMBL3780349	COc1ccccc1N2CCN(CC2)c3ncnc4c3cnn4c5ccccn5
CHEMBL3781535	COc1ccccc1N2CCN(CC2)c3ncnc4c3cnn4c5ncccc5F
CHEMBL3782020	Cc1ccncc1c2cccc3c2cnn3c4ccccn4
CHEMBL3785832	OC(=O)c1ccnc(c1)n2nccc2OCc3ccc(Cl)cc3
CHEMBL3786038	CCC1=C(C)Nc2c(cnn2C1=O)c3cnn(c3)c4cc(CO)ccn4
CHEMBL378649	Cc1cc(ccc1c2occc2)c3cc(nn3c4ccc(cn4)S(=O)(=O)C)C(F)(F)F
CHEMBL3786579	OCCc1cnn(c1OCc2ccc(F)cc2)c3cc(ccn3)C(=O)O
CHEMBL3786952	Cc1cc(Cl)ccc1COc2ccnn2c3cc(ccn3)C(=O)O
CHEMBL3786987	COC(=O)c1ccnc(c1)n2nccc2OCc3ccc(Cl)cc3
CHEMBL378875	CS(=O)(=O)c1ccc(nc1)n2nc(cc2c3ccc(c(F)c3)c4occc4)C(F)(F)F
CHEMBL380148	CS(=O)(=O)c1ccc(nc1)n2nc(cc2c3ccc(c(Cl)c3)c4occc4)C(F)F
CHEMBL380329	CS(=O)(=O)c1ccc(nc1)n2nc(c(C#N)c2SC3CCCCC3)C(F)(F)F
CHEMBL380457	Cc1cc(ccc1c2cscn2)c3cc(nn3c4ccc(cn4)S(=O)(=O)C)C(F)F
CHEMBL3805825	NC(=O)c1cncc(OCc2cccc(NC(=O)c3ccc(nc3)n4cccn4)c2)c1
CHEMBL380595	Cc1ccc(CNc2c(C#N)c(nn2c3ccc(cn3)S(=O)(=O)C)C(F)(F)F)cc1
CHEMBL380731	CS(=O)(=O)c1ccc(nc1)n2nc(cc2OCc3ccccc3)C(F)(F)F
CHEMBL3808574	Clc1cccnc1n2nc(Br)cc2c3nc4cccc(C(=O)Nc5ccccc5Br)c4[nH]3
CHEMBL3808588	FC(F)(F)c1ccc(NC(=O)c2cccc3nc([nH]c23)c4cc(Br)nn4c5ncccc5Cl)cc1
CHEMBL3808600	COc1ccccc1NC(=O)c2cccc3nc([nH]c23)c4cc(Br)nn4c5ncccc5Cl
CHEMBL3808654	CCCNC(=O)c1cccc2oc(nc12)c3cc(Br)nn3c4ncccc4Cl
CHEMBL3808870	Clc1ccc(CNC(=O)c2cccc3nc([nH]c23)c4cc(Br)nn4c5ncccc5Cl)cc1
CHEMBL3809068	Clc1cccnc1n2nc(Br)cc2c3nc4cccc(C(=O)Nc5ccccc5)c4[nH]3
CHEMBL3809113	Clc1cccnc1n2nc(Br)cc2c3nc4cccc(C(=O)NCc5ccccn5)c4[nH]3
CHEMBL3809200	Fc1ccc(NC(=O)c2cccc3nc([nH]c23)c4cc(Br)nn4c5ncccc5Cl)c(F)c1
CHEMBL3809232	FC(F)(F)c1ccc(CNC(=O)c2cccc3nc([nH]c23)c4cc(Br)nn4c5ncccc5Cl)cc1
CHEMBL3809263	CCCNC(=O)c1cccc2nc(oc12)c3cc(Br)nn3c4ncccc4Cl
CHEMBL3809349	Fc1ccccc1NC(=O)c2cccc3nc([nH]c23)c4cc(Br)nn4c5ncccc5Cl
CHEMBL3809386	COc1cccc(OC)c1NC(=O)c2cccc3nc([nH]c23)c4cc(Br)nn4c5ncccc5Cl
CHEMBL3809398	Cc1cccc(NC(=O)c2cccc3nc([nH]c23)c4cc(Br)nn4c5ncccc5Cl)c1
CHEMBL3809450	Clc1cccnc1n2nc(Br)cc2c3nc4cccc(C(=O)Nc5ccccc5I)c4[nH]3
CHEMBL3809497	COc1cccc(C)c1NC(=O)c2cccc3nc([nH]c23)c4cc(Br)nn4c5ncccc5Cl
CHEMBL3809545	CNC(=O)c1cccc2nc([nH]c12)c3cc(Br)nn3c4ncccc4Cl
CHEMBL3809712	COc1ccc(cc1NC(=O)c2cccc3nc([nH]c23)c4cc(Br)nn4c5ncccc5Cl)C(F)(F)F
CHEMBL3809830	Clc1cccnc1n2nc(Br)cc2c3nc4cccc(C(=O)NCc5ccccc5)c4[nH]3
CHEMBL3809871	COc1cccc(F)c1NC(=O)c2cccc3nc([nH]c23)c4cc(Br)nn4c5ncccc5Cl
CHEMBL3809885	Cc1ccc(CNC(=O)c2cccc3nc([nH]c23)c4cc(Br)nn4c5ncccc5Cl)cc1
CHEMBL3809964	COc1ccc(NC(=O)c2cccc3nc([nH]c23)c4cc(Br)nn4c5ncccc5Cl)cc1
CHEMBL3809992	COc1ccc(NC(=O)c2cccc3nc([nH]c23)c4cc(Br)nn4c5ncccc5Cl)c(OC)c1
CHEMBL3810006	CCCNC(=O)c1cccc2nc([nH]c12)c3cc(Br)nn3c4ncccc4Cl
CHEMBL3810090	Cc1ccc(NC(=O)c2cccc3nc([nH]c23)c4cc(Br)nn4c5ncccc5Cl)c(C)c1
CHEMBL3810206	Fc1ccc(F)c(CNC(=O)c2cccc3nc([nH]c23)c4cc(Br)nn4c5ncccc5Cl)c1F
CHEMBL3810219	CCNC(=O)c1cccc2nc([nH]c12)c3cc(Br)nn3c4ncccc4Cl
CHEMBL3810329	Fc1ccc(NC(=O)c2cccc3nc([nH]c23)c4cc(Br)nn4c5ncccc5Cl)c(F)c1F
CHEMBL381142	CS(=O)(=O)c1ccc(nc1)n2nc(cc2OCc3ccncc3)C(F)(F)F
CHEMBL381158	CS(=O)(=O)c1ccc(nc1)n2nc(c(C#N)c2Sc3ccccc3)C(F)(F)F
CHEMBL381251	CCC(C)CNc1c(C#N)c(nn1c2ccc(cn2)S(=O)(=O)N)C(F)(F)F
CHEMBL381304	CS(=O)(=O)c1ccc(nc1)n2nc(c(C#N)c2OC3CCCCCC3)C(F)(F)F
CHEMBL381363	CC1CCC(C1)Oc2c(C#N)c(nn2c3ccc(cn3)S(=O)(=O)C)C(F)(F)F
CHEMBL381716	CS(=O)(=O)c1ccc(nc1)n2nc(c(C#N)c2OCC3CCCC3)C(F)(F)F
CHEMBL381834	Cc1cc(ccc1c2cocn2)c3cc(nn3c4ccc(cn4)S(=O)(=O)C)C(F)(F)F
CHEMBL381879	CC(C)(C)CNc1c(C#N)c(nn1c2ccc(cn2)S(=O)(=O)C)C(F)(F)F
CHEMBL381971	CCCSc1c(C#N)c(nn1c2ccc(cn2)S(=O)(=O)C)C(F)(F)F
CHEMBL382013	CC(C)COc1cc(nn1c2ccc(cn2)S(=O)(=O)C)C(F)(F)F
CHEMBL382095	CCC(CC)Nc1c(C#N)c(nn1c2ccc(cn2)S(=O)(=O)C)C(F)(F)F
CHEMBL3822825	C[C@@H](c1ccc2NC(=O)Sc2c1)c3ccn(n3)c4ccccn4
CHEMBL3823222	CC(c1ccc2NC(=O)Sc2c1)c3ccn(n3)c4ccccn4
CHEMBL3823247	C[C@H](c1ccc2NC(=O)Sc2c1)c3ccn(n3)c4ccccn4
CHEMBL3823351	C[C@@H](c1ccc2NC(=O)Sc2c1)c3ccn(n3)c4ccc(CCO)cn4
CHEMBL3823394	C[C@@H](c1ccc2NC(=O)Sc2c1)c3ccn(n3)c4ccc(OCCO)cn4
CHEMBL3823445	C[C@@H](c1ccc2NC(=O)Sc2c1)c3ccn(n3)c4ccc(F)cn4
CHEMBL3823817	C[C@@H](c1ccc2NC(=O)Sc2c1)c3ccn(n3)c4ccc(CCC(C)(C)O)cn4
CHEMBL3823956	CN(c1ccc2[nH]ncc2c1)c3ccn(n3)c4ccccn4
CHEMBL3824102	C[C@H](c1ccc2NC(=O)Sc2c1)c3ccn(n3)c4ccc(OCCO)cn4
CHEMBL3824269	C[C@H](c1ccc2NC(=O)Sc2c1)c3ccn(n3)c4ccc(CCO)cn4
CHEMBL382479	CS(=O)(=O)c1ccc(nc1)n2nc(cc2OCc3cccc4ccccc34)C(F)(F)F
CHEMBL382484	CS(=O)(=O)c1ccc(nc1)n2nc(c(C#N)c2OC3CCCC3)C(F)(F)F
CHEMBL382524	CC1CCCCC1Nc2c(C#N)c(nn2c3ccc(cn3)S(=O)(=O)C)C(F)(F)F
CHEMBL382829	CC(C)COc1c(C)c(nn1c2ccc(cn2)S(=O)(=O)C)C(F)(F)F
CHEMBL3828444	Oc1cc(nn1c2ccccn2)c3ccccc3
CHEMBL383064	CS(=O)(=O)c1ccc(nc1)n2nc(cc2c3ccc(c(Cl)c3)c4occc4)C(F)(F)F
CHEMBL383103	CCC(COC)Oc1c(C#N)c(nn1c2ccc(cn2)S(=O)(=O)C)C(F)(F)F
CHEMBL383151	C[C@@H]1CN(C[C@H](C)O1)c2c(C#N)c(nn2c3ccc(cn3)S(=O)(=O)N)C(F)(F)F
CHEMBL383154	CC(C)Oc1cc(nn1c2ccc(cn2)S(=O)(=O)C)C(F)(F)F
CHEMBL383207	CC(C)COc1c(C#N)c(nn1c2ccc(cn2)S(=O)(=O)C)C(F)(F)F
CHEMBL383210	CS(=O)(=O)c1ccc(nc1)n2nc(cc2c3ccc(cc3)c4nccs4)C(F)(F)F
CHEMBL383272	Cc1cc(ccc1c2cscn2)c3cc(nn3c4ccc(cn4)S(=O)(=O)C)C(F)(F)F
CHEMBL383409	CS(=O)(=O)c1ccc(nc1)n2nc(cc2c3ccc(c(F)c3)c4occc4)C(F)F
CHEMBL383470	COC(=O)c1cc(ccc1c2occc2)c3cc(nn3c4ccc(cn4)S(=O)(=O)C)C(F)(F)F
CHEMBL386421	OC(=O)c1cnn(c1)c2ccc(COCc3cccc(c3)C(F)(F)F)cn2
CHEMBL3890086	Cc1ccc(nc1)n2nc(cc2NC(=O)c3cnn4cc(NC=O)cnc34)C5CCN(CC5)S(=O)(=O)C
CHEMBL3890485	CC(C)(O)CCNC(=O)c1cnc(cc1NC2COC2)n3ncc4cc(cnc34)C#N
CHEMBL3890745	C[C@H]1CN(CCN1)c2cccc(n2)n3ncc4cnc(cc34)c5cncc(c5)C6COC6
CHEMBL3890756	CC(C)Nc1cc(ncc1C(=O)NCCc2ccc(cc2)S(=O)(=O)N)n3ncc4cc(cnc34)C#N
CHEMBL3890953	C#Cc1cncc(n1)c2cc3c(cn2)cnn3c4cccc(n4)N5CCNCC5
CHEMBL3891037	CC(C)(O)[C@H](F)CNC(=O)c1cnc(cc1N[C@H]2CCN(C2)c3ncc(F)cn3)n4ncc5cc(cnc45)C#N
CHEMBL3891376	Nc1nc2c(cnn2c3cc(NC4COC4)c(cn3)C(=O)NCCC5CC5)cc1C#N
CHEMBL3891387	CCNc1cncc(n1)c2cc3c(cn2)cnn3c4cccc(n4)N5CCNCC5
CHEMBL3891636	CC(C)Nc1cc(ncc1C(=O)NCCC(C)(C)NS(=O)(=O)C)n2ncc3cc(cnc23)C#N
CHEMBL3891851	Cc1cncc(n1)c2cc3c(cn2)cnn3c4ccc(Cl)c(n4)N5CCC[C@H](N)C5
CHEMBL3892308	Cc1cncc(n1)c2cc3c(cn2)cnn3c4cccc(n4)N5CCCNC5=O
CHEMBL3892469	CC(C)Nc1cc(ncc1C(=O)NC2(C)CC2)n3ncc4cc(C#N)c(N)nc34
CHEMBL3892509	Cn1cc(cn1)c2cc3c(cn2)cnn3c4cccc(n4)N5CCCNCC5
CHEMBL3892536	Cn1cc(cn1)c2cc3c(cn2)cnn3c4cccc(n4)N5CCNCC5
CHEMBL3892590	CCn1cc(cn1)c2cc3c(cn2)cnn3c4cccc(n4)N5CCC(O)CC5
CHEMBL3892885	Cc1cncc(n1)c2cc3c(cn2)cnn3c4ccc(CO)c(n4)N5CCC[C@H](N)C5
CHEMBL3893544	CC(C)Nc1cc(ncc1C(=O)NC2CCC=C2)n3ncc4cc(C#N)c(N)nc34
CHEMBL3893598	COc1ccc(nc1N2CCNCC(O)C2)n3ncc4cnc(cc34)c5cncc(C)n5
CHEMBL3894101	CC(C)Nc1cc(ncc1C(=O)NC2CCc3nc(N)sc3C2)n4ncc5cc(cnc45)C#N
CHEMBL3894117	CN1Cc2cnc3ccc(nc3c2N(C1=O)c4cccc(c4)C(F)(F)F)c5ccc(nc5)n6cccn6
CHEMBL3894173	CCCCNC(=O)c1cnc(cc1N[C@@H](C)CO)n2ncc3cc(cnc23)C#N
CHEMBL3894314	CC(C)Nc1cc(ncc1C(=O)NCC2CCS(=O)(=O)C2)n3ncc4cc(cnc34)C#N
CHEMBL3894394	CCCN1CCC(CC1)c2cc(NC(=O)c3cnn4cccnc34)n(n2)c5ccc(C)cn5
CHEMBL3894635	CNC(=O)[C@@H]1CC[C@H](CC1)NC(=O)c2cnc(cc2NC3CC3)n4ncc5cc(cnc45)C#N
CHEMBL3895094	Cc1cncc(n1)c2cc3c(cn2)cnn3c4cccc(n4)C5CNCCC5O
CHEMBL3895439	CN1C(=N)N[C@@](C)(CS1(=O)=O)c2sc3c(nccc3c2Cl)c4ccc(nc4)n5cccn5
CHEMBL3895531	CC1CCN(CCN1)c2cccc(n2)n3ncc4cnc(cc34)c5cncc(C)n5
CHEMBL3895603	CC[C@H](C)Nc1cc(ncc1C(=O)NC[C@@H](F)C(C)(C)O)n2ncc3cc(Cl)c(N)nc23
CHEMBL3895880	CC(C)Nc1cc(ncc1C(=O)Nc2ccc(nc2)N3CCNCC3)n4ncc5cc(cnc45)C#N
CHEMBL3896312	CCc1cncc(n1)c2cc3c(cn2)cnn3c4cccc(n4)N5CCC[C@H](N)C5
CHEMBL3896560	Cc1ccc(c(c1)C(=O)N2CCOC2Cc3ccn(n3)c4ccc(F)cn4)n5nccn5
CHEMBL3896654	CC[C@@H](CO)Nc1cc(ncc1C(=O)NC[C@@H](F)C(C)(C)O)n2ncc3cc(Cl)cnc23
CHEMBL3897707	CO[C@H](F)CNC(=O)c1cnc(cc1NC(C)C)n2ncc3cc(ccc23)C#N
CHEMBL3898528	Cc1ccc(nc1)n2nc(cc2NC(=O)c3cnn4cccnc34)N5CCNCC5
CHEMBL3898909	CC(C)Nc1cc(ncc1C(=O)NCc2onc(Cc3ccccc3)n2)n4ncc5cc(cnc45)C#N
CHEMBL3898989	Cc1cncc(n1)c2cc3c(cn2)cnn3c4ccc(C#N)c(n4)N5CCC[C@H](N)C5
CHEMBL3898994	CC(C)Nc1cc(ncc1C(=O)NCCC(=O)N2CCN(C)CC2)n3ncc4cc(cnc34)C#N
CHEMBL3899414	Cc1ccc(nc1)n2nc(cc2NC(=O)c3cnn4cccnc34)C5CCN(CC5)S(=O)(=O)C6CC6
CHEMBL3899519	FC(F)(F)Cn1cc(cn1)c2cc3c(cn2)cnn3c4cccc(n4)N5CC6(CNC6)C5
CHEMBL3899809	Cc1ccc(nc1)n2nc(cc2NC(=O)c3cnn4cccnc34)C5CCN(CC5)C6Cc7ccccc7C6
CHEMBL3899909	CS(=O)(=O)N1CCC(CC1)c2cc(NC(=O)c3cnn4cccnc34)n(n2)c5ccc(CN)cn5
CHEMBL3900258	Cc1cncc(n1)c2cc3c(cn2)cnn3c4cccc(NC5CCNCC5)n4
CHEMBL3900423	O=C1NC(=CN=C1)c2cc3c(cn2)cnn3c4cccc(n4)N5CCNCC5
CHEMBL3900425	FC1CCNCC1c2cccc(n2)n3ncc4cnc(cc34)c5cnn(CC(F)(F)F)c5
CHEMBL3900637	O=C(Nc1ccc(cc1)C2CCNC2)c3ccc(nc3)n4cccn4
CHEMBL3900682	CNC(=O)[C@@H]1CC[C@H](CC1)NC(=O)c2cnc(cc2NC(C)C)n3ncc4cc(cnc34)C#N
CHEMBL3900741	CC(C)Nc1cc(ncc1C(=O)Nc2ccc(cn2)C(C)(C)O)n3ncc4cc(cnc34)C#N
CHEMBL3900796	Cc1cncc(n1)c2cc3c(cn2)cnn3c4cccc(n4)N5CCCN(CC5)C6COC6
CHEMBL3900811	CC(C)Nc1cc(ncc1C(=O)Nc2ccc(nc2)N(C)C)n3ncc4cc(cnc34)C#N
CHEMBL3900881	Cc1cncc(n1)c2cc3c(cn2)cnn3c4ccc5OCC(CN)Cc5n4
CHEMBL3901198	CCCc1c(cnn1c2ccccn2)c3csc(n3)c4cc(sc4SC)C(=N)N
CHEMBL3901303	CN1C(=N)N[C@@](C)(CS1(=O)=O)c2sc3c(cccc3c2F)c4ccc(nc4)n5cccn5
CHEMBL3901331	CC(C)Nc1cc(ncc1C(=O)Nc2ccc(OCCN(C)C)cn2)n3ncc4cc(cnc34)C#N
CHEMBL3901481	CCc1cncc(c1)c2cc3c(cn2)cnn3c4cccc(n4)N5CCNCC5
CHEMBL3901533	CCn1cc(cn1)c2cc3c(cn2)cnn3c4cccc(n4)N5CC[C@H](O)C5
CHEMBL3902417	C1CN(CCN1)c2cccc(n2)n3ncc4cnc(cc34)c5cnccn5
CHEMBL3902784	CC(C)Nc1cc(ncc1C(=O)NCCC2(O)CCC(F)(F)CC2)n3ncc4cc(cnc34)C#N
CHEMBL3903061	Cc1ccc(nc1)n2nc(cc2NC(=O)c3cnn4cccnc34)C5(C)CC5
CHEMBL3903828	CC(C)Nc1cc(ncc1C(=O)N[C@@H]2CC[C@H](CC2)NC(=O)[C@H](C)O)n3ncc4cc(cnc34)C#N
CHEMBL3905289	CC(C)Nc1cc(ncc1C(=O)Nc2ccc(nc2)N3CCOCC3)n4ncc5cc(cnc45)C#N
CHEMBL3905519	CCc1cncc(n1)c2cc3c(cn2)cnn3c4cccc(n4)N5CCNCC(O)C5
CHEMBL3905839	CC(C)(O)CCNC(=O)c1cnc(cc1NC2CCOCC2)n3ncc4cc(cnc34)C#N
CHEMBL3906127	Cc1cncc(n1)c2cc3c(cn2)cnn3c4cc(cc(n4)N5CCC[C@H](N)C5)C6COC6
CHEMBL3906421	Cc1cncc(n1)c2cc3c(cn2)cnn3c4cccc(n4)N5CCC[C@H](O)C5
CHEMBL3906500	O=C(Nc1cc(nn1c2ccc(cn2)C3CC3)C4CCN(CC4)C5CCC5)c6cnn7cccnc67
CHEMBL3906798	Cc1nc(cnc1N)c2cc3c(cn2)cnn3c4cccc(n4)N5CCC[C@H](N)C5
CHEMBL3906850	OC1CN(C1)c2cccc(n2)n3ncc4cnc(cc34)c5cnn(CC(F)(F)F)c5
CHEMBL3907004	CCn1cc(cn1)c2cc3c(cn2)cnn3c4cccc(n4)N5CCCNCC5
CHEMBL3907320	Cc1cncc(n1)c2cc3c(cn2)cnn3c4cccc(n4)N5CCC6(CNC6)C5
CHEMBL3907387	CC(C)CCNC(=O)c1cnc(cc1NC(C)C)n2ncc3cc(C#N)c(N)nc23
CHEMBL3907493	OC[C@@H]1CCCN1c2cncc(n2)c3cc4c(cn3)cnn4c5cccc(n5)N6CCNCC6
CHEMBL3907587	Cc1ccc(c(c1)C(=O)N2CCCOC2Cc3cnn(c3)c4ccc(F)cn4)c5ncccn5
CHEMBL3907661	CC(C)Nc1cc(ncc1C(=O)NCCN2CCOCC2)n3ncc4cc(Cl)cnc34
CHEMBL3908035	CC(C)Nc1cc(ncc1C(=O)N[C@H]2CC[C@@H](C2)C(C)(C)O)n3ncc4cc(cnc34)C#N
CHEMBL3908350	CCc1cncc(c1)c2cc3c(cn2)cnn3c4ccc(Cl)c(n4)N5CCC[C@H](N)C5
CHEMBL3908571	CC(C)Oc1ccc(cc1)c2cc(O[C@@H]3C[C@@H]4N(C3)C(=O)[C@@H](NC(=O)OC(C)(C)C(F)(F)F)[C@H](C)C[C@@H](C)CC\C=C/[C@@H]5C[C@]5(NC4=O)C(=O)NS(=O)(=O)C6(C)CC6)cc(n2)n7cccn7
CHEMBL3908853	OC1CNCCN(C1)c2cccc(n2)n3ncc4cnc(cc34)c5cncc(c5)C6COC6
CHEMBL3908856	CCOC(=O)N1CCC(CC1)N2CCC(CC2)c3cc(NC(=O)c4cnn5cccnc45)n(n3)c6ccc(C)cn6
CHEMBL3908966	C[C@H](N)c1ccc(nc1)n2nc(cc2NC(=O)c3cnn4cccnc34)C5CCN(CC5)S(=O)(=O)C
CHEMBL3909061	Cc1ccc(nc1)n2nc(cc2NC(=O)c3cnn4cccnc34)C5CC5
CHEMBL3909176	CC(C)(C)c1cncc(n1)c2cc3c(cn2)cnn3c4cccc(n4)N5CCNCC5
CHEMBL3909280	O[C@H]1CNCCN(C1)c2cccc(n2)n3ncc4cnc(cc34)c5cnn(CC(F)(F)F)c5
CHEMBL3909465	CN(C)C1CC(C1)N2CCC(CC2)c3cc(NC(=O)c4cnn5cccnc45)n(n3)c6ccc(C)cn6
CHEMBL3909749	C[C@@H](CO)Nc1cc(ncc1C(=O)NCCC2CC2)n3ncc4cc(cnc34)C#N
CHEMBL3909947	Cc1cncc(n1)c2cc3c(cn2)cnn3c4cccc(n4)C5(F)CCCNC5
CHEMBL3910109	CC(C)(C)Nc1cc(ncc1C(=O)NCCC(C)(C)F)n2ncc3cc(cnc23)C#N
CHEMBL3910394	CC(C)Nc1cc(ncc1C(=O)Nc2cc3cc[nH]c3cn2)n4ncc5cc(cnc45)C#N
CHEMBL3910536	OCCCc1cncc(n1)c2cc3c(cn2)cnn3c4cccc(n4)N5CCNCC5
CHEMBL3910622	CC[C@@H](CO)Nc1cc(ncc1C(=O)NC[C@@H](F)C(C)(C)O)n2ncc3cc(cnc23)C#N
CHEMBL3910846	CCOCCNC(=O)c1cnc(cc1Nc2cnn(CC(F)F)c2)n3ncc4cc(cnc34)C#N
CHEMBL3910861	CNC(=O)C[C@@H]1CC[C@H](CC1)NC(=O)c2cnc(cc2NC(C)C)n3ncc4cc(cnc34)C#N
CHEMBL3911443	CC(C)Nc1cc(ncc1C(=O)NC[C@@H](F)C(=O)N[C@@H](C)CO)n2ncc3cc(cnc23)C#N
CHEMBL3912863	Cc1ccc(nc1)n2nc(cc2NC(=O)c3cnn4cccnc34)C5CCN(CC5)C6CCC6
CHEMBL3913330	COC1CCN(CC1)c2ccc(NC(=O)c3cnc(cc3NC(C)C)n4ncc5cc(cnc45)C#N)nc2
CHEMBL3913945	Cn1cc(cn1)c2cc3c(cn2)cnn3c4cccc(n4)N5CC(CN)C5
CHEMBL3914088	COc1cnc(NC(=O)c2cnc(cc2NC(C)C)n3ncc4cc(cnc34)C#N)cn1
CHEMBL3914110	COC1(C)CNCCN(C1)c2cccc(n2)n3ncc4cnc(cc34)c5cnn(CC(F)(F)F)c5
CHEMBL3914366	CNC(=O)[C@@H]1CC[C@H](CC1)NC(=O)c2cnc(cc2NC(C)C)n3ncc4cc(Cl)cnc34
CHEMBL3914639	COc1ccc(nc1N2CCC[C@H](N)C2)n3ncc4cnc(cc34)c5cncc(C)n5
CHEMBL3914820	CN1C(=N)N[C@@](C)(CS1(=O)=O)c2sc(cc2F)c3ccnc(c3)n4cccn4
CHEMBL3915323	Cc1cc(sn1)c2cc3c(cn2)cnn3c4cccc(n4)N5CCNCC5
CHEMBL3915913	N[C@H]1CCC[C@@H]1Nc2cncc(n2)c3cc4c(cn3)cnn4c5ccccn5
CHEMBL3916358	CC(C)Nc1cc(ncc1C(=O)NCCC2(O)CC2)n3ncc4cc(cnc34)C#N
CHEMBL3916366	COc1cncc(OC)c1C2CCCC(=O)N2Cc3cccc(n3)n4cccn4
CHEMBL3916413	CC(C)Nc1cc(ncc1C(=O)NCCC(C)O)n2ncc3cc(cnc23)C#N
CHEMBL3916631	CC(C)Nc1cc(ncc1C(=O)N[C@@H]2CC[C@H](CC2)NS(=O)(=O)C)n3ncc4cc(cnc34)C#N
CHEMBL3916844	CN1N=CC(=CC1=O)c2cc3c(cn2)cnn3c4cccc(n4)N5CCCNCC5
CHEMBL3916902	FC(F)Cn1cc(cn1)c2cc3c(cn2)cnn3c4cccc(n4)N5CCCNCC5
CHEMBL3917045	CC(C)Nc1cc(ncc1C(=O)NC2CCN(CC2)S(=O)(=O)NC(C)C)n3ncc4cc(cnc34)C#N
CHEMBL3917077	COc1cncc(n1)c2cc3c(cn2)cnn3c4cccc(n4)N5CCNCC5
CHEMBL3918080	CC(C)(O)[C@@H]1CC[C@H](CC1)NC(=O)c2cnc(cc2Nc3cnn(CC(F)F)c3)n4ncc5cc(cnc45)C#N
CHEMBL3918584	O=C(Nc1cc(nn1c2ccc(cn2)C3CC3)C4CCN(CC4)S(=O)(=O)C5CC5)c6cnn7cccnc67
CHEMBL3919364	CC(C)(O)[C@H](F)CNC(=O)c1cnc(cc1N[C@@H]2CCC[C@@H](C2)C(C)(C)O)n3ncc4cc(cnc34)C#N
CHEMBL3919378	Cn1cc(cn1)c2cc3c(cn2)cnn3c4cccc(n4)N5CC(N)C5
CHEMBL3919520	OCc1cncc(n1)c2cc3c(cn2)cnn3c4cccc(n4)N5CCNCC5
CHEMBL3919786	CNC(=O)[C@@H]1CC[C@H](CC1)NC(=O)c2cnc(cc2N[C@H]3CCCC[C@@H]3F)n4ncc5cc(C#N)c(N)nc45
CHEMBL3919803	CCNC(=O)CCNC(=O)c1cnc(cc1NC(C)C)n2ncc3cc(cnc23)C#N
CHEMBL3919895	COc1cccc(OC)c1C2CC(C)C(=O)N2Cc3ccnc(c3)n4cccn4
CHEMBL3920387	COc1cc(NC(=O)c2cnn3cccnc23)n(n1)c4ccc(C)cn4
CHEMBL3920482	CCNC(=O)c1cnc(cc1Nc2cnn(CC(F)F)c2)n3ncc4cc(cnc34)C#N
CHEMBL3920485	Cc1ccc(nc1)n2nc(cc2NC(=O)c3cnn4cccnc34)C5CCN(CC5)C6CCN(CC6)C7CC7
CHEMBL3920512	Cc1ccc(nc1)n2nc(cc2NC(=O)c3cnn4cc(cnc34)C#C)C5CCN(CC5)S(=O)(=O)C
CHEMBL3920766	CC(C)Nc1cc(ncc1C(=O)NCCC(C)(F)F)n2ncc3cc(cnc23)C#N
CHEMBL3921310	CC(C)CN1CCC(CC1)c2cc(NC(=O)c3cnn4cccnc34)n(n2)c5ccc(C)cn5
CHEMBL3921423	CNC(C)c1ccc(nc1)n2nc(cc2NC(=O)c3cnn4cccnc34)C5CCN(CC5)S(=O)(=O)C
CHEMBL3921475	Cc1ccn(n1)c2cccc(n2)c3c[nH]c4ccc(cc34)c5nnc(N)s5
CHEMBL3921650	COc1cccc(F)c1C2CC(C)C(=O)N2Cc3ccnc(c3)n4cccn4
CHEMBL3921909	CC(C)Nc1cc(ncc1C(=O)NCCC2CCN(CC2)C(=O)C[N+]#[C-])n3ncc4cc(cnc34)C#N
CHEMBL3922192	CC(C)CCNC(=O)c1cnc(cc1N[C@@H](C)CO)n2ncc3cc(cnc23)C#N
CHEMBL3922334	CC(C)Nc1cc(ncc1C(=O)NCCC2(O)CCCC2)n3ncc4cc(cnc34)C#N
CHEMBL3922407	Cc1ccc(nc1)n2nc(cc2NC(=O)c3cnn4cccnc34)C5CCN(CC6CC6)CC5
CHEMBL392243	C[C@@H]1CN([C@H](C)CO1)c2c(C#N)c(nn2c3ccc(cn3)S(=O)(=O)C)C(F)(F)F
CHEMBL3922475	CC(C)Nc1cc(ncc1C(=O)NCCC(C)NS(=O)(=O)C)n2ncc3cc(cnc23)C#N
CHEMBL3922475	CC(C)Nc1cc(ncc1C(=O)NCCC(C)NS(=O)(=O)C)n2ncc3cc(cnc23)C#N
CHEMBL3922501	CC(C)(CN)c1ccc(nc1)n2nc(cc2NC(=O)c3cnn4cccnc34)C5CCN(CC5)S(=O)(=O)C
CHEMBL3922549	Cc1cncc(n1)c2cc3c(cn2)cnn3c4ccc(C5CC5)c(n4)N6CCCNCC6
CHEMBL3923081	CC(C)Nc1cc(ncc1C(=O)NCc2nn[nH]n2)n3ncc4cc(cnc34)C#N
CHEMBL3923198	COC1CCC(O)(CCNC(=O)c2cnc(cc2NC(C)C)n3ncc4cc(cnc34)C#N)CC1
CHEMBL3923273	CC(C)Nc1cc(ncc1C(=O)NCCC(C)(C)O)n2ncc3cc(cnc23)C#N
CHEMBL3923791	CC(C)Nc1cc(ncc1C(=O)NCCc2ccc(cc2)N(CS(=O)=O)S(=O)(=O)C)n3ncc4cc(cnc34)C#N
CHEMBL3923977	CC(C)Nc1cc(ncc1C(=O)Nc2ccc(cc2)N3CCOCC3)n4ncc5cc(cnc45)C#N
CHEMBL3924029	Cc1ccc(nc1)n2nc(cc2NC(=O)c3cnn4cccnc34)C5CCNCC5
CHEMBL3924152	CCn1cc(cn1)c2cc3c(cn2)cnn3c4cccc(n4)N5CC[C@H](N)C5
CHEMBL3924209	C[C@H](F)CNc1cc(ncc1C(=O)NC[C@@H](F)C(C)(C)O)n2ncc3cc(C#N)c(N)nc23
CHEMBL3924274	CC(C)CCNC(=O)c1cnc(cc1NC(C)C)n2ncc3cc(cnc23)C#N
CHEMBL3924823	Cc1ccc(c(c1)C(=O)N2CCCOC2Cc3cnn(c3)c4ccc(F)cn4)n5nccn5
CHEMBL3924903	Cc1cncc(n1)c2cc3c(cn2)cnn3c4cccc(OC5CCCC(N)C5)n4
CHEMBL3925280	CC(C)Nc1cc(ncc1C(=O)NCCC2(O)CCOCC2)n3ncc4cc(cnc34)C#N
CHEMBL3925644	CC(C)Nc1cc(ncc1C(=O)N[C@@H]2CC[C@H](CC2)NC(=O)C)n3ncc4cc(cnc34)C#N
CHEMBL3926007	Cc1cncc(n1)c2cc3c(cn2)cnn3c4cccc(n4)C5CNCCC5(F)F
CHEMBL3926346	CN1[C@@H]2COC[C@H]1C[C@H](C2)NC(=O)c3nn(c4ccccn4)c5ccccc35
CHEMBL3926614	NCC1CN(C1)c2cccc(n2)n3ncc4cnc(cc34)c5cnn(CC(F)(F)F)c5
CHEMBL3927317	CC(C)Nc1cc(ncc1C(=O)NCCC2(O)CCC(C)(O)CC2)n3ncc4cc(cnc34)C#N
CHEMBL3927743	CC(C)Nc1cc(ncc1C(=O)NCC(F)C2(O)COC2)n3ncc4cc(Cl)cnc34
CHEMBL3927952	CC1C(N)CCCN1c2cccc(n2)n3ncc4cnc(cc34)c5cncc(C)n5
CHEMBL3927995	Cc1ccc(cc1)c2cc(NC(=O)c3cnn4cc(Cl)cnc34)n(n2)c5ccc(C)cn5
CHEMBL3929011	Cc1cncc(n1)c2cc3c(cn2)cnn3c4cccc(n4)C5CCCC(N)C5
CHEMBL3929264	CC(C)n1cc(cn1)c2cc3c(cn2)cnn3c4cccc(n4)N5CCCNCC5
CHEMBL3929907	CC[C@@H](N[C@@H](C)CC(=O)N)c1ccc(Cl)c(C(=O)c2ccc(nc2)n3cccn3)c1F
CHEMBL3930402	CCn1cc(cn1)c2cc3c(cn2)cnn3c4cccc(NC5CCCCNC5)n4
CHEMBL3930725	C[C@]1(O)CNCCN(C1)c2cccc(n2)n3ncc4cnc(cc34)c5cnn(CC(F)(F)F)c5
CHEMBL3930748	CC(C)(O)[C@H](F)CNC(=O)c1cnc(cc1N[C@H]2CC[C@@H](C2)C(C)(C)O)n3ncc4cc(Cl)cnc34
CHEMBL3930816	CCc1cncc(c1)c2cc3c(cn2)cnn3c4ccc(C5CC5)c(n4)N6CCC[C@H](N)C6
CHEMBL3930830	CCCCNC(=O)c1cnc(cc1NC(C)C)n2ncc3cc(cnc23)C#N
CHEMBL3931274	CNc1cccc(n1)n2ncc3cnc(cc23)c4cncc(C)n4
CHEMBL3931279	Cc1cncc(n1)c2cc3c(cn2)cnn3c4cccc(n4)C5CCNCC5
CHEMBL3931392	CC(C)Nc1cc(ncc1C(=O)NCCC2CCN(C)CC2)n3ncc4cc(cnc34)C#N
CHEMBL3931420	COc1ccc(nc1)n2nc(cc2NC(=O)c3cnn4cccnc34)C5CCN(CC5)S(=O)(=O)C
CHEMBL3931480	COC1CCN(CC1)c2ccc(NC(=O)c3cnc(cc3NC(C)C)n4ncc5cc(cnc45)C#N)cn2
CHEMBL3931506	COC(=O)NCC1CCC(CC1)c2cc(NC(=O)c3cnn4cccnc34)n(n2)c5ccc(C)cn5
CHEMBL3932227	CC(C)Nc1cc(ncc1C(=O)N[C@@H]2CC[C@H](CC2)C(C)(C)O)n3ncc4cc(C)cnc34
CHEMBL3932475	Cc1cncc(n1)c2cc3c(cn2)cnn3c4ccc(C5CC5)c(n4)N6CCC[C@H](N)C6
CHEMBL3932554	CC(C)Nc1cc(ncc1C(=O)Nc2cnn(c2)C3CN(C3)S(=O)(=O)C)n4ncc5cc(cnc45)C#N
CHEMBL3932579	CC(C)Nc1cc(ncc1C(=O)NCCC2(O)CCN(C)CC2)n3ncc4cc(cnc34)C#N
CHEMBL3932627	Cn1cc(c2ccc3nc(NC(=O)c4ccc(nc4)n5cccn5)cn3n2)c(n1)c6ccc(F)cc6
CHEMBL3932942	CC(C)NC(=O)c1cnc(cc1Nc2cnn(CC(F)F)c2)n3ncc4cc(cnc34)C#N
CHEMBL3932967	O=C(Nc1cc(nn1c2ccc(cn2)C3CC3)C4CCNCC4)c5cnn6cccnc56
CHEMBL3933351	CC(C)Nc1cc(ncc1C(=O)NC[C@H](F)C(C)(C)O)n2ncc3cc(cnc23)C#N
CHEMBL3933400	CC(F)[C@H](C)Nc1cc(ncc1C(=O)NC[C@@H](F)C(C)(C)O)n2ncc3cc(cnc23)C#N
CHEMBL3933431	CS(=O)(=O)N1CCC(CC1)c2cc(NC(=O)c3cnn4cccnc34)n(n2)c5ccc(C=O)cn5
CHEMBL3933868	OCC(O)c1cncc(n1)c2cc3c(cn2)cnn3c4cccc(n4)N5CCNCC5
CHEMBL3933904	C[C@H](F)CNc1cc(ncc1C(=O)NC[C@@H](F)C(C)(C)O)n2ncc3cc(cnc23)C#N
CHEMBL3934298	Cc1cncc(n1)c2cc3c(cn2)cnn3c4cccc(n4)N5CC(O)C(O)C5
CHEMBL3934315	Cc1cncc(n1)c2cc3c(cn2)cnn3c4ccc(c(n4)N5CCNCC(O)C5)C(F)(F)F
CHEMBL3934383	OCC#Cc1cncc(n1)c2cc3c(cn2)cnn3c4cccc(n4)N5CCNCC5
CHEMBL3934442	Fc1ccc(nc1)n2cc(CC3OCCCN3C(=O)c4cc(F)ccc4c5ncccn5)cn2
CHEMBL3934549	CCS(=O)(=O)N1CCC(CC1)NC(=O)c2cnc(cc2NC(C)C)n3ncc4cc(cnc34)C#N
CHEMBL3934585	OC(=O)C1=CN(CC2(CCCC2)c3ccnc(c3)n4cccn4)C=C(O)C1=O
CHEMBL3935096	Cc1cncc(n1)c2cc3c(cn2)cnn3c4cccc(n4)N5CCC[C@H](N)C5
CHEMBL393581	C[C@@H]1CCCN1CCc2ccc3nc(ccc3c2)c4cnn(c4C)c5ccccn5
CHEMBL3936270	CC(C)Nc1cc(ncc1C(=O)Nc2cnn(c2)C3CCOCC3)n4ncc5cc(cnc45)C#N
CHEMBL3936302	Cc1ccc(nc1)n2nc(cc2NC(=O)c3cnn4cccnc34)C5CCN(CC5)C6CCC(CC6)C(F)(F)F
CHEMBL3936335	CN1C(=N)N[C@@](C)(CS1(=O)=O)c2sc(cc2F)c3ccnc(c3)n4cc(C)cn4
CHEMBL3936665	COc1cccc(OC)c1C2CCCCC(=O)N2Cc3ccnc(c3)n4cccn4
CHEMBL3936808	OC1CNCCN(C1)c2cccc(n2)n3ncc4cnc(cc34)c5cncc(c5)C6CC6
CHEMBL3936809	CC1CCCC(C1)N2CCC(CC2)c3cc(NC(=O)c4cnn5cccnc45)n(n3)c6ccc(C)cn6
CHEMBL3936900	CS(=O)(=O)N1CCC(CC1)c2cc(NC(=O)c3cnn4cccnc34)n(n2)c5ccc(CO)cn5
CHEMBL3937034	Cn1cc(cn1)c2cc3c(cn2)cnn3c4cccc(n4)N5CCNCC(O)C5
CHEMBL393709	CS(=O)(=O)c1ccc(nc1)n2nc(c(C#N)c2NC3CCC3)C(F)(F)F
CHEMBL3937096	CC1CN(CCN1)c2cccc(n2)n3ncc4cnc(cc34)c5cncc(C)n5
CHEMBL393711	CS(=O)(=O)c1ccc(nc1)n2nc(c(C#N)c2NC3CCCC3)C(F)(F)F
CHEMBL3937209	Cc1cncc(n1)c2cc3c(cn2)cnn3c4cccc(n4)N5CCCCC(N)C5
CHEMBL3937404	Cc1ccc(nc1)n2nc(cc2NC(=O)c3cnn4cccnc34)C5CCN(CC5)C6CCc7ccncc7C6
CHEMBL3937950	CC(C)(O)C(F)(F)CNC(=O)c1cnc(cc1Nc2cnn(CC(F)F)c2)n3ncc4cc(cnc34)C#N
CHEMBL3938253	Cc1ccc(nc1)n2nc(cc2NC(=O)c3cnn4cccnc34)C5CCC(CN)CC5
CHEMBL3938325	CC(C)Nc1cc(ncc1C(=O)Nc2cnc(nc2)N3CCOCC3)n4ncc5cc(cnc45)C#N
CHEMBL3938583	CCn1cc(cn1)c2cc3c(cn2)cnn3c4cccc(n4)N5CCNC(C)(C)C5
CHEMBL3938709	CC(C)Nc1cc(ncc1C(=O)NCC(=C2CCOCC2)F)n3ncc4cc(cnc34)C#N
CHEMBL3938766	CC(C)CNC(=O)c1cnc(cc1Nc2cnn(CC(F)F)c2)n3ncc4cc(cnc34)C#N
CHEMBL3939101	C1CNCCN(C1)c2cccc(n2)n3ncc4cnc(cc34)c5cncc(c5)C6COC6
CHEMBL3939394	Cc1cncc(c1)c2cc3c(cn2)cnn3c4cccc(n4)N5CCCNCC5
CHEMBL3940216	COc1cccc(OC)c1C2CCCC(=O)N2Cc3cccc(n3)n4cccn4
CHEMBL3940227	NC(=O)Cn1cc(cn1)c2cc3c(cn2)cnn3c4cccc(n4)N5CCCNCC5
CHEMBL3940416	CC(C)Nc1cc(ncc1C(=O)NCCC2(O)CCNC2)n3ncc4cc(cnc34)C#N
CHEMBL3940677	CS(=O)(=O)N1CCC(CC1)c2cc(NC(=O)c3cnn4cccnc34)n(n2)c5ccccn5
CHEMBL3940744	Cc1cncc(n1)c2cc3c(cn2)cnn3c4ccc(C(F)F)c(n4)N5CCC[C@H](N)C5
CHEMBL394096	CS(=O)(=O)c1ccc(nc1)n2nc(C(F)F)c(C#N)c2c3cc(F)cc(F)c3
CHEMBL3942104	Cc1ccc(nc1N2CCNC[C@H](O)C2)n3ncc4cnc(cc34)c5cnn(CC(F)(F)F)c5
CHEMBL3942281	CC(C)Nc1cc(ncc1C(=O)Nc2ccc(O)cn2)n3ncc4cc(cnc34)C#N
CHEMBL3942383	CC(C)Nc1cc(ncc1C(=O)NCCN2CCOCC2)n3ncc4cc(cnc34)C#N
CHEMBL3942446	FCCn1cc(cn1)c2cc3c(cn2)cnn3c4cccc(n4)N5CCCNCC5
CHEMBL3943142	CC(C)Nc1cc(ncc1C(=O)NCCNS(=O)(=O)C)n2ncc3cc(cnc23)C#N
CHEMBL3943289	CC(C)(O)[C@@H]1CC[C@H](CC1)NC(=O)c2cnc(cc2NC3COC3)n4ncc5cc(Cl)cnc45
CHEMBL3943689	Cc1ccc(nc1)n2nc(cc2NC(=O)c3cnn4cccnc34)C5CCN(CC5)C6CCCOC6
CHEMBL3943705	CCc1cncc(n1)c2cc3c(cn2)cnn3c4cccc(n4)N5CCCNCC5
CHEMBL3943759	Cc1cncc(n1)c2cc3c(cn2)cnn3c4cccc(n4)N5CC[C@H](N)C5
CHEMBL3943778	NC1CN(C1)c2cccc(n2)n3ncc4cnc(cc34)c5cnn(CC(F)(F)F)c5
CHEMBL3944062	Cc1cncc(n1)c2cc3c(cn2)cnn3c4cccc(n4)N5CCNCC5
CHEMBL3944351	CC(C)Nc1cc(ncc1C(=O)NCCC2(O)CCOC2)n3ncc4cc(cnc34)C#N
CHEMBL3944757	C1CNCCN(C1)c2cccc(n2)n3ncc4cnc(cc34)c5cnn(c5)C6CCC6
CHEMBL3944819	C(C1CC1)n2cc(cn2)c3cc4c(cn3)cnn4c5cccc(n5)N6CCCNCC6
CHEMBL3944928	COc1ccc(CCNC(=O)c2cnc(cc2NC(C)C)n3ncc4cc(cnc34)C#N)cc1
CHEMBL3945366	CC(C)(C)NC(=O)c1cnc(cc1Nc2cnn(CC(F)F)c2)n3ncc4cc(cnc34)C#N
CHEMBL3945694	CCN1CCC(CC1)N2CCC(CC2)c3cc(NC(=O)c4cnn5cccnc45)n(n3)c6ccc(C)cn6
CHEMBL3945782	NC(=O)c1ccc(nc1)n2nc(cc2NC(=O)c3cnn4cccnc34)C5CCNCC5
CHEMBL3945877	Cc1ccc(cc1)c2cc(NC(=O)c3cnn4cccnc34)n(n2)c5ccc(C)cn5
CHEMBL3946151	CC(C)Nc1cc(ncc1C(=O)NC2CCN(CC2)c3ncccn3)n4ncc5cc(cnc45)C#N
CHEMBL3946284	Fc1ccc(cc1)N2CCC(C2)N3CCC(CC3)c4cc(NC(=O)c5cnn6cccnc56)n(n4)c7ccccn7
CHEMBL3946306	Clc1cncc(n1)c2cc3c(cn2)cnn3c4cccc(n4)N5CCNCC5
CHEMBL3946452	Cc1ccc(cc1)c2cc(NC(=O)c3cnn4cccnc34)n(n2)c5ccc(cn5)C6CC6
CHEMBL3946464	OCCNc1cncc(n1)c2cc3c(cn2)cnn3c4cccc(n4)N5CCNCC5
CHEMBL3946848	CC(C)Nc1cc(ncc1C(=O)Nc2cnn(CC(F)F)c2)n3ncc4cc(cnc34)C#N
CHEMBL3946970	CCc1cncc(n1)c2cc3c(cn2)cnn3c4cccc(n4)N5CCNCC5
CHEMBL3947309	C=Cc1cncc(n1)c2cc3c(cn2)cnn3c4cccc(n4)N5CCNCC5
CHEMBL3947484	CC(C)c1cncc(c1)c2cc3c(cn2)cnn3c4cccc(n4)N5CCNCC5
CHEMBL3947585	CC(C)Nc1cc(ncc1C(=O)NCCN2CCS(=O)(=O)CC2)n3ncc4cc(cnc34)C#N
CHEMBL3947770	CCN1C=NC=C(C1=O)c2cc3c(cn2)cnn3c4cccc(n4)N5CCNCC5
CHEMBL3948538	CC(C)Nc1cc(ncc1C(=O)NC[C@@H](F)C(C)(C)O)n2ncc3cc(cnc23)C#N
CHEMBL3948919	CC(C)Nc1cc(ncc1C(=O)N[C@@H]2CC[C@H](CC2)C(C)(C)O)n3ncc4cc(Cl)cnc34
CHEMBL3949274	C[C@H]1CNCCN1c2cccc(n2)n3ncc4cnc(cc34)c5cncc(C)n5
CHEMBL3949690	CC(C)Nc1cc(ncc1C(=O)NCCc2cccnc2)n3ncc4cc(cnc34)C#N
CHEMBL3950330	CC(C)Nc1cc(ncc1C(=O)NCC(F)C2CCOCC2)n3ncc4cc(cnc34)C#N
CHEMBL3950439	Cc1ccc(cc1)c2cc(NC(=O)c3cnn4cc(cnc34)C5CC5)n(n2)c6ccc(C)cn6
CHEMBL3950483	CN1CCC(CC1)N2CCC(CC2)c3cc(NC(=O)c4cnn5cccnc45)n(n3)c6ccc(C)cn6
CHEMBL3950820	CO[C@@]1(C)CNCCN(C1)c2cccc(n2)n3ncc4cnc(cc34)c5cnn(CC(F)(F)F)c5
CHEMBL3951088	C1CNCCN(C1)c2cccc(n2)n3ncc4cnc(cc34)c5cncc(c5)C6CC6
CHEMBL3951199	CC(C)Nc1cc(ncc1C(=O)NCC(F)C2(O)COC2)n3ncc4cc(cnc34)C#N
CHEMBL3951256	Cc1ccc(nc1)n2nc(cc2NC(=O)c3cnn4cccnc34)N5CCN(CC5)C6CCCC6
CHEMBL3951387	Cc1cncc(n1)c2cc3c(cn2)cnn3c4cccc(n4)C(=O)N5CCC[C@H](N)C5
CHEMBL3951560	CC1CCC(C1)N2CCC(CC2)c3cc(NC(=O)c4cnn5cccnc45)n(n3)c6ccc(C)cn6
CHEMBL3951721	CCCCNC(=O)c1cnc(cc1NC2COC2)n3ncc4cc(C#N)c(N)nc34
CHEMBL3951741	C1CN(C1)c2cncc(n2)c3cc4c(cn3)cnn4c5cccc(n5)N6CCNCC6
CHEMBL3951794	CC(C)(O)[C@H](F)CNC(=O)c1cnc(cc1N[C@@H]2C[C@H]2CO)n3ncc4cc(Cl)cnc34
CHEMBL3952360	Cc1cncc(n1)c2cc3c(cn2)cnn3c4cccc(n4)N5CCC[C@H](N)C5=O
CHEMBL3952402	CN(C1CCC(CC1)N2CCC(CC2)c3cc(NC(=O)c4cnn5cccnc45)n(n3)c6ccc(C)cn6)S(=O)(=O)C
CHEMBL3952515	Cc1ccc(c(c1)C(=O)N2CCOC2Cc3cnn(c3)c4ccc(F)cn4)n5nccn5
CHEMBL3952777	CC(C)Nc1cc(ncc1C(=O)NCCC2CC2)n3ncc4cc(cnc34)C#N
CHEMBL3952845	CC(C)c1cncc(c1)c2cc3c(cn2)cnn3c4cccc(n4)N5CCC[C@H](N)C5
CHEMBL3952989	Cc1cncc(n1)c2cc3c(cn2)cnn3c4ccc(C)c(n4)N5CCC[C@H](N)C5=O
CHEMBL3953023	CC(C)Nc1cc(ncc1C(=O)NCCC2CCCCO2)n3ncc4cc(cnc34)C#N
CHEMBL3953153	CNC(=O)[C@@H]1CC[C@H](CC1)NC(=O)c2cnc(cc2N[C@@H](C)CF)n3ncc4cc(cnc34)C#N
CHEMBL3953164	Cc1cncc(n1)c2cc3c(cn2)cnn3c4ccc(F)c(n4)N5CCC[C@H](N)C5
CHEMBL3953482	CC(C)(C)n1cc(cn1)c2cc3c(cn2)cnn3c4cccc(n4)N5CCCNCC5
CHEMBL3953510	CC(C)Nc1cc(ncc1C(=O)N[C@@H]2CC[C@H](CC2)S(=O)(=O)C)n3ncc4cc(cnc34)C#N
CHEMBL3953652	CC(C)Nc1cc(ncc1C(=O)NCC2CC2C(C)(C)O)n3ncc4cc(C#N)c(N)nc34
CHEMBL3953849	Cc1cncc(n1)c2cc3c(cn2)cnn3c4cccc(n4)N5CCNCCC5=O
CHEMBL3953990	C1CN(CCN1)c2cccc(n2)n3ncc4cnc(cc34)c5cncs5
CHEMBL3954291	CC(C)Nc1cc(ncc1C(=O)Nc2ccc(CN3CCOCC3)cc2)n4ncc5cc(cnc45)C#N
CHEMBL3954452	CC(C)Nc1cc(ncc1C(=O)NCCc2ccncc2)n3ncc4cc(cnc34)C#N
CHEMBL3954542	CC(C)Nc1cc(ncc1C(=O)NCC(=O)N2CCOCC2)n3ncc4cc(cnc34)C#N
CHEMBL3954582	Cc1ccc(nc1)n2nc(cc2NC(=O)c3cnn4cccnc34)N5CCOCC5
CHEMBL3954925	COC1CCC(CC1)NC(=O)c2cnc(cc2NC(C)C)n3ncc4cc(cnc34)C#N
CHEMBL3955423	CC(C)Nc1cc(ncc1C(=O)NCCc2c[nH]cn2)n3ncc4cc(cnc34)C#N
CHEMBL3955569	CC(C)Nc1cc(ncc1C(=O)NCCCN2CCOCC2)n3ncc4cc(cnc34)C#N
CHEMBL3955604	COC1(CCCNC1)c2cccc(n2)n3ncc4cnc(cc34)c5cncc(C)n5
CHEMBL3956155	CCc1cncc(c1)c2cc3c(cn2)cnn3c4cccc(n4)N5CCNC[C@H](O)C5
CHEMBL3956279	CC(C)Nc1cc(ncc1C(=O)NCCCc2ncn[nH]2)n3ncc4cc(cnc34)C#N
CHEMBL3956440	CS(=O)(=O)CCn1cc(cn1)c2cc3c(cn2)cnn3c4cccc(n4)N5CCCNCC5
CHEMBL3956717	Cc1cncc(n1)c2cc3c(cn2)cnn3c4cccc(n4)N5CCC6(CCNCC6)C5
CHEMBL3956904	Cc1nn(C)c2nc(ccc12)n3nc(cc3NC(=O)c4cnn5cccnc45)C6CCN(CC6)S(=O)(=O)C
CHEMBL3956976	CC(C)CCNC(=O)c1cnc(cc1NC2COC2)n3ncc4cc(cnc34)C#N
CHEMBL3957118	Cc1cncc(n1)c2cc3c(cn2)cnn3c4ccc(C)c(n4)N5C[C@@H](N)CCC5=O
CHEMBL3957997	FC(F)c1cncc(n1)c2cc3c(cn2)cnn3c4cccc(n4)N5CCNCC5
CHEMBL3958302	CCn1cc(cn1)c2cc3c(cn2)cnn3c4cccc(n4)N5CCCC(N)CC5
CHEMBL3958341	CC(C)Nc1cc(ncc1C(=O)NC2CCN(CC2)C(=O)C3CN(C3)S(=O)(=O)C)n4ncc5cc(cnc45)C#N
CHEMBL3958433	Cc1ccc(nc1)n2nc(cc2NC(=O)c3cnn4cc(Br)cnc34)C5CCN(CC5)S(=O)(=O)C
CHEMBL3958435	Cc1cncc(n1)c2cc3c(cn2)cnn3c4cccc(n4)N5CC6(CCNC6)C5
CHEMBL3958785	C1CN(CCN1)c2cccc(n2)n3ncc4cnc(cc34)c5cncc(n5)C6CC6
CHEMBL3959083	Cn1cc(cn1)c2cc3c(cn2)cnn3c4cccc(n4)C5(O)CCCNCC5
CHEMBL3959634	Cn1cc(cn1)c2cc3c(cn2)cnn3c4cccc(n4)N5CC(O)(CN)C5
CHEMBL3960442	CN1CCC(CC1)c2cc(NC(=O)c3cnn4cccnc34)n(n2)c5ccc(cn5)C6CC6
CHEMBL3960453	NCCOc1cncc(n1)c2cc3c(cn2)cnn3c4cccc(n4)N5CCNCC5
CHEMBL3960554	Cc1cncc(n1)c2cc3c(cn2)cnn3c4cccc(n4)N5CCCNCC5
CHEMBL3960714	CNS(=O)(=O)N1CCC(CC1)NC(=O)c2cnc(cc2NC(C)C)n3ncc4cc(cnc34)C#N
CHEMBL3960858	C1CNCCN(C1)c2cccc(n2)n3ncc4cnc(cc34)c5cncnc5
CHEMBL3961287	COc1ccc(nc1N2CCCNC2=O)n3ncc4cnc(cc34)c5cncc(C)n5
CHEMBL3961360	OCCOc1cncc(n1)c2cc3c(cn2)cnn3c4cccc(n4)N5CCNCC5
CHEMBL3961524	CNC(=O)c1cnc(cc1NC(C)C)n2ncc3cc(C#N)c(N)nc23
CHEMBL3961525	CCn1cc(cn1)c2cc3c(cn2)cnn3c4cccc(n4)N5CCNCC5
CHEMBL3961692	Nc1cncc(n1)c2cc3c(cn2)cnn3c4cccc(n4)N5CCCNCC5
CHEMBL3961823	Cc1cncc(n1)c2cc3c(cn2)cnn3c4ccc(c(n4)N5CCC[C@H](N)C5)C(F)(F)F
CHEMBL3962157	Cc1ccc(cc1)c2cc(C(=O)Nc3ccc(N)cc3)n(n2)c4ccc5ccccc5n4
CHEMBL3962169	Cc1ccc(nc1)n2nc(cc2NC(=O)c3cnn4cccnc34)C5CCC(N)CC5
CHEMBL3962404	CN1CCN(CC1)S(=O)(=O)c2ccc(cc2)c3cc(NC(=O)c4cnn5cccnc45)n(n3)c6ccc(C)cn6
CHEMBL3962443	CC(C)Nc1cc(ncc1C(=O)N[C@H]2CCCN(C2)S(=O)(=O)C)n3ncc4cc(cnc34)C#N
CHEMBL3962811	COc1cccc(OC)c1C2CCCCC(=O)N2Cc3cccc(n3)n4cccn4
CHEMBL3963170	N[C@H]1CCC[C@@H]1Oc2cncc(n2)c3cc4c(cn3)cnn4c5ccccn5
CHEMBL3963318	CC(C)CN1CCN(CC1)c2cc(NC(=O)c3cnn4cccnc34)n(n2)c5ccc(C)cn5
CHEMBL3963886	CC(C)Nc1cc(ncc1C(=O)NCCc2ccc(NC(=O)C)cc2)n3ncc4cc(cnc34)C#N
CHEMBL3963946	CCn1cc(cn1)c2cc3c(cn2)cnn3c4cccc(n4)N5CCC[C@H](N)C5
CHEMBL3963960	CC1(CC1)c2cc(NC(=O)c3cnn4cccnc34)n(n2)c5ccc(CN)cn5
CHEMBL3964003	CC(C)Nc1cc(ncc1C(=O)NC2(CC2)[N+]#[C-])n3ncc4cc(C#N)c(N)nc34
CHEMBL3964419	CCOc1cccc(F)c1C2CC(C)C(=O)N2Cc3ccnc(c3)n4cccn4
CHEMBL3964623	Cc1ccc(nc1)n2nc(cc2NC(=O)c3cnn4cc(cnc34)[N+]#[C-])C5CCN(CC5)S(=O)(=O)C
CHEMBL3965205	CC(C)(O)[C@H](F)CNC(=O)c1cnc(cc1N[C@H]2CCOC2)n3ncc4cc(cnc34)C#N
CHEMBL3965243	Cc1cncc(n1)c2cc3c(cn2)cnn3c4cccc(n4)N5CCC(O)C(O)C5
CHEMBL3965741	C1CN(CCN1)c2cccc(n2)n3ncc4cnc(cc34)c5cncc(c5)C6COC6
CHEMBL3965756	CCOP(=O)(CCNC(=O)c1cnc(cc1NC(C)C)n2ncc3cc(cnc23)C#N)OCC
CHEMBL3966110	CC(C)Nc1cc(ncc1C(=O)NC2CCN(CC2)S(=O)(=O)C(C)C)n3ncc4cc(cnc34)C#N
CHEMBL3966696	Cc1cncc(n1)c2cc3c(cn2)cnn3c4cccc(n4)N5CCC(N)CC5
CHEMBL3967229	CC(C)Nc1cc(ncc1C(=O)Nc2cnn(CC(C)(C)O)c2)n3ncc4cc(cnc34)C#N
CHEMBL3967712	CC[C@H](C)Nc1cc(ncc1C(=O)NC[C@@H](F)C(C)(C)O)n2ncc3cc(cnc23)C#N
CHEMBL3967961	OC(=O)c1ccc(nc1)n2nc(Oc3c(Cl)cccc3Cl)c4ccccc24
CHEMBL3968140	CCn1cc(cn1)c2cc3c(cn2)cnn3c4cccc(n4)N5CCC(N)CC5
CHEMBL3968206	CCn1cc(cn1)c2cc3c(cn2)cnn3c4cccc(n4)N5CCN[C@@H](C)C5
CHEMBL3968759	Cc1ccc(nc1)n2nc(cc2NC(=O)c3ncn4cccnc34)c5ccc(cc5)S(=O)(=O)N6CCOCC6
CHEMBL3968789	C1CNCCN(C1)c2cccc(n2)n3ncc4cnc(cc34)c5cn[nH]c5
CHEMBL3968874	Cn1cc(cn1)c2cc3c(cn2)cnn3c4cccc(n4)N5CC(O)C5
CHEMBL3969785	Cc1ccc(nc1)n2nc(cc2NC(=O)c3cnn4cccnc34)C5CCN(CC5)C6CCC(CC6)C#N
CHEMBL3970139	CCCNC(=O)c1cnc(cc1NC(C)C)n2ncc3cc(C#N)c(N)nc23
CHEMBL3970183	Cc1cncc(n1)c2cc3c(cn2)cnn3c4cccc(n4)N5C[C@@H](N)CCC5=O
CHEMBL3970192	CC(C)Nc1cc(ncc1C(=O)Nc2ccc(cn2)N3CCN(C)CC3)n4ncc5cc(cnc45)C#N
CHEMBL3970681	Cn1cc(cn1)c2cc3c(cn2)cnn3c4cccc(n4)N5CC6(CNC6)C5
CHEMBL3970953	Cc1cncc(n1)c2cc3c(cnn3c4cccc(n4)N5CCNCC5)nn2
CHEMBL3970981	N#CCn1cc(cn1)c2cc3c(cn2)cnn3c4cccc(n4)N5CCCNCC5
CHEMBL3971510	CCCNC(=O)c1cnc(cc1Nc2cnn(CC(F)F)c2)n3ncc4cc(cnc34)C#N
CHEMBL3972016	CN1CCN(CC1)c2cc(NC(=O)c3cnn4cccnc34)n(n2)c5ccc(cn5)C6CC6
CHEMBL3972017	Cc1cncc(n1)c2cc3c(cn2)cnn3c4cccc(n4)N5CCCC6(CN(C6)C=O)C5
CHEMBL3972050	FC(F)(F)Cn1cc(cn1)c2cc3c(cn2)cnn3c4cccc(n4)N5CCCNCC5
CHEMBL3972360	CN1CCC(CC1)c2cc(NC(=O)c3cnn4cccnc34)n(n2)c5ccc(C)cn5
CHEMBL3972453	C(Oc1cncc(n1)c2cc3c(cn2)cnn3c4cccc(n4)N5CCNCC5)c6ccccc6
CHEMBL3973052	CC(C)Nc1cc(ncc1C(=O)Nc2ccc(cn2)N3CCOCC3)n4ncc5cc(cnc45)C#N
CHEMBL3973175	Cc1cncc(n1)c2cc3c(cn2)cnn3c4cccc(n4)C5=CCNCC5
CHEMBL3973484	CC(C)Nc1cc(ncc1C(=O)Nc2cnn(c2)C3COC3)n4ncc5cc(cnc45)C#N
CHEMBL3973544	Cc1cc(sn1)c2cc3c(cn2)cnn3c4cccc(n4)N5CCC[C@H](N)C5
CHEMBL3973967	CO[C@@H]1CC[C@H](CC1)NC(=O)c2cnc(cc2NC3COC3)n4ncc5cc(cnc45)C#N
CHEMBL3974800	Cc1cncc(n1)c2cc3c(cn2)cnn3c4cccc(n4)C5(O)CCCNC5
CHEMBL3975198	Cc1cncc(n1)c2cc3c(cn2)cnn3c4cccc(n4)N5C[C@@H](N)C[C@H](F)C5
CHEMBL3975199	N#Cc1cncc(n1)c2cc3c(cn2)cnn3c4cccc(n4)N5CCNCC5
CHEMBL3975331	Cc1ccc(nc1)n2nc(cc2NC(=O)c3cnn4cccnc34)N5CCN(CC5)C6CCCCC6
CHEMBL3975715	CS(=O)(=O)c1ccc(nc1)n2nc(C(=O)N)c3CCc4ccc(NC(=O)c5ccccc5Cl)cc4c23
CHEMBL3975756	OC1CN(C1)c2cncc(n2)c3cc4c(cn3)cnn4c5cccc(n5)N6CCNCC6
CHEMBL3975764	CC(C)c1cncc(c1)c2cc3c(cn2)cnn3c4cccc(n4)N5CCCNCC5
CHEMBL3975766	Cn1cc(cn1)c2cc3c(cn2)cnn3c4cccc(n4)N5CC6(CCCCN6)C5
CHEMBL3975787	Cn1cc(cn1)c2cc3c(cn2)cnn3c4cccc(n4)C5(F)CCCNCC5
CHEMBL3976033	CC(C)(O)[C@@H]1CC[C@H](CC1)NC(=O)c2cnc(cc2NC3COC3)n4ncc5cc(cnc45)C#N
CHEMBL3976267	CC1CCC(N)CN1c2cccc(n2)n3ncc4cnc(cc34)c5cncc(C)n5
CHEMBL3976316	Cc1ccc(cc1)c2cc(NC(=O)c3cnn4cc(Br)cnc34)n(n2)c5ccc(C)cn5
CHEMBL3976685	CC(C)Nc1cc(ncc1C(=O)NCCC(C)(C)F)n2ncc3cc(C#N)c(N)nc23
CHEMBL3976760	CCc1cncc(c1)c2cc3c(cn2)cnn3c4cccc(n4)N5CCNCC(O)C5
CHEMBL3977923	CC(C)Nc1cc(ncc1C(=O)NC2CCN(CC2)C(=O)C(C)C)n3ncc4cc(cnc34)C#N
CHEMBL3978447	CC(C)Nc1cc(ncc1C(=O)NC2CCCCC2)n3ncc4cc(C#N)c(N)nc34
CHEMBL3978540	Cc1ccc(nc1)n2nc(cc2NC(=O)c3cnn4cccnc34)C5COCCN5
CHEMBL3979646	CCCCNC(=O)c1cnc(cc1NC2COC2)n3ncc4cc(cnc34)C#N
CHEMBL3980040	C1CN(CCN1)c2cccc(n2)n3ncc4cnc(cc34)c5cncc(c5)C6CC6
CHEMBL3980058	COC(=O)CCNC(=O)c1cnc(cc1NC(C)C)n2ncc3cc(cnc23)C#N
CHEMBL3980111	OCCn1cc(cn1)c2cc3c(cn2)cnn3c4cccc(n4)N5CCCNCC5
CHEMBL3980538	CC(C)(O)[C@H](F)CNC(=O)c1cnc(cc1N[C@H]2CC[C@@H](C2)C(C)(C)O)n3ncc4cc(cnc34)C#N
CHEMBL3980604	CC(C)CCNC(=O)c1cnc(cc1NC2COC2)n3ncc4cc(C#N)c(N)nc34
CHEMBL3981028	COc1ccc(nc1N2CCNCC(O)C2)n3ncc4cnc(cc34)c5cnn(CC(F)(F)F)c5
CHEMBL3981034	C[C@@H](CF)Nc1cc(ncc1C(=O)NC[C@@H](F)C(C)(C)O)n2ncc3cc(cnc23)C#N
CHEMBL3981104	FC(F)n1cc(cn1)c2cc3c(cn2)cnn3c4cccc(n4)N5CCCNCC5
CHEMBL3981196	Cc1ccc(nc1)n2nc(cc2NC(=O)c3cnn4cccnc34)C5CCN(CC5)C6CCC(CC6)NS(=O)(=O)C
CHEMBL3981772	Nc1oc(nn1)c2ccc3[nH]cc(c4cccc(n4)n5cccn5)c3c2
CHEMBL3981915	Cc1cncc(n1)c2cc3c(cn2)cnn3c4cccc(n4)N5CCC6(CCCN6)CC5
CHEMBL3982105	Cc1cncc(n1)c2cc3c(cn2)cnn3c4cccc(n4)N5CCC6(CCNC6)CC5
CHEMBL3982186	CC(C)(O)[C@H](F)CNC(=O)c1cnc(cc1N[C@@H]2C[C@H]2CO)n3ncc4cc(cnc34)C#N
CHEMBL3982539	Cc1cncc(n1)c2cc3c(cn2)cnn3c4ccc(C)c(n4)N5CCC[C@H](N)C5
CHEMBL3983043	CC(C)Nc1cc(ncc1C(=O)N[C@@H]2CC[C@H](CC2)NC(=O)C)n3ncc4cc(C#N)c(N)nc34
CHEMBL3983180	CC(C)Nc1cc(ncc1C(=O)NCCC2(O)CCN(CC2)C3COC3)n4ncc5cc(cnc45)C#N
CHEMBL3983224	Cc1cncc(n1)c2cc3c(cn2)cnn3c4cccc(n4)N5CCCC6(CNC6)C5
CHEMBL3983351	CC#Cc1cncc(n1)c2cc3c(cn2)cnn3c4cccc(n4)N5CCNCC5
CHEMBL3983795	O[C@H]1CCC[C@@H]1Nc2cncc(n2)c3cc4c(cn3)cnn4c5cccc(n5)N6CCNCC6
CHEMBL3984183	C1CNCCN(C1)c2cccc(n2)n3ncc4cnc(cc34)c5cnn(c5)C6CC6
CHEMBL3984232	CN(C)c1cccc(n1)n2ncc3cnc(cc23)c4cncc(C)n4
CHEMBL3984605	CC[C@@H](N[C@@H](C)CC(=O)N)c1ccc(Cl)c(C(=O)c2ccc(nc2)n3cc(CO)cn3)c1F
CHEMBL3984839	FC(F)(F)Cn1cc(cn1)c2cc3c(cn2)cnn3c4cccc(n4)N5CC6(CCCCN6)C5
CHEMBL3985063	CC(C)Nc1cc(ncc1C(=O)NCCC2CC2)n3ncc4cc(C#N)c(N)nc34
CHEMBL3985111	Cc1cc(sn1)c2cc3c(cn2)cnn3c4cccc(n4)N5CCCNCC5
CHEMBL3985113	C(C1COC1)n2cc(cn2)c3cc4c(cn3)cnn4c5cccc(n5)N6CCCNCC6
CHEMBL3985561	CC(C)Nc1cc(ncc1C(=O)N[C@@H]2CC[C@H](CC2)C(C)(C)O)n3ncc4cc(cnc34)C#N
CHEMBL3985571	Cc1ccc(nc1C)n2nc(cc2NC(=O)c3cnn4cccnc34)C5CCN(CC5)S(=O)(=O)C
CHEMBL3985665	C1NCC1Nc2cncc(n2)c3cc4c(cn3)cnn4c5ccccn5
CHEMBL398611	CNC(=O)c1cc(Cl)cc(C)c1NC(=O)c2cc(nn2c3ncccc3Cl)C(F)(F)F
CHEMBL3986159	Cn1cc(cn1)c2cc3c(cn2)cnn3c4cccc(n4)C5CCCNCC5
CHEMBL3986395	CC(C)Nc1cc(ncc1C(=O)NCC(F)(F)C(C)(C)O)n2ncc3cc(cnc23)C#N
CHEMBL3986533	CC(C)Nc1cc(ncc1C(=O)NCCc2ccc(F)cc2)n3ncc4cc(cnc34)C#N
CHEMBL398660	CNC(=O)c1cc(I)cc(C)c1NC(=O)c2cc(Br)nn2c3ncccc3Cl
CHEMBL3986710	COc1cccc(OC)c1C2CC(C)C(=O)N2Cc3cccc(n3)n4cccn4
CHEMBL3986782	CC(C)Nc1cc(ncc1C(=O)NCCC2CCOCC2)n3ncc4cc(cnc34)C#N
CHEMBL398818	CC(C)NC(=O)c1cc(Br)cc(C)c1NC(=O)c2cc(nn2c3ncccc3Cl)C(F)(F)F
CHEMBL398819	CNC(=O)c1cc(Br)cc(C)c1NC(=O)c2cc(Br)nn2c3ncccc3Cl
CHEMBL399318	CNC(=O)c1cc(Cl)cc(C)c1NC(=O)c2cc(Br)nn2c3ncccc3Cl
CHEMBL399523	CC(C)NC(=O)c1cc(Cl)cc(C)c1NC(=O)c2cc(Br)nn2c3ncccc3Cl
CHEMBL399903	CC(C)NC(=O)c1cc(cc(C)c1NC(=O)c2cc(nn2c3ncccc3Cl)C(F)(F)F)C(F)(F)F
CHEMBL400318	CS(=O)(=O)c1ccc(nc1)n2nc(cc2C3CCCCC3)C(F)(F)F
CHEMBL400986	CC(C)NC(=O)c1cc(Cl)cc(C)c1NC(=O)c2cc(OCC(F)(F)F)nn2c3ncccc3Cl
CHEMBL401372	CS(=O)(=O)c1ccc(nc1)n2nc(cc2c3occc3)C(F)(F)F
CHEMBL40265	COc1ccc2c(O[C@@H]3C[C@@H]4N(C3)C(=O)[C@H](CCCCC\C=C/[C@@H]5C[C@]5(NC4=O)C(=O)O)NC(=O)OC(C)(C)C)cc(nc2c1)n6ccc(C)n6
CHEMBL403125	CS(=O)(=O)c1ccc(nc1)n2nc(cc2c3cccnc3)C(F)(F)F
CHEMBL4060104	Cc1cc(ccc1OCc2ccsc2c3cccc(n3)n4ncc(C(=O)O)c4C(F)(F)F)C5CCN(CC5)C(=O)C6CC6
CHEMBL4060171	Cc1nn(c2ccccn2)c3cc(ccc13)c4ccc(cc4)[C@H]5C[C@@H]5C(=O)O
CHEMBL4060517	OC(=O)CCc1ccc(cc1)c2ccc3cnn(c4ccccn4)c3c2
CHEMBL4061042	Cc1cc(ccc1OC2CCc3cccc(c4cccc(n4)n5ncc(C(=O)O)c5C(F)(F)F)c23)C6CCN(CC6)C(=O)C7CC7
CHEMBL4063636	NC(=O)C(=O)C(Cc1ccccc1)NC(=O)c2cccnc2n3ccc(n3)c4ccc(F)cc4
CHEMBL4064209	Cc1csc(c1COc2ccc(cc2C)C3CCN(CC3)C(=O)C4CC4)c5cccc(n5)n6ncc(C(=O)O)c6C(F)(F)F
CHEMBL4065248	CCc1cc(OCC2=C(CCCC2C)c3cccc(n3)n4ncc(C(=O)O)c4C(F)(F)F)ccc1C5CCN(CC5)C(=O)C6CC6
CHEMBL4065429	OC(=O)CCc1ccc(cc1)c2ccc3c(OCc4ccccc4)nn(c5ccccn5)c3c2
CHEMBL4065890	OC(=O)CCc1ccc(cc1)c2ccc3c(nn(c4ccccn4)c3c2)C#N
CHEMBL4066069	Cc1cc(ccc1OCc2ccsc2c3cccc(n3)n4ncc(C(=O)O)c4C(F)(F)F)C5CCN(CC6CC6)CC5
CHEMBL4067197	NC(=O)C(=O)C(Cc1ccccc1)NC(=O)c2cccnc2n3ccc(n3)c4ccc(Cl)cc4
CHEMBL4067225	NC(=O)C(=O)[C@@H](Cc1ccccc1)NC(=O)c2cccnc2n3ccc(n3)c4ccccc4
CHEMBL4068214	CCCCC(NC(=O)c1cccnc1n2cc(cn2)c3ccccc3)C(=O)C(=O)N
CHEMBL4068692	Cc1cc(ccc1NC2CCc3cccc(c4cccc(n4)n5ncc(C(=O)O)c5C)c23)C6CCN(CC6)C(=O)C7CC7
CHEMBL4068825	OC(=O)CCc1ccc(cc1)c2cc(C#N)c3cnn(c4ccccn4)c3c2
CHEMBL4069670	COc1cnc(c2[nH]cc(C(=O)C(=O)N3CCN(CC3)C(=O)c4ccccc4)c12)n5ccc(C)n5
CHEMBL4069925	CCc1cc(OCC2=C(CCCC2C)c3cccc(n3)n4ncc(C(=O)O)c4C)ccc1C5CCN(CC5)C(=O)C6CC6
CHEMBL4070273	COc1cc(CCC(=O)O)ccc1c2ccc3c(C)nn(c4ccccn4)c3c2
CHEMBL4070359	Cc1ccc(nc1)n2nc(C)c3cnc(cc23)c4ccc(cc4F)[C@H]5C[C@@H]5C(=O)O
CHEMBL4071228	Cc1nn(c2ccccn2)c3cc(ccc13)c4cccc(CCC(=O)O)c4
CHEMBL4071523	CC(CC(=O)O)c1ccc(cc1)c2cc3c(cn2)c(C)nn3c4ccccn4
CHEMBL4072233	NC(=O)C(=O)C(Cc1ccccc1)NC(=O)c2cccnc2n3cc4ccccc4n3
CHEMBL4072431	Cc1cc(ccc1NC2CCc3cccc(c4cccc(n4)n5ncc(C(=O)O)c5C(F)(F)F)c23)C6CCN(CC6)C(=O)C7CC7
CHEMBL4072803	CCc1cc(COc2ccc(cc2C)C3CCN(CC3)C(=O)C4CC4)c(s1)c5cccc(n5)n6ncc(C(=O)O)c6C(F)(F)F
CHEMBL4073154	NC(=O)C(=O)C(Cc1ccccc1)NC(=O)c2cccnc2n3ccc(n3)c4ccc(CN5CCOCC5)cc4
CHEMBL4073616	NC(=O)C(=O)C(Cc1ccccc1)NC(=O)c2cccnc2n3ccc(n3)C4CCCCC4
CHEMBL4073863	Cc1cc(ccc1OCC2=C(CCCC2)c3cccc(n3)n4ncc(C(=O)O)c4C(F)(F)F)C5CCN(CC5)C(=O)C6CC6
CHEMBL4075162	Cc1nn(c2ccccn2)c3cc(ccc13)c4ccc(CCC(=O)O)cc4F
CHEMBL4075477	NC(=O)C(=O)C(Cc1ccccc1)NC(=O)c2cccnc2n3ccc(Cc4ccccc4)n3
CHEMBL4075889	COc1ccc(cc1)c2ccn(n2)c3ncccc3C(=O)NC(Cc4ccccc4)C(=O)C(=O)N
CHEMBL4076004	CCc1nn(c2ccccn2)c3cc(ccc13)c4ccc(CCC(=O)O)cc4
CHEMBL4076190	Cc1nn(c2ccccn2)c3cc(ccc13)c4ccc(CCCC(=O)O)cc4
CHEMBL4076710	COc1cc(C=O)c(OCc2cccnc2n3cccn3)cn1
CHEMBL4076913	Cc1cncc(n1)c2cc3c(cn2)cnn3c4cccc(n4)[C@H]5CNCCC5(F)F
CHEMBL4077353	Cc1nn(c2ccccn2)c3cc(ccc13)c4ccc(CCC(=O)O)cc4C#N
CHEMBL4077491	Cc1cc(C)n(n1)c2ccc(cn2)C(=N)N
CHEMBL4077507	Cc1nn(c2ccccn2)c3cc(ccc13)c4ccc(CCC(=O)O)cc4
CHEMBL4077634	NC(=O)C(=O)C(Cc1ccccc1)NC(=O)c2cccnc2n3cc(cn3)c4ccccc4
CHEMBL4078374	Cc1nn(c2ccccn2)c3cc(ccc13)c4ccc(CC(C)(C)C(=O)O)cc4
CHEMBL4078672	Cc1nn(c2ccccn2)c3cc(ccc13)c4ccc(cc4)[C@@H]5C[C@H]5C(=O)O
CHEMBL4079423	COc1ccc2CN(C[C@]3(NC(=O)NC3=O)c4oc5ccc(nc5c4)n6cccn6)C(=O)c2c1
CHEMBL4079567	CCC(=O)N1CCC(CC1)c2ccc(OCc3ccsc3c4cccc(n4)n5ncc(C(=O)O)c5C(F)(F)F)cc2
CHEMBL4079621	C[C@H](Cc1ccc(cc1)c2ccc3cnn(c4ccccn4)c3c2)C(=O)O
CHEMBL4080204	NC(=O)C(=O)C(Cc1ccccc1)NC(=O)c2cccnc2n3ccc(n3)c4ccc(cc4)C(F)(F)F
CHEMBL4080423	Cc1cc2CCC(Nc3ccc(cc3C)C4CCN(CC4)C(=O)C5CC5)c2c(c1)c6cccc(n6)n7ncc(C(=O)O)c7C(F)(F)F
CHEMBL4080843	NC(=O)C(=O)C(Cc1ccccc1)NC(=O)c2cccnc2n3ccc(n3)C4CCOCC4
CHEMBL4080998	COc1nn(c2ccccn2)c3cc(cc(F)c13)c4ccc(cc4)[C@H]5C[C@@H]5C(=O)O
CHEMBL4082057	Cc1nn(c2ccccn2)c3cc(ccc13)c4ccc(cc4)[C@H]5C[C@H]5C(=O)O
CHEMBL408225	CNC(=O)c1cc(Cl)cc(Cl)c1NC(=O)c2cc(nn2c3ncccc3F)C(F)(F)F
CHEMBL4082670	NC(=N)c1ccc(nc1)n2cccn2
CHEMBL4082804	Cc1nn(c2ccccn2)c3cc(ccc13)c4ccc(CC(=O)O)cc4
CHEMBL4084195	CCc1csc(c1COc2ccc(cc2C)C3CCN(CC3)C(=O)C4CC4)c5cccc(n5)n6ncc(C(=O)O)c6C(F)(F)F
CHEMBL4085695	Cc1nn(c2ccccn2)c3cc(ncc13)c4ccc(CCC(=O)O)cc4
CHEMBL4086689	CCc1cc(OCC2=C(CCCC2(C)C)c3cccc(n3)n4ncc(C(=O)O)c4C(F)(F)F)ccc1C5CCN(CC5)C(=O)C6CC6
CHEMBL4087308	Cc1cc(cc2c1cnn2c3ccccn3)c4ccc(CCC(=O)O)cc4
CHEMBL4087310	NC(=O)C(O)C(Cc1ccccc1)NC(=O)c2cccnc2n3ccc(n3)c4ccc(F)cc4
CHEMBL4087448	Cc1cc(ccc1OCc2ccsc2c3cccc(n3)n4ncc(C(=O)O)c4C(F)(F)F)C5CCNCC5
CHEMBL4087992	COc1nn(c2ccccn2)c3cc(ccc13)c4ccc(CCC(=O)O)cc4
CHEMBL4088345	Cc1cc(COc2ccc(cc2C)C3CCN(CC3)C(=O)C4CC4)c(s1)c5cccc(n5)n6ncc(C(=O)O)c6C(F)(F)F
CHEMBL4089174	COc1cnc(c2[nH]cc(C(=O)C(=O)N3CCN(CC3)C(=O)c4ccccc4)c12)n5cc(C)cn5
CHEMBL4089586	Cc1cncc(n1)c2cnc3cnn(c4cccc(n4)N5CCCNCC5)c3c2
CHEMBL4089919	OC(=O)CCc1ccc(cc1)c2cc(F)c3cnn(c4ccccn4)c3c2
CHEMBL4090719	Cc1cc(ccc1OC2CCc3cccc(c4cccc(n4)n5cc(cn5)C(=O)O)c23)C6CCN(CC6)C(=O)C7CC7
CHEMBL4091687	Cc1cncc(n1)c2cc3c(cnn3c4cccc(n4)N5CCCNCC5)nn2
CHEMBL4091952	CCc1c(C)sc(c1COc2ccc(cc2C)C3CCN(CC3)C(=O)C4CC4)c5cccc(n5)n6ncc(C(=O)O)c6C(F)(F)F
CHEMBL409246	CNC(=O)c1cc(Cl)cc(F)c1NC(=O)c2cc(Br)nn2c3ncccc3Cl
CHEMBL4092996	NC(=O)C(=O)C(Cc1ccccc1)NC(=O)c2cccnc2n3cc4COc5ccccc5c4n3
CHEMBL4094243	CC(C)(C)c1ccn(n1)c2ncccc2C(=O)NC(Cc3ccccc3)C(=O)C(=O)N
CHEMBL409444	CNC(=O)c1cc(Cl)cc(C)c1NC(=O)c2cc(Br)nn2c3ncccc3F
CHEMBL4094544	CCN(CC)Cc1ccc(cc1)c2ccn(n2)c3ncccc3C(=O)NC(Cc4ccccc4)C(=O)C(=O)N
CHEMBL4094671	NC(=O)C(=O)[C@H](Cc1ccccc1)NC(=O)c2cccnc2n3ccc(n3)c4ccccc4
CHEMBL4094839	CCCCC(NC(=O)c1cccnc1n2ccc(n2)c3ccccc3)C(=O)C(=O)N
CHEMBL4095528	NC(=O)C(=O)C(Cc1ccccc1)NC(=O)c2cccnc2n3ccc(n3)c4ccccc4
CHEMBL4095627	NC(=O)C(=O)C(Cc1ccccc1)NC(=O)c2cccnc2n3cc4CCCCc4n3
CHEMBL4095970	N#Cc1cnn(c1)c2cccc3ncnn23
CHEMBL409641	CNC(=O)c1cc(F)cc(C)c1NC(=O)c2cc(Br)nn2c3ncccc3Cl
CHEMBL4097308	Cc1cncc(n1)c2ccc3cnn(c4cccc(n4)N5CCCNCC5)c3c2
CHEMBL4097537	COc1nn(c2ccccn2)c3cc(ccc13)c4ccc(cc4)[C@H]5C[C@@H]5C(=O)O
CHEMBL4097587	CN1CCC(CC1)c2ccn(n2)c3ncccc3C(=O)NC(Cc4ccccc4)C(=O)C(=O)N
CHEMBL4097652	C[C@@H](Cc1ccc(cc1)c2ccc3cnn(c4ccccn4)c3c2)C(=O)O
CHEMBL4099200	NC(=O)C(=O)C(Cc1ccccc1)NC(=O)c2cccnc2n3cccn3
CHEMBL4099694	Cc1cc(ccc1OCc2cc(Cl)sc2c3cccc(n3)n4ncc(C(=O)O)c4C(F)(F)F)C5CCN(CC5)C(=O)C6CC6
CHEMBL4099731	Cc1cncc(n1)c2cc(F)c3cnn(c4cccc(n4)N5CCCNCC5)c3c2
CHEMBL4101071	Cc1nn(c2ccccn2)c3cc(ccc13)c4ccc(CCC(=O)O)cc4Cl
CHEMBL4102166	Cc1cc(ccc1OCC2=C(CCC2)c3cccc(n3)n4ncc(C(=O)O)c4C(F)(F)F)C5CCN(CC5)C(=O)C6CC6
CHEMBL4103624	Cc1nn(c2ccccn2)c3cc(ccc13)c4cccc(CC(=O)O)c4
CHEMBL4103827	CCC(=O)N1CCC(CC1)c2ccc(OCc3ccsc3c4cccc(n4)n5ncc(C(=O)O)c5C(F)(F)F)c(C)c2
CHEMBL4104332	NC(=O)C(=O)C(Cc1ccccc1)NC(=O)c2cccnc2n3ccc(n3)C4CC4
CHEMBL4104445	NC(=O)C(=O)C(Cc1ccccc1)NC(=O)c2cccnc2n3ccc(n3)c4cccc(c4)C(F)(F)F
CHEMBL4106523	CC(C)(O)[C@H](F)CNC(=O)c1cnc(cc1NC2CN(C2)c3ncc(F)cn3)n4ncc5cc(cnc45)C#N
CHEMBL4106584	N[C@@H]1CCCN(C1)c2cccc(n2)n3ncc4cnc(cc34)c5cncs5
CHEMBL4106606	CC(C)Nc1cc(ncc1C(=O)NC[C@@H](F)C(C)(C)O)n2ncc3cc(Br)cnc23
CHEMBL4106712	CC(C)(O)[C@H](F)CNC(=O)c1cnc(cc1NC2COCC2(F)F)n3ncc4cc(cnc34)C#N
CHEMBL4106715	CCn1cc(Nc2cc(ncc2C(=O)NC[C@@H](F)C(C)(C)O)n3ncc4cc(cnc34)C#N)cn1
CHEMBL4106743	CC(C)(O)[C@H](F)CNC(=O)c1cnc(cc1Nc2cnn(CC(F)F)c2)n3ncc4cc(Cl)cnc34
CHEMBL4106804	CC(C)(C)Nc1cc(ncc1C(=O)NC[C@@H](F)C(C)(C)O)n2ncc3cc(C#N)c(N)nc23
CHEMBL4106807	CCn1cc(cn1)c2cc3c(cn2)cnn3c4cccc(n4)N5CC[C@@H](O)C5
CHEMBL4106902	CCOC(=O)N1CC(C1)Nc2cc(ncc2C(=O)NC[C@@H](F)C(C)(C)O)n3ncc4cc(cnc34)C#N
CHEMBL4106933	CC(C)Nc1cc(ncc1C(=O)NC[C@@H](F)C(C)(C)O)n2ccc(n2)c3ccnnc3
CHEMBL4106938	CC(C)Nc1cc(ncc1C(=O)NC[C@@H](F)C(C)(C)O)n2ncc3cnc(N)nc23
CHEMBL4106997	CC(C)(O)[C@H](F)CNC(=O)c1cnc(cc1N[C@@H]2CCN(C2)C(=O)c3ccc(F)cc3F)n4ncc5cc(cnc45)C#N
CHEMBL4107049	CC(O)CCNc1cc(ncc1C(=O)NC[C@@H](F)C(C)(C)O)n2ncc3cc(cnc23)C#N
CHEMBL4107060	CC(C)(O)[C@H](F)CNC(=O)c1cnc(cc1NCCNC(=O)OC(C)(C)C(F)(F)F)n2ncc3cc(cnc23)C#N
CHEMBL4107087	CC(C)(O)[C@H](F)CNC(=O)c1cnc(cc1Nc2cnn(c2)C3COC3)n4ncc5cc(cnc45)C#N
CHEMBL4107090	CC(C)(O)[C@H](F)CNC(=O)c1cnc(cc1NC2CN(C2)c3ncc(Cl)cn3)n4ncc5cc(cnc45)C#N
CHEMBL4107092	Cc1cncc(n1)c2cc3c(cn2)cnn3c4cccc(n4)N5CCC[C@@H](O)C5
CHEMBL4107103	CC(C)(O)[C@H](F)CNC(=O)c1cnc(cc1Nc2ccc(cc2)n3cncn3)n4ncc5cc(cnc45)C#N
CHEMBL4107116	CCCNc1cc(ncc1C(=O)NC[C@@H](F)C(C)(C)O)n2ncc3cc(C#N)c(N)nc23
CHEMBL4107169	CC(C)(O)[C@H](F)CNC(=O)c1cnc(cc1NC2CC2)n3ncc4cc(Cl)cnc34
CHEMBL4107218	C[C@@H](N)c1ccc(nc1)n2nc(cc2NC(=O)c3cnn4cccnc34)C5CCN(CC5)S(=O)(=O)C
CHEMBL4107224	CC(Nc1cc(ncc1C(=O)NC[C@@H](F)C(C)(C)O)n2ncc3cc(cnc23)C#N)C(F)(F)F
CHEMBL4107281	CC[C@@H](C)Nc1cc(ncc1C(=O)NCCC(C)(C)O)n2ncc3cc(cnc23)C#N
CHEMBL4107330	COC(C)(C)CNc1cc(ncc1C(=O)NC[C@@H](F)C(C)(C)O)n2ncc3cc(cnc23)C#N
CHEMBL4107384	CC(C)[C@@H](CO)Nc1cc(ncc1C(=O)NC[C@@H](F)C(C)(C)O)n2ncc3cc(cnc23)C#N
CHEMBL4107389	CC(C)(O)[C@H](F)CNC(=O)c1cnc(cc1N[C@@H]2CC[C@H](CC2)NC(=O)C(F)F)n3ncc4cc(cnc34)C#N
CHEMBL4107426	CC(Nc1cc(ncc1C(=O)NC[C@@H](F)C(C)(C)O)n2ncc3cc(C#N)c(N)nc23)C(F)(F)F
CHEMBL4107447	CC(C)(C)Nc1cc(ncc1C(=O)NC[C@@H](F)C(C)(C)O)n2ncc3cc(cnc23)C#N
CHEMBL4107504	CCOC(=O)c1cnn(c1)c2ccc(cn2)C(=O)c3c(Cl)ccc([C@H](N)CC)c3F
CHEMBL4107529	COCCn1cc(Nc2cc(ncc2C(=O)NC[C@@H](F)C(C)(C)O)n3ncc4cc(Cl)cnc34)cn1
CHEMBL4107570	Cc1nnc(s1)c2ccc(Nc3cc(ncc3C(=O)NC[C@@H](F)C(C)(C)O)n4ncc5cc(cnc45)C#N)cc2
CHEMBL4107578	CC(C)(O)[C@H](F)CNC(=O)c1cnc(cc1NC2CCOCC2)n3ncc4cc(Cl)cnc34
CHEMBL4107607	CC(C)(O)[C@H](F)CNC(=O)c1cnc(cc1NCC(C)(F)CO)n2ncc3cc(cnc23)C#N
CHEMBL4107673	CC(C)(O)[C@H](F)CNC(=O)c1cnc(cc1NC2CC2)n3ncc4cncnc34
CHEMBL4107677	CC(C)c1cc(Nc2cc(ncc2C(=O)NC[C@@H](F)C(C)(C)O)n3ncc4cc(cnc34)C#N)[nH]n1
CHEMBL4107792	CC(C)(O)[C@H](F)CNC(=O)c1cnc(cc1Nc2cnn(c2)c3ncccn3)n4ncc5cc(cnc45)C#N
CHEMBL4107902	C[C@H](CF)Nc1cc(ncc1C(=O)NC[C@@H](F)C(C)(C)O)n2ncc3cc(cnc23)C#N
CHEMBL4107905	COc1cnc2c(cnn2c3cc(NC(C)C)c(cn3)C(=O)NC[C@@H](F)C(C)(C)O)c1
CHEMBL4107994	CC(C)(O)[C@H](F)CNC(=O)c1cnc(cc1Nc2ccn(CC(F)(F)F)n2)n3ncc4cc(cnc34)C#N
CHEMBL4108001	CC(C)(O)[C@H](F)CNC(=O)c1cnc(cc1Nc2cnn(c2)C3CCOCC3)n4ncc5cc(Cl)cnc45
CHEMBL4108028	C[C@@H](F)CNc1cc(ncc1C(=O)NC[C@@H](F)C(C)(C)O)n2ncc3cc(cnc23)C#N
CHEMBL4108032	CC(C)Nc1cc(ncc1C(=O)N[C@@H]2CC[C@H](CC2)NC(=O)[C@@H](C)O)n3ncc4cc(cnc34)C#N
CHEMBL4108172	Cn1cc(cn1)c2ccc(Nc3cc(ncc3C(=O)NC[C@@H](F)C(C)(C)O)n4ncc5cc(cnc45)C#N)cc2
CHEMBL4108191	CC(C)Nc1cc(ncc1C(=O)N[C@@H]2CC[C@H](OC2)C(C)(C)O)n3ncc4cc(cnc34)C#N
CHEMBL4108248	CC(C)(O)[C@H](F)CNC(=O)c1cnc(cc1N[C@@H]2CCN(C2)c3ncc(F)cn3)n4ncc5cc(cnc45)C#N
CHEMBL4108324	CC(C)(O)[C@H](F)CNC(=O)c1cnc(cc1NCCCF)n2ncc3cc(cnc23)C#N
CHEMBL4108464	CC(C)(O)[C@H](F)CNC(=O)c1cnc(cc1Nc2cnn(CCCF)c2)n3ncc4cc(cnc34)C#N
CHEMBL4108474	CC(C)(O)[C@H](F)CNC(=O)c1cnc(cc1NC23CC(C2)C3)n4ncc5cc(C#N)c(N)nc45
CHEMBL4108507	CCNc1cc(ncc1C(=O)NC[C@@H](F)C(C)(C)O)n2ncc3cnc(N)nc23
CHEMBL4108523	CC(C)(O)[C@H](F)CNC(=O)c1cnc(cc1N[C@@H]2CCN(C2)c3ncccn3)n4ncc5cc(cnc45)C#N
CHEMBL4108546	CC(C)NC(=O)[C@@H]1CC[C@H](CC1)Nc2cc(ncc2C(=O)NC[C@@H](F)C(C)(C)O)n3ncc4cc(cnc34)C#N
CHEMBL4108625	CC(C)Nc1cc(ncc1C(=O)NC[C@@H](C)F)n2ncc3cc(C#N)c(N)nc23
CHEMBL4108659	CC(C)(O)[C@H](F)CNC(=O)c1cnc(cc1NC2CCC(F)(F)C2)n3ncc4cc(cnc34)C#N
CHEMBL4108684	CC(C)(O)[C@H](F)CNC(=O)c1cnc(cc1Nc2cccc(C#N)c2F)n3ncc4cc(cnc34)C#N
CHEMBL4108811	CC(C)Nc1cc(ncc1C(=O)NC[C@@H](F)C(C)(C)O)n2ncc3cncnc23
CHEMBL4108814	CC(C)(F)[C@H](F)CNC(=O)c1cnc(cc1Nc2cnn(c2)C(F)F)n3ncc4cc(Cl)cnc34
CHEMBL4108818	CC(C)(O)[C@H](F)CNC(=O)c1cnc(cc1NC2CCN(CC2)c3ncc(F)cn3)n4ncc5cc(cnc45)C#N
CHEMBL4108900	Cn1nnnc1c2ccc(Nc3cc(ncc3C(=O)NC[C@@H](F)C(C)(C)O)n4ncc5cc(cnc45)C#N)cc2
CHEMBL4108910	CCOC(C)(C)[C@H](F)CNC(=O)c1cnc(cc1NC(C)C)n2ncc3cc(cnc23)C#N
CHEMBL4108994	CC(C)(O)[C@H](F)CNC(=O)c1cnc(cc1NCC(F)(F)F)n2ncc3cc(cnc23)C#N
CHEMBL4109039	CC(C)Oc1ccc(cc1)c2cc(O[C@@H]3C[C@@H]4N(C3)C(=O)[C@@H](NC(=O)OC(C)(C)C(F)(F)F)[C@H](C)C[C@H](C)CC\C=C/[C@@H]5C[C@]5(NC4=O)C(=O)NS(=O)(=O)C6(C)CC6)cc(n2)n7cccn7
CHEMBL4109069	CC(C)(O)[C@H](F)CNC(=O)c1cnc(cc1Nc2cnn(c2)c3ncc(F)cn3)n4ncc5cc(cnc45)C#N
CHEMBL4109108	Cc1cc(Nc2cc(ncc2C(=O)NC[C@@H](F)C(C)(C)O)n3ncc4cc(cnc34)C#N)n(C)n1
CHEMBL4109109	CC(C)Nc1cc(ncc1C(=O)NC[C@@H](F)C(C)(C)OC(F)F)n2ncc3cc(cnc23)C#N
CHEMBL4109113	CCCn1cc(Nc2cc(ncc2C(=O)NC[C@@H](F)C(C)(C)O)n3ncc4cc(Cl)cnc34)cn1
CHEMBL4109117	Cc1cncc(n1)c2cc3c(cn2)cnn3c4cccc(n4)C(=O)N5CCC[C@@H](N)C5
CHEMBL4109155	COC(=O)N1CC(C1)Nc2cc(ncc2C(=O)NC[C@@H](F)C(C)(C)O)n3ncc4cc(cnc34)C#N
CHEMBL4109233	CC(C)Nc1cc(ncc1C(=O)NC[C@@H](F)C(C)(C)O)n2ncc3cc(C#N)c(N)nc23
CHEMBL4109253	CC(C)n1cc(Nc2cc(ncc2C(=O)NC[C@@H](F)C(C)(C)O)n3ncc4cc(Cl)cnc34)cn1
CHEMBL4109280	CC(C)(O)[C@H](F)CNC(=O)c1cnc(cc1Nc2cnn(CCC#N)c2)n3ncc4cc(Cl)cnc34
CHEMBL4109386	C[C@@H]1CCC(C1)N2CCC(CC2)c3cc(NC(=O)c4cnn5cccnc45)n(n3)c6ccc(C)cn6
CHEMBL4109402	CC(C)(O)[C@H](F)CNC(=O)c1cnc(cc1NC2CCC(F)CC2)n3ncc4cc(cnc34)C#N
CHEMBL4109434	CC(C)(O)[C@H](F)CNC(=O)c1cnc(cc1Nc2cnn(CC(F)(F)F)c2)n3ncc4cc(cnc34)C#N
CHEMBL4109623	CC(C)Nc1cc(ncc1C(=O)NC[C@@H](F)C(C)(C)O)n2ncc3cc(Cl)cnc23
CHEMBL4109670	CC(F)CCNc1cc(ncc1C(=O)NC[C@@H](F)C(C)(C)O)n2ncc3cc(cnc23)C#N
CHEMBL4109694	CC(C)(O)[C@H](F)CNC(=O)c1cnc(cc1NCCOC(F)F)n2ncc3cc(cnc23)C#N
CHEMBL4109699	Cc1ccc(nc1N2CCNC[C@@H](O)C2)n3ncc4cnc(cc34)c5cnn(CC(F)(F)F)c5
CHEMBL4109707	CC(C)(O)[C@H](F)CNC(=O)c1cnc(cc1NC2CCC(N)C2)n3ncc4cc(cnc34)C#N
CHEMBL4109739	CC(C)Nc1cc(ncc1C(=O)NC[C@@H](F)C(C)(C)F)n2ncc3cc(C#N)c(N)nc23
CHEMBL4109920	CC(C)(O)[C@H](F)CNC(=O)c1cnc(cc1Nc2cnn(CC(F)F)c2)n3ncc4cc(F)cnc34
CHEMBL4109952	CC(C)(F)Cn1cc(Nc2cc(ncc2C(=O)NC[C@@H](F)C(C)(C)O)n3ncc4cc(cnc34)C#N)cn1
CHEMBL4109970	C[C@@]1(O)CNCCN(C1)c2cccc(n2)n3ncc4cnc(cc34)c5cnn(CC(F)(F)F)c5
CHEMBL4109992	CC(C)Nc1cc(ncc1C(=O)NC[C@@H](F)C(C)(C)O)n2ncc3cnc(NC[C@@H](F)C(C)(C)O)nc23
CHEMBL4109995	CCNc1cc(ncc1C(=O)NC[C@@H](F)C(C)(C)O)n2ncc3cc(cnc23)C#N
CHEMBL4110079	CC(C)(CO)Nc1cc(ncc1C(=O)NC[C@@H](F)C(C)(C)O)n2ncc3cc(cnc23)C#N
CHEMBL4110124	CC(C)(O)[C@H](F)CNC(=O)c1cnc(cc1NC23CC4CC(CC(O)(C4)C2)C3)n5ncc6cc(cnc56)C#N
CHEMBL4110155	CNC(=O)[C@H](F)CNC(=O)c1cnc(cc1NC(C)C)n2ncc3cc(cnc23)C#N
CHEMBL4110170	CC(C)(O)[C@H](F)CNC(=O)c1cnc(cc1NC2CCOCC2)n3ncc4cc(F)cnc34
CHEMBL4110171	CC(C)(O)[C@H](F)CNC(=O)c1cnc(cc1Nc2cnn(c2)C3CCOCC3)n4ncc5cc(cnc45)C#N
CHEMBL4110202	CC[C@@H](N)c1ccc(Cl)c(C(=O)c2ccc(nc2)n3cccn3)c1F
CHEMBL4110250	CC(C)(O)[C@H](F)CNC(=O)c1cnc(cc1NC2CC2)n3ncc4cc(cnc34)C#N
CHEMBL4110283	CC(C)(O)[C@H](F)CNC(=O)c1cnc(cc1NC2CCCOC2)n3ncc4cc(F)cnc34
CHEMBL4110326	CC(C)c1cncc(c1)c2cc3c(cn2)cnn3c4cccc(n4)N5CCC[C@@H](N)C5
CHEMBL4110363	CC[C@@H]1CN(CCN1)c2cccc(n2)n3ncc4cnc(cc34)c5cnn(CC)c5
CHEMBL4110422	CC(C)(O)[C@H](F)CNC(=O)c1cnc(cc1Nc2ccn(CC(F)F)n2)n3ncc4cc(cnc34)C#N
CHEMBL4110545	CCn1cc(Nc2cc(ncc2C(=O)NC[C@@H](F)C(C)(C)O)n3ncc4cc(Cl)cnc34)cn1
CHEMBL4110605	CC(C)(O)[C@H](F)CNC(=O)c1cnc(cc1Nc2ccc3ncoc3c2)n4ncc5cc(cnc45)C(=O)N
CHEMBL4110610	CC(C)(F)CCNc1cc(ncc1C(=O)NC[C@@H](F)C(C)(C)O)n2ncc3cc(cnc23)C#N
CHEMBL4110619	CCNc1cc(ncc1C(=O)NC[C@@H](F)C(C)(C)O)n2ncc3cc(C#N)c(N)nc23
CHEMBL4110731	CCn1cc(cn1)c2cc3c(cn2)cnn3c4cccc(n4)N5CC[C@@H](N)C5
CHEMBL4110746	CC(C)(O)[C@H](F)CNC(=O)c1cnc(cc1NC2CC2)n3ncc4cc(C#N)c(N)nc34
CHEMBL4110754	CC(C)Nc1cc(ncc1C(=O)NC[C@@H](F)C(=O)N2CCOCC2)n3ncc4cc(cnc34)C#N
CHEMBL4110810	COC(C)(C)[C@H](F)CNC(=O)c1cnc(cc1NC(C)C)n2ncc3cc(cnc23)C#N
CHEMBL4110840	CC(C)(O)[C@H](F)CNC(=O)c1cnc(cc1NC2CCC(F)C2)n3ncc4cc(cnc34)C#N
CHEMBL4110998	CC(C)Nc1cc(ncc1C(=O)NC[C@@H](F)C(C)(C)OP(=O)(O)O)n2ncc3cc(cnc23)C#N
CHEMBL4111012	CC(C)Nc1cc(ncc1C(=O)NC[C@@H](F)C(C)(C)O)n2ncc3cc(O)cnc23
CHEMBL411103	CNC(=O)c1cc(F)cc(C)c1NC(=O)c2cc(nn2c3ncccc3Cl)C(F)(F)F
CHEMBL4111056	CC(C)(O)[C@H](F)CNC(=O)c1cnc(cc1N[C@@H]2CCOC2)n3ncc4cc(cnc34)C#N
CHEMBL4111058	CC(C)(O)[C@H](F)CNC(=O)c1cnc(cc1NC23CCC(O)(CC2)C3)n4ncc5cc(cnc45)C#N
CHEMBL4111088	CC(C)(O)[C@H](F)CNC(=O)c1cnc(cc1NC2(C)CC2)n3ncc4cc(cnc34)C#N
CHEMBL4111152	CC(C)Nc1cc(ncc1C(=O)NC[C@@H](F)C(C)(C)F)n2ncc3cc(cnc23)C#N
CHEMBL4111216	CC(C)C(O)CNc1cc(ncc1C(=O)NC[C@@H](F)C(C)(C)O)n2ncc3cc(cnc23)C#N
CHEMBL4111235	CC(C)(O)[C@H](F)CNC(=O)c1cnc(cc1Nc2ncc(s2)C(C)(C)O)n3ncc4cc(cnc34)C#N
CHEMBL4111238	CC(C)Nc1cc(ncc1C(=O)N[C@@H]2CCCN(C2)S(=O)(=O)C)n3ncc4cc(cnc34)C#N
CHEMBL4111280	CC(C)(O)[C@H](F)CNC(=O)c1cnc(cc1Nc2cnn(CC(F)F)c2)n3ncc4cc(cnc34)C#N
CHEMBL4111375	CC(C)(O)[C@H](F)CNC(=O)c1cnc(cc1NC2COC2)n3ncc4cc(F)cnc34
CHEMBL4111423	Cc1cncc(n1)c2cc3c(cn2)cnn3c4cccc(n4)N5CC[C@@H](N)C5
CHEMBL4111430	CC(C)NC(=O)[C@H](F)CNC(=O)c1cnc(cc1NC(C)C)n2ncc3cc(cnc23)C#N
CHEMBL4111435	CC(C)Nc1cc(ncc1C(=O)NC[C@@H](F)C(C)(C)O)n2ncc3cc(F)cnc23
CHEMBL4111498	CC(C)(O)[C@H](F)CNC(=O)c1cnc(cc1Nc2cnn(CCCF)c2)n3ncc4cc(Cl)cnc34
CHEMBL4111561	Cn1cc(Nc2cc(ncc2C(=O)NC[C@@H](F)C(C)(C)O)n3ncc4cc(cnc34)C#N)cn1
CHEMBL4111578	CC(C)(O)[C@H](F)CNC(=O)c1cnc(cc1Nc2ccc(cc2)C#N)n3ncc4cc(cnc34)C#N
CHEMBL4111593	CC(C)Nc1cc(ncc1C(=O)NC[C@@H](F)C(C)C)n2ncc3cc(cnc23)C#N
CHEMBL4111637	CCc1cncc(c1)c2cc3c(cn2)cnn3c4cccc(n4)N5CCNC[C@@H](O)C5
CHEMBL4111673	Cn1nccc1Nc2cc(ncc2C(=O)NC[C@@H](F)C(C)(C)O)n3ncc4cc(cnc34)C#N
CHEMBL4111778	CC(C)Nc1cc(ncc1C(=O)NC[C@@H](F)C(C)(C)F)n2ncc3cc(Cl)cnc23
CHEMBL4111866	CC(CCF)Nc1cc(ncc1C(=O)NC[C@@H](F)C(C)(C)O)n2ncc3cc(cnc23)C#N
CHEMBL4111872	CC(C)(O)[C@H](F)CNC(=O)c1cnc(cc1NC23CC(C2)C3)n4ncc5cc(cnc45)C#N
CHEMBL4111880	CC(C)Nc1cc(ncc1C(=O)N[C@H](C)C2CC2)n3ncc4cc(C#N)c(N)nc34
CHEMBL4111939	CC(C)(O)[C@H](F)CNC(=O)c1cnc(cc1NCCC(F)(F)F)n2ncc3cc(cnc23)C#N
CHEMBL4111974	CC(C)(O)[C@H](F)CNC(=O)c1cnc(cc1Nc2cnn(CCC#N)c2)n3ncc4cc(cnc34)C#N
CHEMBL4112023	CCCNc1cc(ncc1C(=O)NC[C@@H](F)C(C)(C)O)n2ncc3cc(cnc23)C#N
CHEMBL4112067	CC(C)Nc1cc(ncc1C(=O)NC[C@@H](F)C(C)(C)O)n2ncc3cc(cnc23)C(F)F
CHEMBL4112120	CC(C)(O)[C@H](F)CNC(=O)c1cnc(cc1NCCNS(=O)(=O)C)n2ncc3cc(cnc23)C#N
CHEMBL4112161	CC(C)Nc1cc(ncc1C(=O)NC[C@@H](F)C(C)(C)O)n2ncc3cc(C)cnc23
CHEMBL4112186	CC[C@@H](N[C@H](C)CC(=O)N)c1ccc(Cl)c(C(=O)c2ccc(nc2)n3cc(CO)cn3)c1F
CHEMBL4112231	CC(C)(O)[C@H](F)CNC(=O)c1cnc(cc1NCC(F)F)n2ncc3cc(cnc23)C#N
CHEMBL4112293	CC(C)(O)[C@H](F)CNC(=O)c1cnc(cc1N[C@@H]2CC[C@H](CC2)C(C)(C)O)n3ncc4cc(cnc34)C#N
CHEMBL4112374	CC(C)(C)Cn1cc(Nc2cc(ncc2C(=O)NC[C@@H](F)C(C)(C)O)n3ncc4cc(cnc34)C#N)cn1
CHEMBL4112384	CC(C)(O)[C@H](F)CNC(=O)c1cnc(cc1Nc2cc(n[nH]2)C3CC3)n4ncc5cc(cnc45)C#N
CHEMBL4112418	CC(C)(F)CCNc1cc(ncc1C(=O)NC[C@@H](F)C(C)(C)O)n2ncc3cc(C#N)c(N)nc23
CHEMBL4112444	CNC(=O)[C@@H]1CC[C@H](CC1)NC(=O)c2cnc(cc2N[C@@H]3CCCC[C@H]3F)n4ncc5cc(C#N)c(N)nc45
CHEMBL4112464	CC[C@@H](F)CNc1cc(ncc1C(=O)NC[C@@H](F)C(C)(C)O)n2ncc3cc(Cl)cnc23
CHEMBL4112547	CC(C)Nc1cc(ncc1C(=O)NC[C@@H](F)C(O)(C2CC2)C3CC3)n4ncc5cc(cnc45)C#N
CHEMBL4112570	CC(C)Nc1cc(ncc1C(=O)NC[C@@H](F)C(C)(C)O)n2ncc3cc(Cl)c(N)nc23
CHEMBL4112662	CC(C)(CN)CNc1cc(ncc1C(=O)NC[C@@H](F)C(C)(C)O)n2ncc3cc(cnc23)C#N
CHEMBL4112724	CC(C)(O)[C@H](F)CNC(=O)c1cnc(cc1NCC(F)(F)C(C)(C)O)n2ncc3cc(cnc23)C#N
CHEMBL4112812	CC(C)(O)[C@H](F)CNC(=O)c1cnc(cc1NC2CCN(CC2)c3ccccc3)n4ncc5cc(cnc45)C#N
CHEMBL4112816	C[C@@H]1CNCCN1c2cccc(n2)n3ncc4cnc(cc34)c5cncc(C)n5
CHEMBL4112863	CC(C)(O)[C@H](F)CNC(=O)c1cnc(cc1N[C@@H]2CC[C@H](CC2)NC(=O)c3ccccc3F)n4ncc5cc(cnc45)C#N
CHEMBL4112867	CC(C)(F)[C@H](F)CNC(=O)c1cnc(cc1NC23CC4CC(CC(O)(C4)C2)C3)n5ncc6cc(cnc56)C#N
CHEMBL4112884	CC(C)(O)[C@H](F)CNC(=O)c1cnc(cc1NC2CCC2)n3ncc4cc(cnc34)C#N
CHEMBL4112913	CC[C@@H](C)Nc1cc(ncc1C(=O)NC[C@@H](F)C(C)(C)O)n2ncc3cc(C#N)c(N)nc23
CHEMBL411294	CNC(=O)c1cc(F)cc(Cl)c1NC(=O)c2cc(nn2c3ncccc3Cl)C(F)(F)F
CHEMBL4112958	CC(C)(CNc1cc(ncc1C(=O)NC[C@@H](F)C(C)(C)O)n2ncc3cc(Cl)cnc23)OC(F)F
CHEMBL4113185	Cc1cc(Nc2cc(ncc2C(=O)NC[C@@H](F)C(C)(C)O)n3ncc4cc(cnc34)C#N)[nH]n1
CHEMBL4113237	CCCn1cc(Nc2cc(ncc2C(=O)NC[C@@H](F)C(C)(C)O)n3ncc4cc(cnc34)C#N)cn1
CHEMBL4113240	CC(C)(CNc1cc(ncc1C(=O)NC[C@@H](F)C(C)(C)O)n2ncc3cc(cnc23)C#N)OC(F)F
CHEMBL4113245	CC(C)(O)[C@H](F)CNC(=O)c1cnc(cc1NCC2CC2)n3ncc4cc(cnc34)C#N
CHEMBL4113269	CC(C)(O)[C@H](F)CNC(=O)c1cnc(cc1NC2CCC(O)C2)n3ncc4cc(F)cnc34
CHEMBL4113302	Cc1cncc(n1)c2cc3c(cn2)cnn3c4cccc(n4)N5C[C@@H](N)C[C@@H](F)C5
CHEMBL4113332	O[C@@H]1CNCCN(C1)c2cccc(n2)n3ncc4cnc(cc34)c5cnn(CC(F)(F)F)c5
CHEMBL4113432	CC(C)(O)[C@H](F)CNC(=O)c1cnc(cc1Nc2ccc3ncsc3c2)n4ncc5cc(cnc45)C#N
CHEMBL4113443	CC(C)(O)[C@H](F)CNC(=O)c1cnc(cc1NC2CCC(F)C2)n3ncc4cc(F)cnc34
CHEMBL4113585	CC(C)(O)[C@H](F)CNC(=O)c1cnc(cc1N[C@@H]2CC[C@H](CC2)NC3COC3)n4ncc5cc(cnc45)C#N
CHEMBL4113624	COCCn1cc(Nc2cc(ncc2C(=O)NC[C@@H](F)C(C)(C)O)n3ncc4cc(cnc34)C#N)cn1
CHEMBL4113628	CC(F)(F)Cn1cc(Nc2cc(ncc2C(=O)NC[C@@H](F)C(C)(C)O)n3ncc4cc(cnc34)C#N)cn1
CHEMBL4113637	CC(C)(O)[C@H](F)CNC(=O)c1cnc(cc1NC2CC2)n3ncc4cc(F)cnc34
CHEMBL4113645	C[C@@H](F)CNc1cc(ncc1C(=O)NC[C@@H](F)C(C)(C)O)n2ncc3cc(C#N)c(N)nc23
CHEMBL4113747	CC(C)(O)[C@H](F)CNC(=O)c1cnc(cc1Nc2cnn(c2)S(=O)(=O)C)n3ncc4cc(cnc34)C#N
CHEMBL4113759	Cn1cc(Nc2cc(ncc2C(=O)NC[C@@H](F)C(C)(C)O)n3ncc4cc(Cl)cnc34)cn1
CHEMBL4113934	CC(C)(O)[C@H](F)CNC(=O)c1cnc(cc1NC2CC(F)(F)C2)n3ncc4cc(cnc34)C#N
CHEMBL4114010	CC[C@@H](C)Nc1cc(ncc1C(=O)NC[C@@H](F)C(C)(C)O)n2ncc3cc(cnc23)C#N
CHEMBL4114030	CC(C)(O)[C@H](F)CNC(=O)c1cnc(cc1N[C@@H]2CC[C@H](CC2)NC(=O)C3CC3)n4ncc5cc(cnc45)C#N
CHEMBL4114108	COC(C)(C)[C@H](F)CNC(=O)c1cnc(cc1NC(C)C)n2ncc3cc(C#N)c(N)nc23
CHEMBL4114115	CCNC(=O)n1cc(Nc2cc(ncc2C(=O)NC[C@@H](F)C(C)(C)O)n3ncc4cc(cnc34)C#N)cn1
CHEMBL4114244	CC(F)(F)Cn1cc(Nc2cc(ncc2C(=O)NC[C@@H](F)C(C)(C)O)n3ncc4cc(Cl)cnc34)cn1
CHEMBL4114343	CC(C)(O)[C@H](F)CNC(=O)c1cnc(cc1N[C@@H]2CC[C@@](C)(O)CC2)n3ncc4cc(cnc34)C#N
CHEMBL4114375	CC(C)(O)[C@H](F)CNC(=O)c1cnc(cc1NC2COC2)n3ncc4cc(cnc34)C#N
CHEMBL4114476	CC(C)(O)[C@H](F)CNC(=O)c1cnc(cc1Nc2cc(n[nH]2)c3ccccc3)n4ncc5cc(cnc45)C#N
CHEMBL4114640	CC[C@@H](N[C@H](C)CC(=O)N)c1ccc(Cl)c(C(=O)c2ccc(nc2)n3cccn3)c1F
CHEMBL4114850	CC(C)(O)[C@H](F)CNC(=O)c1cnc(cc1Nc2cccc(c2)C#N)n3ncc4cc(cnc34)C#N
CHEMBL4114914	CC(C)CC(=O)NCc1cnc2c(cnn2c3cc(NC(C)C)c(cn3)C(=O)NC[C@@H](F)C(C)(C)O)c1
CHEMBL4114915	CC(C)(C)CNc1cc(ncc1C(=O)NC[C@@H](F)C(C)(C)O)n2ncc3cc(cnc23)C#N
CHEMBL4115019	CC(C)(O)[C@H](F)CNC(=O)c1cnc(cc1Nc2cnn(CC(F)(F)F)c2)n3ncc4cc(Cl)cnc34
CHEMBL4115033	CC(C)(O)[C@H](F)CNC(=O)c1cnc(cc1NC2CCOCC2)n3ncc4cc(cnc34)C#N
CHEMBL4115045	CC(C)(O)[C@H](F)CNC(=O)c1cnc(cc1N[C@@H]2CC[C@](C)(O)CC2)n3ncc4cc(cnc34)C#N
CHEMBL4115046	CC(C)(O)[C@H](F)CNC(=O)c1cnc(cc1NC2COC2)n3ncc4cc(Cl)cnc34
CHEMBL4115086	CC(C)(O)[C@H](F)CNC(=O)c1cnc(cc1NCC(C)(C)N2CCOCC2)n3ncc4cc(cnc34)C#N
CHEMBL4115100	CC(C)(O)[C@H](F)CNC(=O)c1cnc(cc1N[C@@H]2CC[C@@H](O)CC2)n3ncc4cc(cnc34)C#N
CHEMBL4115189	CC(C)Nc1cc(ncc1C(=O)NC[C@@H](F)C(O)C(C)C)n2ncc3cc(cnc23)C#N
CHEMBL4115236	CC(CNc1cc(ncc1C(=O)NC[C@@H](F)C(C)(C)O)n2ncc3cncnc23)N4CCOCC4
CHEMBL4115287	CC(C)(O)[C@H](F)CNC(=O)c1cnc(cc1NCC2(F)CCC2)n3ncc4cc(cnc34)C#N
CHEMBL4115315	CCn1cc(cn1)c2cc3c(cn2)cnn3c4cccc(n4)N5CCC[C@@H](N)C5
CHEMBL4115327	COc1cnc(nc1)N2CC[C@H](C2)Nc3cc(ncc3C(=O)NC[C@@H](F)C(C)(C)O)n4ncc5cc(cnc45)C#N
CHEMBL4115485	CC(C)(F)[C@H](F)CNC(=O)c1cnc(cc1Nc2cnn(CC(F)F)c2)n3ncc4cc(cnc34)C#N
CHEMBL4115539	COc1ccc(nc1N2CCNC[C@@H](O)C2)n3ncc4cnc(cc34)c5cnn(CC(F)(F)F)c5
CHEMBL4115542	CC(C)(O)[C@H](F)CNC(=O)c1cnc(cc1NC23CC4CC(CC(O)(C4)C2)C3)n5ncc6cc(C#N)c(N)nc56
CHEMBL4115545	CC(C)(O)[C@H](F)CNC(=O)c1cnc(cc1NCc2cocn2)n3ncc4cc(cnc34)C#N
CHEMBL4115550	CC(C)C(O)CNc1cc(ncc1C(=O)NC[C@@H](F)C(C)(C)O)n2ncc3cc(Cl)cnc23
CHEMBL4115569	CCC(O)(CC)[C@H](F)CNC(=O)c1cnc(cc1NC(C)C)n2ncc3cncnc23
CHEMBL4115604	CC(C)Nc1cc(ncc1C(=O)NC[C@@H](F)C(=O)N2CCN(CC2)S(=O)(=O)C)n3ncc4cc(cnc34)C#N
CHEMBL413045	CC(C)C(C)Oc1c(C#N)c(nn1c2ccc(cn2)S(=O)(=O)C)C(F)(F)F
CHEMBL42042	Cc1ccc(CNCC2(F)CCN(CC2)C(=O)c3ccc(F)c(Cl)c3)nc1n4cccn4
CHEMBL423575	Fc1ccc(cc1)C(CCCNCc2cccc(n2)n3cccn3)c4ccc(F)cc4
CHEMBL424309	Clc1cccc(C(=O)N2CCC(CNCc3cccc(n3)n4cccn4)CC2)c1Cl
CHEMBL425057	C(N1CCN(CC1)c2ccccc2)c3cnn(c3)c4ccccn4
CHEMBL425573	CC(C)NC(=O)c1cccc(C)c1NC(=O)c2cc(nn2c3ncccc3Cl)C(F)(F)F
CHEMBL426117	CS(=O)(=O)c1ccc(nc1)n2nc(c(C#N)c2Oc3cccc4CCCCc34)C(F)(F)F
CHEMBL426475	NS(=O)(=O)c1ccc(nc1)n2nc(c(C#N)c2NCC3CCCO3)C(F)(F)F
CHEMBL426846	CS(=O)(=O)c1ccc(nc1)n2nc(cc2OC3CCCC3)C(F)(F)F
CHEMBL427234	COc1ccccc1c2ccc(nc2)n3cc(cn3)C(=O)O
CHEMBL427380	CC(C)CCCSc1c(C#N)c(nn1c2ccc(cn2)S(=O)(=O)C)C(F)(F)F
CHEMBL427880	CNC(=O)c1cc(Cl)cc(C)c1NC(=O)c2cc(OC)nn2c3ncccc3Cl
CHEMBL43030	COc1ccc2c(O[C@@H]3C[C@@H]4N(C3)C(=O)[C@H](CCCCC\C=C/[C@@H]5C[C@]5(NC4=O)C(=O)O)NC(=O)OC6CCCC6)cc(nc2c1)n7cccn7
CHEMBL430940	COc1ccc2c(O[C@@H]3C[C@@H]4N(C3)C(=O)[C@H](CCCCC\C=C/[C@@H]5C[C@]5(NC4=O)C(=O)O)NC(=O)OC6CCCC6)cc(nc2c1)n7ccc(C)n7
CHEMBL43097	Clc1ccc(cc1Cl)C(=O)N2CCC(=CC2)CNCc3cccc(n3)n4cccn4
CHEMBL436286	CC(C)NC(=O)c1cccc(Cl)c1NC(=O)c2cc(nn2c3ncccc3Cl)C(F)(F)F
CHEMBL437018	CC(C)NC(=O)c1cc(Cl)cc(C)c1NC(=O)c2cc(Cl)nn2c3ncccc3Cl
CHEMBL437691	CC(C)Oc1c(Cl)c(nn1c2ccc(cn2)S(=O)(=O)C)C(F)(F)F
CHEMBL440379	NC(=O)c1nn(c2ccccn2)c3c1CCc4n[nH]cc34
CHEMBL440412	CNC(=O)c1cc(F)cc(F)c1NC(=O)c2cc(Br)nn2c3ncccc3Cl
CHEMBL440854	FC1(CNCc2cccc(n2)n3cccn3)CCN(CC1)C(=O)c4ccc(Cl)c(Cl)c4
CHEMBL44159	Fc1ccc(cc1Cl)C(=O)N2CCC(F)(CNCc3cccc(n3)n4cccn4)CC2
CHEMBL443302	COc1ccc(cc1Cl)c2cc(nn2c3ccc(cn3)S(=O)(=O)C)C(F)(F)F
CHEMBL444007	CS(=O)(=O)c1ccc(nc1)n2nc(cc2OCc3cccc(F)c3)C(F)(F)F
CHEMBL44481	COC1(CNCc2cccc(n2)n3cccn3)CCN(CC1)C(=O)c4ccc(Cl)c(Cl)c4
CHEMBL44841	OC1(CNCc2cccc(n2)n3cccn3)CCN(CC1)C(=O)c4ccc(Cl)c(Cl)c4
CHEMBL449035	OC(=O)c1cnn(c1)c2ccc(cn2)c3occc3
CHEMBL45094	FCC1(CNCc2cccc(n2)n3cccn3)CCN(CC1)C(=O)c4ccc(Cl)c(Cl)c4
CHEMBL45205	CC1(CNCc2cccc(n2)n3cccn3)CCN(CC1)C(=O)c4ccc(Cl)c(Cl)c4
CHEMBL452595	Oc1c(nc(c2cccnc12)n3cccn3)c4oc(Cc5ccc(F)cc5)nn4
CHEMBL461097	Cc1nn(cc1CN2CCC3(CC2)OCc4ccccc34)c5ccccn5
CHEMBL464208	Cc1ccn(n1)c2nc(c(O)c3ncccc23)c4oc(Cc5ccc(F)cc5)nn4
CHEMBL466648	Cc1ncc(cc1F)c2c(C)c(CN[C@H]3CC[C@@H](F)C3)nn2c4ncccc4Cl
CHEMBL468307	Cc1ccc(cn1)c2c(C)c(CNC3CCCC3)nn2c4ncc(Cl)cc4Cl
CHEMBL468308	Cc1ccc(cn1)c2c(C)c(CN[C@H]3CC[C@@H](F)C3)nn2c4ncccc4Cl
CHEMBL468518	Cc1ccc(cn1)c2c(C)c(CNC3CCC(F)(F)C3)nn2c4ncccc4Cl
CHEMBL469913	Cc1nn(cc1CN2CCC3(CC2)OCc4ccccc34)c5cccc(Cl)n5
CHEMBL470951	Cc1cccnc1n2cc(CN3CCC4(CC3)OCc5ccccc45)c(C)n2
CHEMBL470952	CC(=O)Nc1cccnc1n2cc(CN3CCC4(CC3)OCc5ccccc45)c(C)n2
CHEMBL471116	CNC(=O)c1cccnc1n2cc(CN3CCC4(CC3)OCc5ccccc45)c(C)n2
CHEMBL471134	Cc1nn(cc1CN2CCC3(CC2)OCc4ccccc34)c5ccc(Cl)cn5
CHEMBL471304	Cc1ccnc(c1)n2cc(CN3CCC4(CC3)OCc5ccccc45)c(C)n2
CHEMBL473693	COc1ccccc1CNC(=O)c2cc(nn2c3cc(CNC(=O)[C@H](C)N)ccn3)C(F)(F)F
CHEMBL492396	Cc1c(CNC2CCCC2)nn(c1c3cccnc3)c4ncccc4Cl
CHEMBL492585	Cc1c(CNC2CCCC2)nn(c1c3ccc(Cl)nc3)c4ncccc4Cl
CHEMBL494231	Cc1c(CNC2CCCC2)nn(c1c3ccc(nc3)C(F)(F)F)c4ncccc4Cl
CHEMBL494406	Cc1cncc(c1)c2c(C)c(CNC3CCCC3)nn2c4ncccc4Cl
CHEMBL494413	Cc1ccc(cn1)c2c(C)c(CNC3CCCC3)nn2c4ncccc4C
CHEMBL494414	Cc1ccc(cn1)c2c(C)c(CNC3CCCC3)nn2c4ncccc4S(=O)(=O)C
CHEMBL494767	Cc1ccc(cn1)c2c(C)c(CNC3CCCC3)nn2c4ncccc4Cl
CHEMBL494768	CCc1ccc(cn1)c2c(C)c(CNC3CCCC3)nn2c4ncccc4Cl
CHEMBL499299	COc1ccc2c(O[C@@H]3C[C@@H]4[C@@H](C3)C(=O)N(C)CCCC\C=C/[C@@H]5C[C@]5(NC4=O)C(=O)NS(=O)(=O)C6CC6)cc(nc2c1C)n7ccc(n7)C(C)C
CHEMBL512520	Cc1nn(cc1CN2CCC3(CC2)OCc4ccccc34)c5ncccc5Cl
CHEMBL512975	Cc1ncc(cc1F)c2c(C)c(CNC3CCCC3)nn2c4ncccc4Cl
CHEMBL513571	Cc1nn(cc1CN2CCC3(CC2)OCc4ccccc34)c5ncccc5NS(=O)(=O)C
CHEMBL513855	Cc1ccc(cn1)c2c(C)c(CNC3CCCC3F)nn2c4ncccc4Cl
CHEMBL515255	COc1ccccc1CNC(=O)c2cc(nn2c3cccc(CNC(=O)[C@H](C)N)n3)C(F)(F)F
CHEMBL515259	CCNC(=O)Nc1nc2cc(cc(n3cccn3)n2n1)c4cccnc4
CHEMBL522021	Cc1ccc(cn1)c2c(C)c(CNC3CCCC3)nn2c4ncccc4C(F)(F)F
CHEMBL532232	CN(C1CCCCC1)C(=O)c2nn(c3ccccn3)c4nccc(c5cccs5)c24
CHEMBL549312	Cc1cccc(n1)n2nc(cc2c3ccc4OCOc4c3)c5ccc(cc5)C#N
CHEMBL549928	COc1ccc(cc1OC)c2cc(nn2c3ccccn3)c4ccc(cc4)C(=O)N
CHEMBL554070	N#Cc1ccc(cc1)c2cc(c3ccc4OCOc4c3)n(n2)c5ccccn5
CHEMBL557809	CCCC(CCC)C(=O)NCc1ccc2c(cnn2c3ccccn3)c1
CHEMBL559420	COc1ccc(cc1OC)c2cc(nn2c3ccccn3)c4ccc(cc4)C#N
CHEMBL560347	Cc1cccc(n1)n2nc(cc2c3ccc4OCOc4c3)c5ccc(cc5)C(=O)N
CHEMBL564502	NC(=O)c1ccc(cc1)c2cc(c3ccc(F)cc3)n(n2)c4ccccn4
CHEMBL565038	NC(=O)c1ccc(cc1)c2cc(c3ccc4OCOc4c3)n(n2)c5ccccn5
CHEMBL583017	Cc1nonc1C(=O)NC2CCCc3c2cnn3c4ccc(cn4)C(F)(F)F
CHEMBL597977	NC(=O)c1nn(c2ccccn2)c3c1CCc4cnc(NC5CCCC5)nc34
CHEMBL599345	OC(=O)C1=CN(Cc2ccc(nc2)n3cccn3)c4c(F)cccc4C1=O
CHEMBL64432	CC(C)(C)c1cc(NC(=O)Nc2cccc(Cl)c2Cl)n(n1)c3ccccn3
CHEMBL65596	CC(C)c1nn(c2ccccn2)c(c1CCC3C[C@@H](O)CC(=O)O3)c4ccc(F)cc4
CHEMBL72460	NC(=O)c1cc(c2ccc(cc2)c3ccc(Cl)cc3Cl)n(n1)c4ccccn4
CHEMBL72742	COc1ccc(cc1)S(=O)(=O)Nc2ccc(cc2)c3cc(N)n(n3)c4cc(ccn4)C(F)(F)F
Substructure	O=C1C=CN=C(N1)N1C=CC=N1
CHEMBL2098159	CC1=CC(=O)NC(=N1)n2nc(C)cc2NC(=O)COc3ccccc3C
CHEMBL2093451	CC1=CC(=O)NC(=N1)n2nc(C)cc2NC(=O)C3c4ccccc4Oc5ccccc35
CHEMBL3439283	CC1=CC(=O)NC(=N1)n2nc(cc2N)C3CC3
CHEMBL1824421	CCOC(=O)c1cnn(C2=NC(=C(C#N)C(=O)N2C)c3ccccc3F)c1N
CHEMBL2095123	CCCC1=CC(=O)NC(=N1)n2nc(C)cc2NC(=O)c3ccc(OC)c(OC)c3
CHEMBL2093499	CCCC1=CC(=O)NC(=N1)n2nc(C)cc2NC(=O)C3CN(C(=O)C3)c4ccc(C)c(C)c4
CHEMBL1824429	CCOC(=O)c1cnn(C2=NC(=C(C#N)C(=O)N2C)c3cccc(O)c3O)c1N
CHEMBL3439376	CCCC1=CC(=O)N(CC(=O)NCCOC)C(=N1)n2nc(C)cc2C
CHEMBL2098444	CCC1=CC(=O)NC(=N1)n2nc(C)cc2NC(=O)c3oc4ccccc4c3
CHEMBL582197	CCC1=C(C)N=C(NC1=O)n2nc(C)cc2NC(=O)C3c4ccccc4Oc5ccccc35
CHEMBL588727	CCC(C(=O)Nc1cc(C)nn1C2=NC(=C(CC)C(=O)N2)C)c3ccccc3
CHEMBL1824426	CCOC(=O)c1cnn(C2=NC(=C(C#N)C(=O)N2C)c3ccccc3Cl)c1N
CHEMBL1729906	CC1=CC(=O)NC(=N1)n2nc(C)cc2NC(=O)c3cccc(F)c3
CHEMBL3439375	CCCC1=CC(=O)N(CC(=O)NC(C)C)C(=N1)n2nc(C)cc2C
CHEMBL1356551	CC1=C(C)C(=O)N(CC(=O)Nc2ccc(cc2)[N+](=O)[O-])C(=N1)n3nc(C)cc3C
CHEMBL3439531	CC1=CC(=O)NC(=N1)n2nc(C)c(CCC(=O)Nc3nc(C)cs3)c2C
CHEMBL3439527	CCC1=C(C)N=C(NC1=O)n2nc(cc2NC(=O)C)C3CC3
CHEMBL4066260	CC1=C(C)C(=O)NC(=N1)n2nc(cc2NC(=O)COc3ccccc3F)c4cccs4
CHEMBL2094534	CC1=CC(=O)NC(=N1)n2nc(C)cc2NC(=O)C3CCCC3
CHEMBL1824424	CCOC(=O)c1cnn(C2=NC(=C(C#N)C(=O)N2C)c3ccc(cc3)N(C)C)c1N
CHEMBL3439524	CCC1=CC(=O)NC(=N1)n2nc(cc2NC(=O)C3CC3)C4CC4
CHEMBL2093812	CC1=CC(=O)NC(=N1)n2nc(cc2NC(=O)C3(CCCC3)c4ccc(Cl)cc4)c5cccs5
CHEMBL2098124	CCC1=C(C)N=C(NC1=O)n2nc(C)cc2NC(=O)COc3ccccc3F
CHEMBL3439284	CCCC1=CC(=O)NC(=N1)n2nc(cc2N)C3CC3
CHEMBL3444108	COC(=O)CCc1c(C)nn(C2=NC(=CC(=O)N2)C)c1C
CHEMBL1699889	CC1=CC(=O)NC(=N1)n2nc(C)cc2NC(=O)COc3cccc(C)c3
CHEMBL2093503	Cc1cc(NC(=O)c2cccs2)n(n1)C3=NC4=C(CCC4)C(=O)N3
CHEMBL1824428	CCOC(=O)c1cnn(C2=NC(=C(C#N)C(=O)N2C)c3ccccc3O)c1N
CHEMBL2093448	CC1=CC(=O)NC(=N1)n2nc(C)cc2NC(=O)c3c(F)cccc3Cl
CHEMBL2098327	CCOc1ccc(CC(=O)Nc2cc(C)nn2C3=NC(=C(CC)C(=O)N3)C)cc1
CHEMBL2093447	CCOC(=O)c1c2CCCCCc2sc1NC(=O)CN3C(=O)C=C(CC)N=C3n4nc(C)cc4C
CHEMBL524606	CCCC1=CC(=O)NC(=N1)n2nc(C)cc2NC(=O)C(CC)c3ccccc3
CHEMBL2093830	CCCC1=CC(=O)N(CC(=O)Nc2ccc(C)cc2)C(=N1)n3nc(C)cc3C
CHEMBL3759177	CCC1=CC(=O)NC(=N1)n2nc(cc2NC(=O)Nc3ccc4OCOc4c3)c5ccccc5
CHEMBL3439374	CCCNC(=O)CN1C(=O)C=C(CCC)N=C1n2nc(C)cc2C
CHEMBL1965458	CC1=C(CCO)C(=O)NC(=N1)n2nc(C)cc2C
CHEMBL3431297	Cc1cc(NC(=O)C2CCCCC2)n(n1)C3=NC4=C(CCC4)C(=O)N3
CHEMBL1485014	Oc1c2CCCCc2nn1C3=NC(=CC(=O)N3)C(F)(F)F
CHEMBL1731310	CC1=CC(=O)NC(=N1)n2nc(C)cc2NC(=O)CCc3ccccc3
CHEMBL1824422	CCOC(=O)c1cnn(C2=NC(=C(C#N)C(=O)N2C)c3occc3)c1N
CHEMBL2093500	CC1=C(C)C(=O)NC(=N1)n2nc(C)cc2NC(=O)COc3ccc(Cl)cc3
CHEMBL2098184	CCC1=C(C)N=C(NC1=O)n2nc(C)cc2NC(=O)c3ccccc3SC
CHEMBL3439532	CC(C)CNC(=O)CCc1c(C)nn(C2=NC(=CC(=O)N2)C)c1C
CHEMBL1523145	CC(=O)c1ccc(NC(=O)CN2C(=O)C=C(C)N=C2n3nc(C)cc3C)cc1
CHEMBL532439	CCC1=CC(=O)NC(=N1)n2nc(C)cc2NC(=O)CC(c3ccccc3)c4ccccc4
CHEMBL3759613	CCC1=CC(=O)NC(=N1)n2nc(cc2NC(=O)Nc3ccc(cc3)C(C)(C)C)c4ccccc4
CHEMBL534210	CCOc1ccc2ccccc2c1C(=O)Nc3cc(C)nn3C4=NC(=CC(=O)N4)C
CHEMBL580305	CCC1=C(C)N=C(NC1=O)n2nc(C)cc2NC(=O)CCc3ccccc3
CHEMBL549250	CCCC1=CC(=O)NC(=N1)n2nc(C)cc2NC(=O)CC(c3ccccc3)c4ccccc4
CHEMBL2093450	CC1=CC(=O)NC(=N1)n2nc(C)cc2NC(=O)c3ccc(cc3)S(=O)(=O)N4CCCCC4
CHEMBL1452798	CC1=C(C)C(=O)N(CC(=O)Nc2ccc(Cl)c(Cl)c2)C(=N1)n3nc(C)cc3C
CHEMBL2093141	CC1=CC(=O)NC(=N1)n2nc(C)cc2NC(=O)\C=C\c3ccc4OCOc4c3
CHEMBL1824425	CCOC(=O)c1cnn(C2=NC(=C(C#N)C(=O)N2C)c3ccc(Cl)cc3)c1N
CHEMBL3759192	CCC1=CC(=O)NC(=N1)n2nc(cc2NC(=O)Nc3cc(OC)cc(OC)c3)c4ccccc4
CHEMBL2093502	Cc1cc(NC(=O)C2(CCCC2)c3ccc(Cl)cc3)n(n1)C4=NC5=C(CCC5)C(=O)N4
CHEMBL3439277	CC1=CC(=O)NC(=N1)n2nc(cc2N)c3cccs3
CHEMBL1824427	CCOC(=O)c1cnn(C2=NC(=C(C#N)C(=O)N2C)c3cccc(OC)c3OC)c1N
CHEMBL588248	CCC1=C(C)N=C(NC1=O)n2nc(C)cc2NC(=O)c3cccc4ccccc34
CHEMBL1512340	CC(=O)c1ccc(NC(=O)CN2C(=O)C(=C(C)N=C2n3nc(C)cc3C)C)cc1
CHEMBL2093498	CCCC1=CC(=O)NC(=N1)n2nc(C)cc2NC(=O)c3oc(Br)cc3
CHEMBL1722496	CC1=CC(=O)NC(=N1)n2nc(C)cc2NC(=O)c3cccs3
CHEMBL3758210	CCC1=C(C)N=C(NC1=O)n2nc(C)cc2NC(=O)Nc3cccc(OC)c3
CHEMBL2093446	CCOC(=O)c1c2CCCc2sc1NC(=O)CN3C(=O)C=C(CC)N=C3n4nc(C)cc4C
CHEMBL2093156	CC1=CC(=O)NC(=N1)n2nc(C)c(CCC(=O)Nc3cc(C)on3)c2C
CHEMBL3439525	CC(=O)Nc1cc(nn1C2=NC(=C(C)C(=O)N2)C)C3CC3
CHEMBL2093157	CC1=CC(=O)NC(=N1)n2nc(C)c(CCC(=O)Nc3ccc(F)c(c3)C(F)(F)F)c2C
CHEMBL586274	CCC1=C(C)N=C(NC1=O)n2nc(C)cc2NC(=O)CC(c3ccccc3)c4ccccc4
CHEMBL546912	CC1=CC(=O)NC(=N1)n2nc(C)cc2NC(=O)CC(c3ccccc3)c4ccccc4
CHEMBL3439276	CC1=C(C)C(=O)NC(=N1)n2nc(cc2N)c3cccs3
CHEMBL2093496	CCCC1=CC(=O)NC(=N1)n2nc(C)cc2NC(=O)C34CC5CC(CC(C5)C3)C4
CHEMBL2093497	CCCC1=CC(=O)NC(=N1)n2nc(C)cc2NC(=O)COc3ccc(Cl)cc3Cl
CHEMBL529312	CC1=CC(=O)NC(=N1)n2nc(C)cc2NC(=O)C(c3ccccc3)c4ccccc4
CHEMBL3439285	CC(C)C1=CC(=O)NC(=N1)n2nc(cc2N)C3CC3
CHEMBL1513895	CC1=CC(=O)N(CC(=O)Nc2cccc(c2)[N+](=O)[O-])C(=N1)n3nc(C)cc3C
CHEMBL3439530	CC1=CC(=O)NC(=N1)n2nc(C)c(CCC(=O)NCc3cccs3)c2C
CHEMBL2097864	CC1=C(C)C(=O)NC(=N1)n2nc(C)cc2NC(=O)c3cccs3
CHEMBL2093501	COc1ccc(Cl)cc1C(=O)Nc2cc(C)nn2C3=NC4=C(CCC4)C(=O)N3
CHEMBL534821	CC1=C(C)C(=O)NC(=N1)n2nc(C)cc2NC(=O)c3cc(Br)ccc3Cl
CHEMBL3439297	CC(C)C(=O)Nc1cc(C)nn1C2=NC(=C(C)C(=O)N2)C
CHEMBL3431296	CC(C)CC(=O)Nc1cc(nn1C2=NC3=C(CCCC3)C(=O)N2)C4CC4
CHEMBL3444155	COCCNC(=O)CCc1c(C)nn(C2=NC(=C(C)C(=O)N2)C)c1C
CHEMBL586186	CCC1=C(C)N=C(NC1=O)n2nc(C)cc2NC(=O)c3ccc(OC)cc3OC
CHEMBL1395198	CC1=CC(=O)N(CC(=O)Nc2ccc(Cl)c(Cl)c2)C(=N1)n3nc(C)cc3C
CHEMBL3431298	Cc1cc(NC(=O)CC2CCCCC2)n(n1)C3=NC4=C(CCC4)C(=O)N3
CHEMBL3758383	COc1cc(NC(=O)Nc2cc(nn2C3=NC(=CC(=O)N3)C)c4ccccc4)cc(OC)c1
CHEMBL3431295	CC(C)(C)C(=O)Nc1cc(nn1C2=NC3=C(CCCC3)C(=O)N2)C4CC4
CHEMBL1452116	CC1=C(Cc2ccccc2)C(=O)NC(=N1)n3nc4CCCCc4c3O
CHEMBL1435479	CC1=C(C)C(=O)N(CC(=O)Nc2cccc(c2)[N+](=O)[O-])C(=N1)n3nc(C)cc3C
CHEMBL2098167	CCC1=CC(=O)NC(=N1)n2nc(C)cc2NC(=O)c3ccc(cc3)C(C)(C)C
CHEMBL2094929	CCC1=C(C)N=C(NC1=O)n2nc(C)cc2NC(=O)c3ccccc3Cl
CHEMBL1548196	CC1=CC(=O)NC(=N1)n2nc3CCCCc3c2O
CHEMBL3439282	CCC1=C(C)N=C(NC1=O)n2nc(cc2N)c3cccs3
CHEMBL1546307	CCCC1=CC(=O)NC(=N1)n2nc3CCCCc3c2O
CHEMBL3439529	CC1=CC(=O)NC(=N1)n2nc(C)c(CCC(=O)NCc3occc3)c2C
CHEMBL1824423	CCOC(=O)c1cnn(C2=NC(=C(C#N)C(=O)N2C)c3cccs3)c1N
CHEMBL3431105	CCN(CC)S(=O)(=O)c1ccc(cc1)C(=O)Nc2cc(C)nn2C3=NC(=C(C)C(=O)N3)C
CHEMBL1704360	CC1=CC(=O)NC(=N1)n2nc(C)cc2NC(=O)Cc3cccc(C)c3
CHEMBL587830	CC1=CC(=O)NC(=N1)n2nc(C)cc2NC(=O)C3(CCCC3)c4ccc(Cl)cc4
CHEMBL3758249	CC1=CC(=O)NC(=N1)n2nc(cc2NC(=O)Nc3ccc4OCOc4c3)c5ccccc5
CHEMBL3758815	CCC1=CC(=O)NC(=N1)n2nc(cc2NC(=O)Nc3ccc(OC)cc3)c4ccccc4
CHEMBL3439526	CC(C)C(=O)Nc1cc(nn1C2=NC(=C(C)C(=O)N2)C)C3CC3
CHEMBL3439281	CCCC1=CC(=O)NC(=N1)n2nc(cc2N)c3cccs3
CHEMBL3444132	CCCC1=CC(=O)N(CC(=O)N)C(=N1)n2nc(C)cc2C
CHEMBL2093452	CCC1=CC(=O)NC(=N1)n2nc(C)cc2NC(=O)Cc3cccs3
CHEMBL1728324	CC1=C(C)C(=O)N(CC(=O)Nc2ccc(OC(F)(F)F)cc2)C(=N1)n3nc(C)cc3C
CHEMBL1824420	CCOC(=O)c1cnn(C2=NC(=C(C#N)C(=O)N2C)c3ccc(OC)cc3)c1N
CHEMBL2093449	CC1=CC(=O)NC(=N1)n2nc(C)cc2NC(=O)c3ccccc3C(F)(F)F
CHEMBL3436760	CC1=CC(=O)NC(=N1)n2nc(cc2N)c3ccccc3
CHEMBL2093445	CCOC(=O)c1c2CCCc2sc1NC(=O)C(C)N3C(=O)C=C(CC)N=C3n4nc(C)cc4C
CHEMBL537715	CCCC1=CC(=O)NC(=N1)n2nc(C)cc2NC(=O)c3oc4ccccc4c3
CHEMBL1450326	CC1=CC(=O)N(CC(=O)Nc2ccc(cc2)[N+](=O)[O-])C(=N1)n3nc(C)cc3C
